# Supplementary material
Source: PubMed Central journal article supplement (PMC3475161)
Supplement: NIHMS402714-supplement-1_si_001.pdf [file NIHMS402714-supplement-1_si_001.pdf]

## Supporting Information

### Asymmetric Synthesis of Trifluoromethylated amines *via* Catalytic Enantioselective Isomerization of imines

Yongwei Wu, Li Deng\*

*Department of Chemistry  
Brandeis University  
Waltham, Massachusetts 02454-9110*

#### Table of contents:

|                                                                                                            |    |
|------------------------------------------------------------------------------------------------------------|----|
| 1. General Information.....                                                                                | 2  |
| 2. Materials and methods.....                                                                              | 2  |
| 3. Isomerization of trifluoromethyl imines.....                                                            | 11 |
| 4. Hydrolysis of chiral amines <b>2D</b> .....                                                             | 17 |
| 5. References.....                                                                                         | 18 |
| 6. <sup>1</sup> H and <sup>13</sup> C NMR Spectra for New Compounds, HPLC Spectra for chiral products..... | 19 |

## 1. General Information.

$^1\text{H}$  and  $^{13}\text{C}$  NMR spectra were recorded on a Varian instrument (400 MHz and 100 MHz, respectively) and internally referenced to tetramethylsilane signal or residual protio solvent signals. Data for  $^1\text{H}$  NMR are recorded as follows: chemical shift ( $\delta$ , ppm), multiplicity (s, singlet; d, doublet; t, triplet; q, quartet; m, multiplet), integration, coupling constant (Hz). Data for  $^{13}\text{C}$  NMR are reported in terms of chemical shift ( $\delta$ , ppm). Infrared spectra were recorded on a Perkin Elmer FT-IR Spectrometer and are reported in frequency of absorption. Low resolution and high resolution mass spectra were recorded on either a Micromass 70-VSE-B instrument (EI, CI) or a Micromass Q-TOF instrument (ESI). Specific rotations were measured on a Jasco Digital Polarimeter.

High performance liquid chromatography (HPLC) analyses were performed on a Hewlett-Packard 1100 Series instrument equipped with a quaternary pump, using Daicel Chiralpak AD, Daicel Chiralcel OJ-H or AS-H Columns (250 x 4.6 mm). UV absorption was monitored at 254 nm.

## 2. Materials:

**A. Catalysts (S-Figure 1):** Catalysts triethylamine (TEA), DHQ-4 and DHQ-7a were purchased from Sigma-Aldrich Inc. and used as received. DHQ-3<sup>1</sup>, Q-6<sup>2</sup> and DHQ-7b<sup>3</sup> were synthesized according to our previous reports. Q-5<sup>4</sup>, DHQ-7c<sup>5</sup> and DHQ-7d<sup>6</sup> were prepared from known procedures.

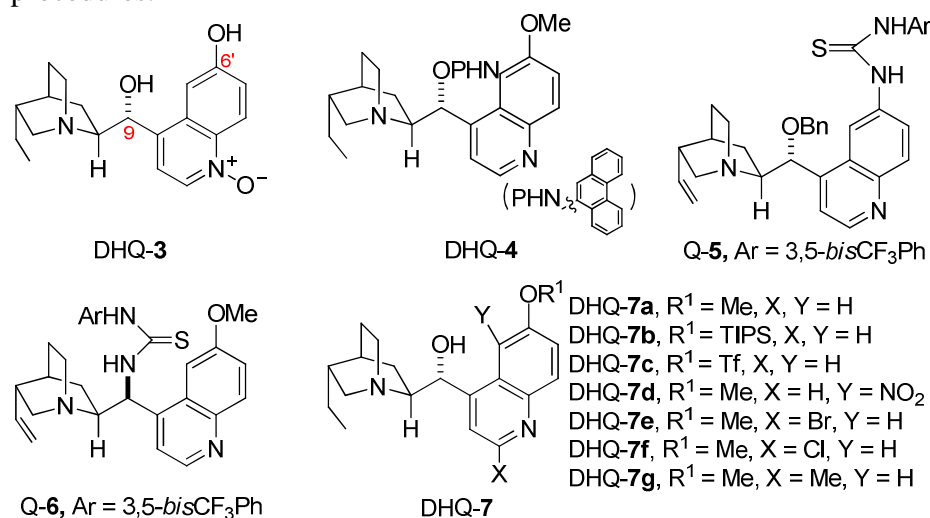

S-Figure 1. Structures of cinchona alkaloids catalysts

## Preparation of catalyst DHQ-7e

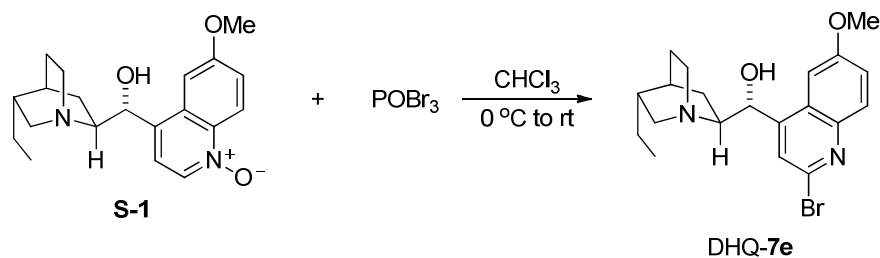

At 0 °C, to the solution of **S-1**<sup>1</sup> (342 mg, 1.0 mmol) in CHCl<sub>3</sub> (3.0 mL) was added dropwise the solution of POBr<sub>3</sub> (4.0 mmol, 1.15 g) in CHCl<sub>3</sub> (1.0 mL) under N<sub>2</sub>. The orange solution was allowed to warm up to room temperature and stirred overnight. CHCl<sub>3</sub> (10 mL) was added and the mixture was poured into ice-water (12.0 mL). Then it was adjusted to pH=10 with NH<sub>4</sub>OH (sat.). The organic layer was separated and the aqueous layer was extracted with CH<sub>2</sub>Cl<sub>2</sub> (20 mL×3). The organic layers were combined, dried over Na<sub>2</sub>SO<sub>4</sub> and concentrated. The yellow residue was applied to silica (CH<sub>2</sub>Cl<sub>2</sub>/MeOH/Et<sub>3</sub>N = 50/1/1 to 10/1/0.2 ) to afford DHQ-7e as a white solid (210 mg, 52% yield). The catalyst was dried in a vacuum drier at 90 °C for 6h prior to use. m. p. 187-189 °C; [α]<sub>D</sub><sup>23</sup> = -51.0 (c = 0.30, CHCl<sub>3</sub>); <sup>1</sup>H NMR (400 MHz, CDCl<sub>3</sub>) δ 7.93 (d, *J* = 9.2 Hz, 1H), 7.66 (s, 1H), 7.33 (dd, *J* = 9.2, 2.5 Hz, 1H), 7.17 (s, 1H), 5.50 (s, 1H), 3.89 (s, 3H), 3.51 – 3.28 (m, 1H), 3.14 – 2.86 (m, 2H), 2.66 (t, *J* = 10.0 Hz, 1H), 2.39 (d, *J* = 13.4 Hz, 1H), 1.95 – 1.60 (m, 4H), 1.56 – 1.35 (m, 3H), 1.35 – 1.14 (m, 2H), 0.82 (t, *J* = 7.3 Hz, 3H); <sup>13</sup>C NMR (100 MHz, CDCl<sub>3</sub>) δ 158.2, 150.9, 144.7, 139.5, 130.9, 125.7, 123.2, 122.3, 102.0, 71.9, 59.9, 58.8, 56.0, 43.6, 37.6, 28.3, 27.9, 25.5, 21.3, 12.3; IR (CHCl<sub>3</sub>) ν 2929, 2866, 1620, 1578, 1556, 1504, 1454, 1288, 1233, 1093, 897, 748 cm<sup>-1</sup>; HRMS (ESI/[M+H]<sup>+</sup>) Calcd. for C<sub>20</sub>H<sub>26</sub>BrN<sub>2</sub>O<sub>2</sub> requires m/z 405.1178, found m/z 405.1172.

### Preparation of catalyst DHQ-7f

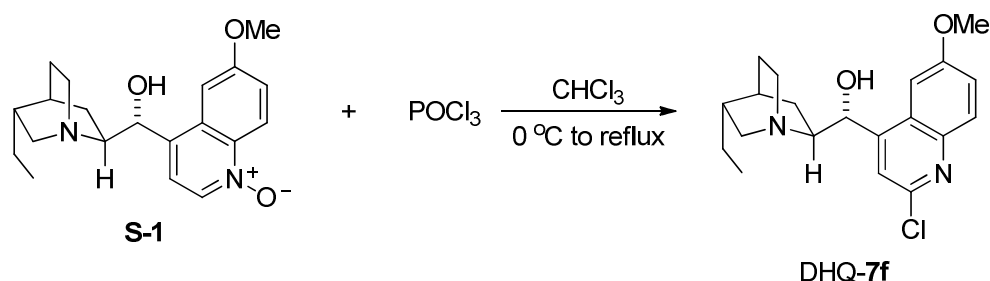

At 0 °C, to the solution of **S-1**<sup>1</sup> (1.37 g, 4.0 mmol) in CHCl<sub>3</sub> (18.0 mL) was added dropwise the solution of POCl<sub>3</sub> (16.0 mmol, 1.5 mL) under N<sub>2</sub>. The orange solution was stirred at 0 °C for 30 min before it was moved to a 70 °C oil bath. After being refluxed for 2h, the reaction mixture was poured into ice-water (30 mL). Then it was adjusted to pH=10 with NH<sub>4</sub>OH (sat.). The mixture was extracted with CH<sub>2</sub>Cl<sub>2</sub> (50 mL×4). The organic layers were combined, washed with brine (40 mL), dried over Na<sub>2</sub>SO<sub>4</sub> and concentrated. The yellow residue was applied to silica (CH<sub>2</sub>Cl<sub>2</sub>/MeOH = 20/1 + 1% NH<sub>4</sub>OH ) to afford DHQ-7f as a white solid (1.27 g, 88% yield). The catalyst was dried in a vacuum drier at 90 °C for 6 h prior to use. m. p. 196-198 °C; [α]<sub>D</sub><sup>23</sup> = -78.6 (c = 0.22, CHCl<sub>3</sub>); <sup>1</sup>H NMR (400 MHz, CDCl<sub>3</sub>) δ 7.89 (d, *J* = 9.2 Hz, 1H), 7.54 (s, 1H), 7.33 (dd, *J* = 9.2, 2.5 Hz, 1H), 7.16 (d, *J* = 2.4 Hz, 1H), 5.55 (s, 1H), 3.88 (s, 3H), 3.46 (bs, 1H), 3.08 (dd, *J* = 13.3, 9.8 Hz, 2H), 2.67 (t, *J* = 9.9 Hz, 1H), 2.39 (d, *J* = 13.5 Hz, 1H), 2.00 (bs, 1H), 1.84 – 1.62

(m, 3H), 1.59 – 1.32 (m, 3H), 1.32 – 1.09 (m, 2H), 0.81 (t,  $J = 7.3$  Hz, 3H);  $^{13}\text{C}$  NMR (100 MHz,  $\text{CDCl}_3$ )  $\delta$  157.9, 151.8, 148.4, 143.8, 130.5, 125.4, 122.0, 119.7, 102.0, 71.8, 59.8, 58.7, 55.8, 43.4, 37.5, 28.2, 27.8, 25.4, 21.2, 12.2; IR ( $\text{CHCl}_3$ )  $\nu$  2930, 2888, 1620, 1590, 1503, 1296, 1235, 1099, 1031, 911, 831, 753  $\text{cm}^{-1}$ ; HRMS (ESI/[M+H] $^+$ ) Calcd. for  $\text{C}_{20}\text{H}_{26}\text{N}_2\text{O}_2\text{Cl}$  requires  $m/z$  361.1683, found  $m/z$  361.1685.

### Preparation of catalyst DHQ-7g

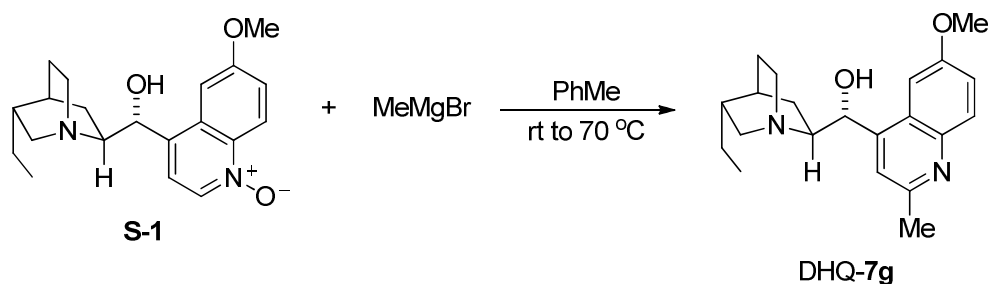

A modified procedure from a reported 2'-Methylquinidine synthesis<sup>7</sup> was used here. At ambient temperature, to a dry 25 mL flask charged with  $\text{MeMgBr}$  (3.12 M in ether, 4.0 mL) was added dropwise the solution of **S-1** (342 mg, 1.0 mmol) in  $\text{PhMe}$  (7.0 mL) over 15 min. The resulting dark red solution was moved to a  $70\text{ }^\circ\text{C}$  oil bath. After 2.5 h, the reaction was quenched by the addition of ice-water (10.0 mL).  $\text{HCl}$  (conc., 12.1 M) was added to make the solution acidic as indicated by pH paper. The aqueous layer was washed with  $\text{Et}_2\text{O}$  (10 mL $\times$ 2), basified with  $\text{NaOH}$  (sat.), and extracted with  $\text{CHCl}_3$  (20 mL $\times$ 4). The organic extracts were combined, washed with brine, dried over  $\text{Na}_2\text{SO}_4$  and concentrated. The residue was applied to silica gel column ( $\text{CH}_2\text{Cl}_2/\text{MeOH} = 20/1 + 1\% \text{NH}_4\text{OH}$ ) to afford **DHQ-7g** as a light yellow solid (182 mg, 54% yield). The catalyst was vacuumed for 6h prior to use. m. p.  $113\text{--}115\text{ }^\circ\text{C}$ ;  $[\alpha]_{\text{D}}^{23} = -77.0$  ( $c = 0.27$ ,  $\text{CHCl}_3$ );  $^1\text{H}$  NMR (400 MHz,  $\text{CDCl}_3$ )  $\delta$  7.90 (d,  $J = 9.2$  Hz, 1H), 7.39 (s, 1H), 7.29 (dd,  $J = 9.2$ , 2.8 Hz, 1H), 7.15 (d,  $J = 2.6$  Hz, 1H), 5.51 (d,  $J = 3.8$  Hz, 1H), 3.88 (s, 3H), 3.46 (bs, 1H), 3.15 – 3.00 (m, 2H), 2.72 – 2.59 (m, 4H), 2.44 – 2.33 (m, 1H), 1.83 – 1.64 (m, 3H), 1.54 – 1.35 (m, 3H), 1.31 – 1.15 (m, 3H), 0.81 (t,  $J = 7.3$  Hz, 3H);  $^{13}\text{C}$  NMR (100 MHz,  $\text{CDCl}_3$ )  $\delta$  157.2, 156.1, 147.8, 144.0, 130.8, 124.8, 121.3, 119.4, 101.4, 72.0, 59.9, 58.7, 55.8, 43.5, 37.6, 28.3, 27.8, 25.6, 25.2, 21.5, 12.2; IR ( $\text{CHCl}_3$ )  $\nu$  2930, 2867, 1621, 1602, 1505, 1455, 1379, 1343, 1232, 1121, 1034, 831, 752  $\text{cm}^{-1}$ ; HRMS (ESI/[M+H] $^+$ ) Calcd. for  $\text{C}_{21}\text{H}_{29}\text{N}_2\text{O}_2$  requires  $m/z$  341.2229, found  $m/z$  341.2236.

### B. Trifluoromethyl ketones (S-Figure 2)

Trifluoromethyl ketones **S-2a** to **S-2k** and **S-2n** were purchased from VWR international Inc. and used directly. **S-2l** and **S-2m** were synthesized via a literature reported procedure<sup>8</sup>.

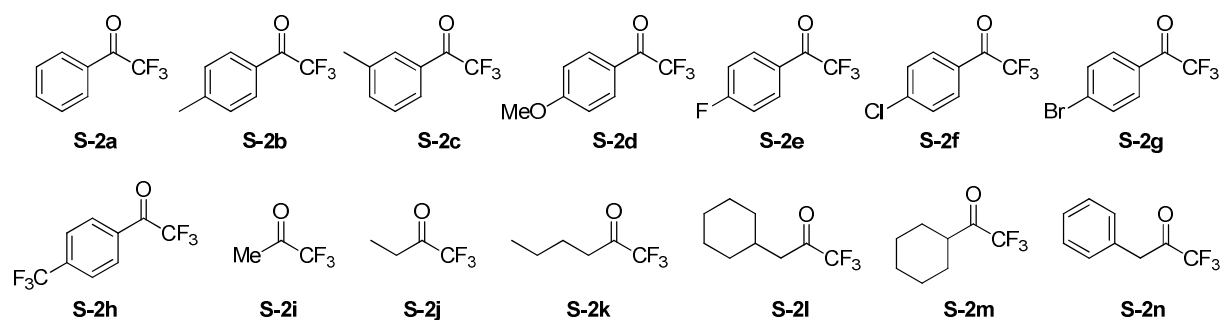

S-Figure 2. Structures of trifluoromethyl ketones

### C. Benzylamines (S-Figure 3)

Benzylamines **S-3a**, **S-3b** and hydrochloride salts of benzylamines **S-3c** to **S-3e** were purchased from VWR International Inc., benzylamines **S-3c** to **S-3e** were obtained *via* neutralization of the corresponding benzylamine hydrochloride salts with  $\text{NH}_4\text{OH}$  (sat.) followed by extraction with  $\text{CH}_2\text{Cl}_2$ .

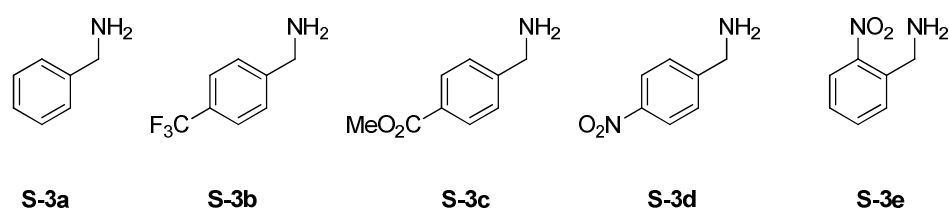

S-Figure 3. Structures of benzylamines

### D. *N*-benzyl trifluoromethyl imines

General procedure for the preparation of *N*-benzyl imines **1**

#### Method A

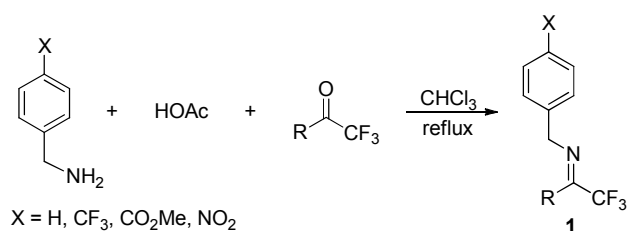

**Method B**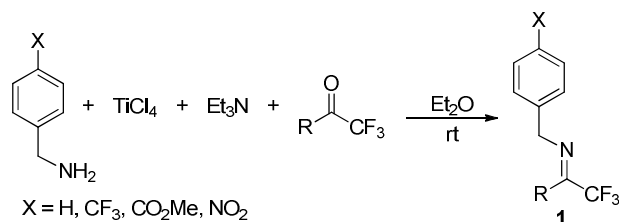

**Method A:** To the mixture of benzyl amine (1.0 eq.) and acetic acid (1.0 eq.) in CHCl<sub>3</sub> (1.0 mL/mmol) was added the solution of trifluoromethyl ketone (1.0 eq.) in CHCl<sub>3</sub> (0.2 mL/mmol) in one portion. The resulting mixture was refluxed until all the ketone was consumed (indicated by TLC or by the disappearance of the insoluble solid). After cooling down to room temperature, CH<sub>2</sub>Cl<sub>2</sub> (4.0 mL/mmol) was added and the mixture was washed with NaHCO<sub>3</sub> (sat., 2.0 mL/mmol). The aqueous layer was extracted with CH<sub>2</sub>Cl<sub>2</sub> (4.0 mL/mmol×2). The organic phase was combined, washed with brine, dried over Na<sub>2</sub>SO<sub>4</sub> and concentrated. The yellow residue was applied to silica gel column chromatography (Hexanes/CH<sub>2</sub>Cl<sub>2</sub> = 20/1 to Hexanes/CH<sub>2</sub>Cl<sub>2</sub> = 1/1) to afford the benzyl imine.

**Method B:** At -40 °C to the solution of trifluoroketone (1.0 eq.) in ethyl ether (0.6 mL/mmol) was added the solution of 4-NO<sub>2</sub> benzylamine (1.0 eq.) and triethylamine (2.0 eq.) in ethyl ether (0.4 mL/mmol). After 5 mins, the reaction mixture was raised to 0 °C and TiCl<sub>4</sub> (0.5 eq.) in hexanes (4.0 mL/mmol TiCl<sub>4</sub>) was added dropwise. After the addition, the orange suspension was allowed to warm up to room temperature. The reaction was monitored by <sup>1</sup>H NMR. After the consumption of benzyl amine, ethyl ether (2.0 mL/mmol ketone) was then added. The solid was filtered and washed with ether (2.0 mL/mmol ketone). The filtrate was combined and concentrated to afford a yellow liquid which was applied to silica (Hexanes/CH<sub>2</sub>Cl<sub>2</sub> = 20/1 to Hexanes/CH<sub>2</sub>Cl<sub>2</sub> = 1/1) to afford the desired benzyl imine.

Benzylamines **1Aa** and **1Ba** were synthesized according to a literature procedure<sup>9</sup>.

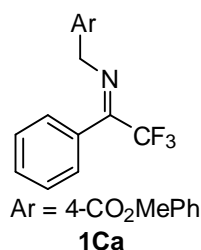

**4-Carboxylate benzyl imine 1Ca.** This compound was synthesized *via* method A and was isolated by flash chromatography (Hexanes/EA = 50/1 to Hexanes/EA = 5/1) as a yellow liquid in 73% yield. The compound could be stored for months under -50 °C. <sup>1</sup>H NMR (400 MHz, CDCl<sub>3</sub>) δ = 8.01 (d, *J* = 8.2 Hz, 2H), 7.54 – 7.45 (m, 3H), 7.34 (d, *J* = 8.1 Hz, 2H), 7.31 – 7.26 (m, 2H), 4.64 (s, 2H), 3.89 (s, 3H); <sup>13</sup>C NMR (100 MHz, CDCl<sub>3</sub>) δ = 166.9, 159.6 (q, *J*<sub>C-F</sub> = 33.9 Hz), 143.3, 130.4, 130.0, 129.9, 129.1, 129.0, 127.5, 127.4, 119.7 (q, *J*<sub>C-F</sub> = 278.8 Hz), 56.4, 52.1; <sup>19</sup>F NMR (376 MHz, CDCl<sub>3</sub>) δ = -71.3; IR(CHCl<sub>3</sub>) ν 2953, 1719, 1669, 1613, 1577, 1436, 1332, 1277, 1190, 1128, 1019, 963, 838, 754 cm<sup>-1</sup>; HRMS (ESI/[M+H]<sup>+</sup>) Calcd. for C<sub>17</sub>H<sub>15</sub>NO<sub>2</sub>F<sub>3</sub> *m/z* 322.1055, found *m/z* 322.1061.

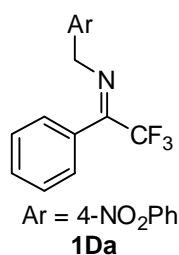

**4-NO<sub>2</sub> benzyl imine 1Da.** This compound was synthesized *via* method A as a white solid in 41% yield after flash chromatography (Hexanes/CH<sub>2</sub>Cl<sub>2</sub> = 20/1 to Hexanes/CH<sub>2</sub>Cl<sub>2</sub> = 1/1). The compound could be stored for months under -50 °C. <sup>1</sup>H NMR (400 MHz, CDCl<sub>3</sub>) δ = 8.21 (d, *J* = 8.5 Hz, 2H), 7.59 – 7.49 (m, 3H), 7.47 (d, *J* = 8.4 Hz, 2H), 7.32 – 7.27 (m, 2H), 4.69 (s, 2H); <sup>13</sup>C NMR (100 MHz, CDCl<sub>3</sub>) δ = 160.4 (d, *J*<sub>C-F</sub> = 34.2 Hz), 147.3, 145.6, 130.8, 129.9, 129.3, 128.3, 127.5, 123.9, 119.7 (d, *J*<sub>C-F</sub> = 278.7 Hz), 56.0; <sup>19</sup>F NMR (376 MHz, CDCl<sub>3</sub>) δ = -71.4; IR(CHCl<sub>3</sub>) ν 1670, 1604, 1518, 1340, 1190, 1126, 1017, 943, 841, 701 cm<sup>-1</sup>; HRMS (ESI/[M+H]<sup>+</sup>) Calcd. for C<sub>15</sub>H<sub>12</sub>N<sub>2</sub>O<sub>2</sub>F<sub>3</sub> m/z 309.0851, found m/z 309.0847.

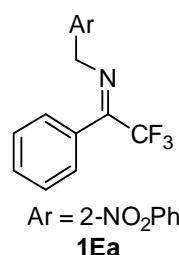

**2-NO<sub>2</sub> benzyl imine 1Ea.** This compound was synthesized *via* method A as a yellow solid in 40% yield after flash chromatography (Hexanes/CH<sub>2</sub>Cl<sub>2</sub> = 20/1 to Hexanes/CH<sub>2</sub>Cl<sub>2</sub> = 1/1). The compound could be stored for months under -50 °C. <sup>1</sup>H NMR (400 MHz, CDCl<sub>3</sub>) δ = 8.06 (d, *J* = 8.2 Hz, 1H), 7.74 – 7.61 (m, 2H), 7.54 – 7.41 (m, 4H), 7.38 – 7.28 (m, 2H), 4.92 (s, 2H); <sup>13</sup>C NMR (100 MHz, CDCl<sub>3</sub>) δ = 160.4 (q, *J*<sub>C-F</sub> = 34.2 Hz), 148.1, 134.21, 134.0, 130.8, 130.3, 130.1, 129.3, 128.4, 127.6, 125.2, 119.8 (q, *J*<sub>C-F</sub> = 278.8 Hz), 54.1; <sup>19</sup>F NMR (376 MHz, CDCl<sub>3</sub>) δ = -71.2; IR(CHCl<sub>3</sub>) ν 1670, 1613, 1526, 1445, 1340, 1196, 1131, 1014, 961, 858, 731 cm<sup>-1</sup>; HRMS (ESI/[M+H]<sup>+</sup>) Calcd. for C<sub>15</sub>H<sub>12</sub>N<sub>2</sub>O<sub>2</sub>F<sub>3</sub> m/z 309.0851, found m/z 309.0842.

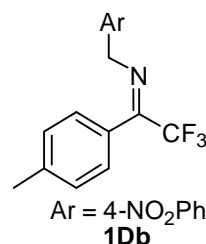

**4-NO<sub>2</sub> benzyl imine 1Db.** This compound was synthesized *via* method A as a white solid in 35% yield after flash chromatography (Hexanes/CH<sub>2</sub>Cl<sub>2</sub> = 20/1 to Hexanes/CH<sub>2</sub>Cl<sub>2</sub> = 1/1). The compound could be stored for months under -50 °C. <sup>1</sup>H NMR (400 MHz, CDCl<sub>3</sub>) δ = 8.19 (d, *J* = 8.7 Hz, 2H), 7.47 (d, *J* = 8.7 Hz, 2H), 7.32 (d, *J* = 7.9 Hz, 2H), 7.18 (d, *J* = 7.9 Hz, 2H), 4.71 (s, 2H), 2.43 (s, 3H); <sup>13</sup>C NMR (100 MHz, CDCl<sub>3</sub>) δ = 160.5 (q, *J*<sub>C-F</sub> = 34.0 Hz), 147.2, 145.8, 141.1, 129.9, 129.6, 128.3, 127.5, 126.9, 124.0, 123.9, 119.7 (q, *J*<sub>C-F</sub> = 278.8 Hz), 56.0, 21.6; <sup>19</sup>F NMR (376 MHz, CDCl<sub>3</sub>) δ = -71.3. IR(CHCl<sub>3</sub>) ν 1667, 1605, 1520, 1341, 1193, 1130, 1036, 843, 736 cm<sup>-1</sup>; HRMS (ESI/[M+H]<sup>+</sup>) Calcd. for C<sub>16</sub>H<sub>14</sub>N<sub>2</sub>O<sub>2</sub>F<sub>3</sub> m/z 323.1007, found m/z 323.0999.

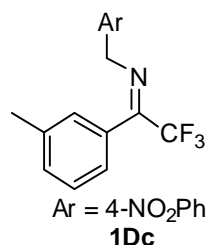

**4-NO<sub>2</sub> benzyl imine 1Dc.** This compound was synthesized *via* method A as a white solid in 50% yield after flash chromatography (Hexanes/CH<sub>2</sub>Cl<sub>2</sub> = 20/1 to Hexanes/CH<sub>2</sub>Cl<sub>2</sub> = 1/1). The compound could be stored for months under -50 °C. <sup>1</sup>H NMR (400 MHz, CDCl<sub>3</sub>) δ = 8.21 (d, *J* = 8.7 Hz, 2H), 7.47 (d, *J* = 8.7 Hz, 2H), 7.40 (t, *J* = 7.5 Hz, 1H), 7.34 (d, *J* = 7.4 Hz, 1H), 7.06 (m, 2H), 4.68 (s, 2H), 2.42 (s, 3H); <sup>13</sup>C NMR (100 MHz, CDCl<sub>3</sub>) δ = 160.6 (q, *J*<sub>C-F</sub> = 34.1 Hz), 147.2, 145.8, 139.2, 131.5, 129.9, 129.1, 128.3, 127.9, 124.6, 123.9, 119.7 (d, *J*<sub>C-F</sub> = 278.7 Hz), 56.0, 21.6; <sup>19</sup>F NMR (376 MHz, CDCl<sub>3</sub>) δ = -71.4. IR(CHCl<sub>3</sub>) ν 1670, 1604, 1520, 1342, 1242, 1194, 1131, 1039, 968, 854, 718 cm<sup>-1</sup>; HRMS (ESI/[M+H]<sup>+</sup>) Calcd. for

C<sub>16</sub>H<sub>14</sub>N<sub>2</sub>O<sub>2</sub>F<sub>3</sub> m/z 323.1007, found m/z 323.1008.

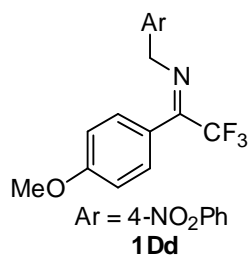

**4-NO<sub>2</sub> benzyl imine 1Dd.** This compound was synthesized *via* method A as a white solid in 49% yield after flash chromatography (Hexanes/CH<sub>2</sub>Cl<sub>2</sub> = 20/1 to Hexanes/CH<sub>2</sub>Cl<sub>2</sub> = 1/1). The compound could be stored for months under -50 °C. <sup>1</sup>H NMR (400 MHz, CDCl<sub>3</sub>) δ = 8.20 (d, *J* = 8.4 Hz, 2H), 7.47 (d, *J* = 8.2 Hz, 2H), 7.25 – 7.21 (m, 2H), 7.01 (d, *J* = 8.1 Hz, 2H), 4.73 (s, 2H), 3.87 (s, 3H); <sup>13</sup>C NMR (100 MHz, CDCl<sub>3</sub>) δ = 161.4, 160.2 (q, *J*<sub>C-F</sub> = 33.9 Hz), 147.3, 146.1, 129.4, 128.4, 124.0, 121.8, 119.9 (q, *J*<sub>C-F</sub> = 278.7 Hz), 114.7, 56.0, 55.6; <sup>19</sup>F NMR (376 MHz, CDCl<sub>3</sub>) δ = -71.2. IR(CHCl<sub>3</sub>) ν 1664, 1604, 1558, 1463, 1340, 1294, 1255, 1176, 1126, 1024, 935, 835, 737 cm<sup>-1</sup>; HRMS (ESI/[M+H]<sup>+</sup>) Calcd. for C<sub>16</sub>H<sub>14</sub>N<sub>2</sub>O<sub>3</sub>F<sub>3</sub> m/z 339.0957, found m/z 339.0950.

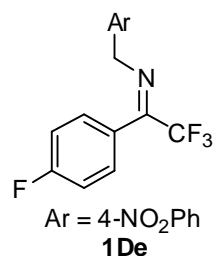

**4-NO<sub>2</sub> benzyl imine 1De.** This compound was synthesized *via* method A as a white solid in 28% yield after flash chromatography (Hexanes/CH<sub>2</sub>Cl<sub>2</sub> = 20/1 to Hexanes/CH<sub>2</sub>Cl<sub>2</sub> = 2/1). The compound could be stored for months under -50 °C. <sup>1</sup>H NMR (400 MHz, CDCl<sub>3</sub>) δ = 8.22 (d, *J* = 8.7 Hz, 2H), 7.47 (d, *J* = 8.8 Hz, 2H), 7.33 – 7.27 (m, 2H), 7.25 – 7.18 (m, 2H), 4.69 (s, 2H); <sup>13</sup>C NMR (100 MHz, CDCl<sub>3</sub>) δ = 164.0 (d, *J*<sub>C-F</sub> = 252.2 Hz), 159.4 (q, *J*<sub>C-F</sub> = 34.3 Hz), 147.4, 145.5, 130.0 (d, *J*<sub>C-F</sub> = 8.5 Hz), 128.3, 125.9, 125.9, 124.0, 119.6 (q, *J*<sub>C-F</sub> = 278.5 Hz), 116.7 (d, *J*<sub>C-F</sub> = 22.0 Hz), 56.1; <sup>19</sup>F NMR (376 MHz, CDCl<sub>3</sub>) δ = -71.4, -108.8; IR(CHCl<sub>3</sub>) ν 3081, 1660, 1601, 1517, 1343, 1226, 1195, 1132, 1007, 838, 771 cm<sup>-1</sup>; HRMS (ESI/[M+H]<sup>+</sup>) Calcd. for C<sub>15</sub>H<sub>11</sub>N<sub>2</sub>O<sub>2</sub>F<sub>4</sub> m/z 327.0757, found m/z 327.0751.

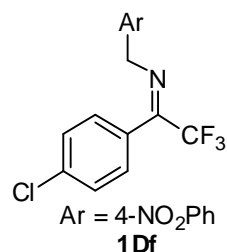

**4-NO<sub>2</sub> benzyl imine 1Df.** This compound was synthesized *via* method A as a white solid after in 62% yield (based on recovered ketone) after flash chromatography (Hexanes/CH<sub>2</sub>Cl<sub>2</sub> = 20/1 to Hexanes/CH<sub>2</sub>Cl<sub>2</sub> = 1/1). The compound could be stored for months under -50 °C. <sup>1</sup>H NMR (400 MHz, CDCl<sub>3</sub>) δ = 8.22 (d, *J* = 8.7 Hz, 2H), 7.51 (d, *J* = 8.4 Hz, 2H), 7.47 (d, *J* = 8.8 Hz, 2H), 7.23 (d, *J* = 8.4 Hz, 2H), 4.68 (s, 2H); <sup>13</sup>C NMR (100 MHz, CDCl<sub>3</sub>) δ = 159.1 (q, *J*<sub>C-F</sub> = 34.5 Hz), 147.2, 145.3, 137.1, 129.6, 129.0, 128.2, 128.1, 123.9, 119.5 (d, *J* = 278.8 Hz), 56.0; <sup>19</sup>F NMR (376 MHz, CDCl<sub>3</sub>) δ = -71.3. IR(CHCl<sub>3</sub>) ν 1918, 1671, 1603, 1519, 1491, 1341, 1192, 1130, 1092, 1014, 937, 830, 767, 737 cm<sup>-1</sup>; HRMS (ESI/[M+H]<sup>+</sup>) Calcd. for C<sub>15</sub>H<sub>11</sub>N<sub>2</sub>O<sub>2</sub>F<sub>3</sub>Cl m/z 343.0461, found m/z 343.0464.

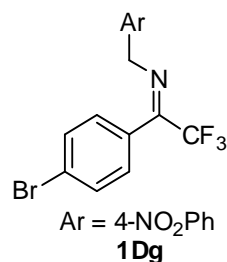

**4-NO<sub>2</sub> benzyl imine 1Dg.** This compound was synthesized *via* method A as a white solid in 37% yield after flash chromatography (Hexanes/CH<sub>2</sub>Cl<sub>2</sub> = 20/1 to Hexanes/CH<sub>2</sub>Cl<sub>2</sub> = 1/2). The compound could be stored for months under -50 °C. <sup>1</sup>H NMR (400 MHz, CDCl<sub>3</sub>) δ 8.19 (d, *J* = 8.6 Hz, 2H), 7.65 (d, *J* = 8.3 Hz, 2H), 7.44 (d, *J* = 8.4 Hz, 2H), 7.14 (d, *J* = 8.3 Hz, 2H), 4.65 (s, 2H). <sup>13</sup>C NMR (100 MHz, CDCl<sub>3</sub>) δ = 159.4 (q, *J*<sub>C-F</sub> = 34.8 Hz), 147.4, 145.3, 132.7, 129.3, 128.7, 128.3, 125.6, 124.1, 119.5 (d, *J*<sub>C-F</sub> = 278.6 Hz), 56.2; <sup>19</sup>F



NMR (376 MHz, CDCl<sub>3</sub>)  $\delta$  = -71.4. IR(CHCl<sub>3</sub>)  $\nu$  1671, 1603, 1518, 1487, 1341, 1191, 1130, 1072, 1011, 937, 825, 736 cm<sup>-1</sup>; HRMS (EI/[M]<sup>+</sup>) Calcd. for C<sub>15</sub>H<sub>10</sub>BrF<sub>3</sub>N<sub>2</sub>O<sub>2</sub> m/z 385.9878, found m/z 385.9808.

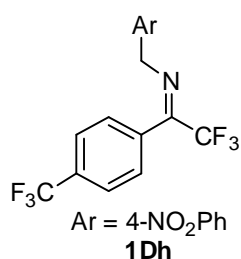

**4-NO<sub>2</sub> benzyl imine 1Dh.** This compound was synthesized *via* method A as a white solid after in 63% yield after flash chromatography (Hexanes/CH<sub>2</sub>Cl<sub>2</sub> = 20/1 to Hexanes/CH<sub>2</sub>Cl<sub>2</sub> = 1/1). The compound could be stored for months under -50 °C. <sup>1</sup>H NMR (400 MHz, CDCl<sub>3</sub>)  $\delta$  = 8.20 (d,  $J$  = 8.6 Hz, 2H), 7.79 (d,  $J$  = 8.3 Hz, 2H), 7.46 (d,  $J$  = 8.4 Hz, 2H), 7.41 (d,  $J$  = 8.1 Hz, 2H), 4.64 (s, 2H); <sup>13</sup>C NMR (100 MHz, CDCl<sub>3</sub>)  $\delta$  = 159.0 (q,  $J_{C-F}$  = 34.8 Hz), 147.4, 145.2, 133.6, 132.9 (q,  $J_{C-F}$  = 33.0 Hz), 128.4, 128.3, 126.5 (q,  $J_{C-F}$  = 3.7 Hz), 125.0 (q,  $J_{C-F}$  = 266.7 Hz), 124.0, 119.5 (q,  $J_{C-F}$  = 278.6 Hz), 56.2; <sup>19</sup>F NMR (376 MHz, CDCl<sub>3</sub>)  $\delta$  = -63.6, -71.4. IR(CHCl<sub>3</sub>)  $\nu$  1672, 1605, 1520, 1323, 1195, 1124, 1066, 1016, 942, 842, 736, 695 cm<sup>-1</sup>; HRMS (ESI/[M+H]<sup>+</sup>) Calcd. for C<sub>16</sub>H<sub>11</sub>N<sub>2</sub>O<sub>2</sub>F<sub>6</sub> m/z 377.0725, found m/z 377.0726.

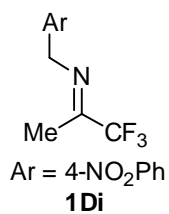

**4-NO<sub>2</sub> benzyl imine 1Di.** This compound was synthesized *via* method B as a yellow liquid which was solidified as a yellow solid at -50 °C in 33% yield after flash chromatography (Hexanes/CH<sub>2</sub>Cl<sub>2</sub> = 20/1 to Hexanes/CH<sub>2</sub>Cl<sub>2</sub> = 1/1). The compound could be stored for months under -50 °C. <sup>1</sup>H NMR (400 MHz, CDCl<sub>3</sub>)  $\delta$  = 8.23 (d,  $J$  = 8.7 Hz, 2H), 7.57 (d,  $J$  = 8.7 Hz, 2H), 4.72 (s, 2H), 2.15 (s, 3H); <sup>13</sup>C NMR (100 MHz, CDCl<sub>3</sub>)  $\delta$  = 158.3 (q,  $J_{C-F}$  = 33.7 Hz), 147.2, 145.8, 128.3, 123.9, 119.7 (q,  $J_{C-F}$  = 278.1 Hz), 54.3, 13.5; <sup>19</sup>F NMR (376 MHz, CDCl<sub>3</sub>)  $\delta$  = -75.1; IR(CHCl<sub>3</sub>)  $\nu$  1688, 1606, 1518, 1339, 1195, 1118, 1050, 842, 736 cm<sup>-1</sup>; HRMS (EI/[M]<sup>+</sup>) Calcd. for C<sub>10</sub>H<sub>9</sub>O<sub>2</sub>N<sub>2</sub>F<sub>3</sub> m/z 246.0616, found m/z 246.0613.

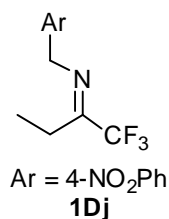

**4-NO<sub>2</sub> benzyl imine 1Dj.** This compound was synthesized *via* a modified procedure from method A. To the mixture of 4-NO<sub>2</sub> benzyl amine (5.0 mmol) and acetic acid (5.0 mmol) in benzene (5.0 mL) was added the solution of trifluoromethyl ketone (5.0 mmol) in benzene (1.0 mL) in one portion. Then 500 mg 4 Å MS was added. The mixture was refluxed for 24h. After cooling down to rt, CH<sub>2</sub>Cl<sub>2</sub> (20.0 mL) was added and the mixture was washed with NaHCO<sub>3</sub> (sat., 10.0 mL). The aqueous layer was extracted with CH<sub>2</sub>Cl<sub>2</sub> (20 mL×2). The organic solvents were combined, washed with brine, dried over Na<sub>2</sub>SO<sub>4</sub> and concentrated. The yellow residue was applied to silica gel column chromatography (Hexanes/CH<sub>2</sub>Cl<sub>2</sub> = 20/1 to Hexanes/CH<sub>2</sub>Cl<sub>2</sub> = 1/1) to afford **4-NO<sub>2</sub> benzyl imine 1Dj** as a yellow liquid which was solidified as a yellow solid at -50 °C in 23% yield after flash chromatography (Hexanes/CH<sub>2</sub>Cl<sub>2</sub> = 20/1 to Hexanes/CH<sub>2</sub>Cl<sub>2</sub> = 1/1). The compound could be stored for months under -50 °C. <sup>1</sup>H NMR (400 MHz, CDCl<sub>3</sub>)  $\delta$  = 8.23 (d,  $J$  = 8.8 Hz, 2H), 7.55 (d,  $J$  = 8.4 Hz, 2H), 4.80 (s, 2H), 2.57 (q,  $J$  = 7.7 Hz, 2H), 1.22 (t,  $J$  = 7.7 Hz, 3H); <sup>13</sup>C NMR (100 MHz, CDCl<sub>3</sub>)  $\delta$  = 162.8 (q,  $J_{C-F}$  = 32.2 Hz), 147.2, 145.9, 128.2, 123.8, 120.0 (q,  $J_{C-F}$  = 279.3 Hz), 53.5, 21.0, 10.4; <sup>19</sup>F NMR (376 MHz, CDCl<sub>3</sub>)  $\delta$  = -73.4;

IR(CHCl<sub>3</sub>)  $\nu$  2967, 2847, 1707, 1604, 1521, 1344, 1197, 1126, 1052, 936, 850, 816 cm<sup>-1</sup>; HRMS (EI/[M]<sup>+</sup>) Calcd. for C<sub>11</sub>H<sub>11</sub>O<sub>2</sub>N<sub>2</sub>F<sub>3</sub> m/z 260.0773, found m/z 260.0769.

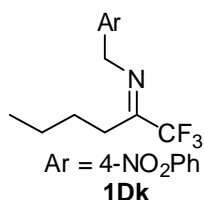

**4-NO<sub>2</sub> benzyl imine 1Dk.** This compound was synthesized *via* method B as a yellow liquid in 41% yield after flash chromatography (Hexanes/CH<sub>2</sub>Cl<sub>2</sub> = 20/1 to Hexanes/CH<sub>2</sub>Cl<sub>2</sub> = 1/1). The compound could be stored for months under -50 °C. <sup>1</sup>H NMR (400 MHz, CDCl<sub>3</sub>)  $\delta$  = 8.23 (d, *J* = 8.7 Hz, 2H), 7.55 (d, *J* = 8.8 Hz, 2H), 4.79 (s, 2H), 2.60 – 2.44 (m, 2H), 1.68 – 1.50 (m, 2H), 1.50 – 1.32 (m, 2H), 0.97 (t, *J* = 7.3 Hz, 3H); <sup>13</sup>C NMR (100 MHz, CDCl<sub>3</sub>)  $\delta$  = 162.0 (q, *J*<sub>C-F</sub> = 32.3 Hz), 147.1, 146.0, 128.2, 123.7, 119.9 (q, *J*<sub>C-F</sub> = 279.5 Hz), 53.6, 28.0, 27.6, 23.0, 13.6; <sup>19</sup>F NMR (376 MHz, CDCl<sub>3</sub>)  $\delta$  = -73.2; IR(CHCl<sub>3</sub>)  $\nu$  2964, 2875, 1683, 1605, 1520, 1342, 1188, 1127, 1076, 980, 841, 737 cm<sup>-1</sup>; HRMS (ESI/[M+H]<sup>+</sup>) Calcd. for C<sub>13</sub>H<sub>16</sub>N<sub>2</sub>O<sub>2</sub>F<sub>3</sub> m/z 289.1164, found m/z 289.1155.

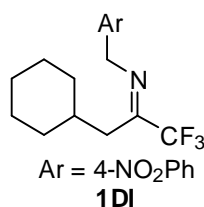

**4-NO<sub>2</sub> benzyl imine 1DI.** This compound was synthesized *via* method B as a yellow solid in 18% yield after flash chromatography (Hexanes/CH<sub>2</sub>Cl<sub>2</sub> = 5/1 to Hexanes/CH<sub>2</sub>Cl<sub>2</sub> = 1/1). The compound could be stored for months under -50 °C. <sup>1</sup>H NMR (400 MHz, CDCl<sub>3</sub>)  $\delta$  = 8.23 (d, *J* = 8.7 Hz, 2H), 7.55 (d, *J* = 8.7 Hz, 2H), 4.79 (s, 2H), 2.44 (d, *J* = 7.3 Hz, 2H), 1.84 – 1.61 (m, 5H), 1.35 – 0.73 (m, 6H); <sup>13</sup>C NMR (100 MHz, CDCl<sub>3</sub>)  $\delta$  = 161.5 (q, *J*<sub>C-F</sub> = 32.1 Hz), 147.2, 146.3, 128.3, 123.8, 119.9 (d, *J*<sub>C-F</sub> = 279.9 Hz), 54.4, 36.2, 35.6, 33.6, 26.3, 26.1; <sup>19</sup>F NMR (376 MHz, CDCl<sub>3</sub>)  $\delta$  = -72.0; IR(CHCl<sub>3</sub>)  $\nu$  2926, 2853, 1682, 1604, 1520, 1450, 1340, 1186, 1130, 1090, 839, 737 cm<sup>-1</sup>; HRMS (ESI/[M+H]<sup>+</sup>) Calcd. for C<sub>16</sub>H<sub>20</sub>N<sub>2</sub>O<sub>2</sub>F<sub>3</sub> m/z 329.1477, found m/z 329.1487.

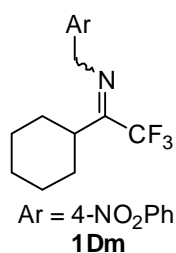

**4-NO<sub>2</sub> benzyl imine 1Dm.** This compound was synthesized *via* a modified procedure from method A. To the mixture of 4-NO<sub>2</sub> benzyl amine (3.0 mmol) and acetic acid (3.0 mmol) in benzene (3.0 mL) was added the solution of trifluoromethyl ketone (3.0 mmol) in benzene (1.0 mL) in one portion. The mixture was refluxed with Dean-Stark apparatus for 24h. After cooling down to rt, CH<sub>2</sub>Cl<sub>2</sub> (20.0 mL) was added and the mixture was washed with NaHCO<sub>3</sub> (sat., 10.0 mL). The aqueous layer was extracted with CH<sub>2</sub>Cl<sub>2</sub> (20 mL×2). The organic solvents were combined, washed with brine, dried over Na<sub>2</sub>SO<sub>4</sub> and concentrated. The yellow residue was applied to silica gel column chromatography (Hexanes/CH<sub>2</sub>Cl<sub>2</sub> = 20/1 to Hexanes/CH<sub>2</sub>Cl<sub>2</sub> = 1/1) to afford **4-NO<sub>2</sub> benzyl imine 1Dm** as a mixture of E/Z imine stereoisomers (2/1 ratio) in 32% yield as a yellow solid after flash chromatography (Hexanes/CH<sub>2</sub>Cl<sub>2</sub> = 20/1 to Hexanes/CH<sub>2</sub>Cl<sub>2</sub> = 1/1) (About 6% enamine was also present, but it won't affect the isomerization.). The compound could be stored for months under -50 °C. <sup>1</sup>H NMR (400 MHz, CDCl<sub>3</sub>)  $\delta$  = Major isomer: 8.22 (d, *J* = 8.3 Hz, 2H), 7.56 (d, *J* = 8.3 Hz, 2H), 4.83 (s, 2H), 2.81 (t, *J* = 12.1 Hz, 1H), 2.00 – 1.58 (m, 6H), 1.45 – 1.08 (m, 4H); Minor isomer: 4.90 (s, 2H), 2.60 (t, *J* = 9.7 Hz, 1H); <sup>13</sup>C NMR (100 MHz, CDCl<sub>3</sub>)  $\delta$  = Major isomer: 164.2 (q, *J*

$J_{C-F} = 30.4$  Hz), 147.3, 146.4, 128.3, 123.9, 120.3 (q,  $J = 280.9$  Hz), 53.3, 40.2, 30.6, 28.5, 26.3, 25.7. Minor isomer: 162.4 (q,  $J_{C-F} = 25.7$  Hz), 128.2, 123.8, 54.6, 54.5, 43.2, 30.1, 26.2, 26.0.  $^{19}\text{F}$  NMR (376 MHz,  $\text{CDCl}_3$ )  $\delta$  = Minor: -65.6, Major: -69.2; IR( $\text{CHCl}_3$ )  $\nu$  2937, 2860, 1675, 1520, 1468, 1342, 1192, 1120, 1017, 843, 738  $\text{cm}^{-1}$ ; HRMS (ESI/[ $\text{M}+\text{H}$ ] $^+$ ) Calcd. for  $\text{C}_{15}\text{H}_{18}\text{N}_2\text{O}_2\text{F}_3$   $m/z$  315.1320, found  $m/z$  315.1318.

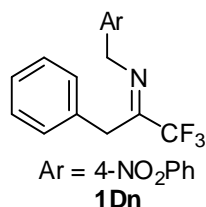

**4-NO<sub>2</sub> benzyl imine 1Dn.** This compound was synthesized *via* method B as a yellow solid in 39% yield after flash chromatography (Hexanes/ $\text{CH}_2\text{Cl}_2 = 20/1$  to Hexanes/ $\text{CH}_2\text{Cl}_2 = 3/2$ ). The compound could be stored for months under -50 °C.  $^1\text{H}$  NMR (400 MHz,  $\text{CDCl}_3$ )  $\delta$  = 8.19 (d,  $J = 8.6$  Hz, 2H), 7.45 (d,  $J = 8.6$  Hz, 2H), 7.39 – 7.28 (m, 3H), 7.17 (d,  $J = 7.3$  Hz, 2H), 4.73 (s, 2H), 3.94 (s, 2H);  $^{13}\text{C}$  NMR (100 MHz,  $\text{CDCl}_3$ )  $\delta$  = 159.2 (q,  $J_{C-F} = 32.9$  Hz), 147.0, 145.5,

133.2, 129.2, 128.2, 127.3, 123.6, 119.7 (d,  $J_{C-F} = 279.1$  Hz), 54.4, 33.7;  $^{19}\text{F}$  NMR (376 MHz,  $\text{CDCl}_3$ )  $\delta$  = -73.2; IR( $\text{CHCl}_3$ )  $\nu$  3032, 2936, 1683, 1603, 1518, 1455, 1341, 1193, 1126, 1088, 997, 840, 735  $\text{cm}^{-1}$ ; HRMS (EI/[ $\text{M}$ ] $^+$ ) Calcd. for  $\text{C}_{16}\text{H}_{13}\text{O}_2\text{N}_2\text{F}_3$   $m/z$  322.0929, found  $m/z$  322.0923.

### 3. Isomerization of trifluoromethyl imines

Synthesis of racemic trifluoromethylated amines:

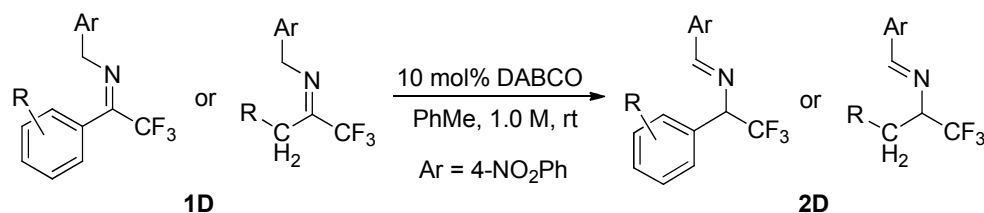

To the solution of trifluoromethyl imine **1D** (0.05 mmol) in PhMe (0.05 mL) was added DABCO (0.005 mmol), the mixture was stirred at room temperature for 2h (for aryl trifluoromethyl imines) or 12h (for alkyl trifluoromethyl imines) until all the imine was isomerized. The reaction was stopped by passing the reaction mixture through a plug of silica gel to remove DABCO. The silica gel plug was then washed with diethyl ether (1.0-2.0 mL). The solvent was evaporated *in vacuo* to afford the pure racemic trifluoromethylated amine **2D** in over 90% yield.

General procedure for the asymmetric isomerization of trifluoromethyl imines:

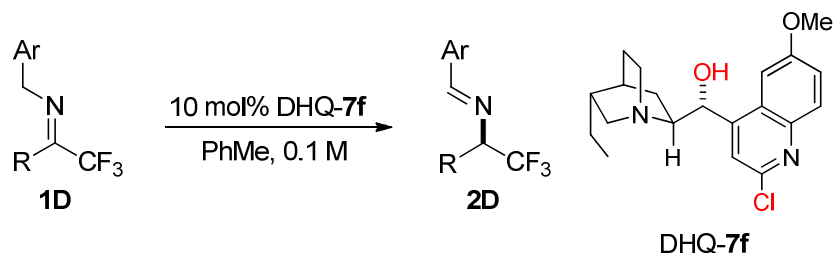

To the solution of trifluoromethyl imine **1D** (0.20 mmol) in toluene (2.0 mL) was added 4 Å MS (20 mg). The suspension was stirred at room temperature for 10 min before being moved into the specified temperature in the Table. After the mixture was fully chilled, the solution of DHQ-7f (0.02 mmol) in CH<sub>2</sub>Cl<sub>2</sub> (0.02 mL) was added in one portion. Then the mixture was allowed to stir for the designated time in Table 3 & 4. The reaction was stopped by passing the reaction mixture through a plug of silica gel to remove the catalyst. The silica gel plug was then washed with diethyl ether (2.0-4.0 mL). The filtrate was concentrated *in vacuo* to give a residue, which is purified by column chromatography on MeOH/Et<sub>3</sub>N deactivated silica (eluent: Hexanes/CH<sub>2</sub>Cl<sub>2</sub> = 20/1 to 1/1) to yield the corresponding trifluoromethylated amines **2D**.

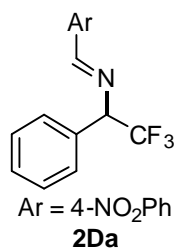

**Trifluoromethylated amine 2Da.** The product was obtained as a white solid in 75% yield after flash chromatography (Hexanes/CH<sub>2</sub>Cl<sub>2</sub> = 20/1 to Hexanes/CH<sub>2</sub>Cl<sub>2</sub> = 1/1) and 90% ee<sup>10</sup> as determined by HPLC analysis [Daicel Chiralpak AD, Hexanes/IPA=80/20, 1.0 ml/min, λ 254 nm, t(major) = 8.66 min, t(minor) = 12.39 min] from a reaction catalyzed by DHQ-7f (10 mol%) at -30°C for 48h. [α]<sub>D</sub><sup>23</sup> = +205.3 (c = 0.53, CHCl<sub>3</sub>); <sup>1</sup>H NMR (400 MHz, CDCl<sub>3</sub>) δ = 8.45 (s, 1H), 8.27 (d, *J* = 8.0 Hz, 2H), 7.99 (d, *J* = 8.3 Hz, 2H), 7.52 (d, *J* = 4.6 Hz, 2H), 7.46 – 7.29 (m, 3H), 4.84 (q, *J* = 7.5 Hz, 1H); <sup>13</sup>C NMR (100 MHz, CDCl<sub>3</sub>) δ = 163.9, 149.8, 140.8, 134.5, 129.7, 129.5, 129.0, 124.7 (q, *J*<sub>C-F</sub> = 280.9 Hz), 124.1, 75.3 (q, *J*<sub>C-F</sub> = 28.8 Hz); <sup>19</sup>F NMR (376 MHz, CDCl<sub>3</sub>) δ = -74.1 (d, *J* = 7.1 Hz); IR(CHCl<sub>3</sub>) ν 2879, 1650, 1603, 1523, 1455, 1386, 1345, 1258, 1167, 1124, 1051, 871, 708 cm<sup>-1</sup>; HRMS (ESI/[M+H]<sup>+</sup>) Calcd. for C<sub>15</sub>H<sub>12</sub>N<sub>2</sub>O<sub>2</sub>F<sub>3</sub> m/z 309.0851, found m/z 309.0860.

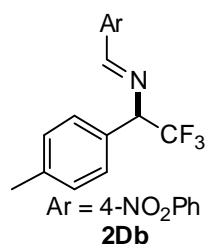

**Trifluoromethylated amine 2Db.** The product was obtained as a light yellow liquid in 76% yield after flash chromatography (Hexanes/CH<sub>2</sub>Cl<sub>2</sub> = 20/1 to Hexanes/CH<sub>2</sub>Cl<sub>2</sub> = 1/1) and 90% ee as determined by HPLC analysis [Daicel Chiralcel OJ-H, Hexanes/IPA=70/30, 1.0 ml/min, λ 254 nm, t(major) = 21.64 min, t(minor) = 17.55 min] from a reaction catalyzed by DHQ-7f (10 mol%) at -30°C for 72h. [α]<sub>D</sub><sup>23</sup> = +143.2 (c = 0.32, CHCl<sub>3</sub>); <sup>1</sup>H NMR (400 MHz, CDCl<sub>3</sub>) δ = 8.46 (s, 1H), 8.30 (d, *J* = 8.4 Hz, 2H), 8.01 (d, *J* = 8.3 Hz, 2H), 7.42 (d, *J* = 7.9 Hz, 2H), 7.23 (d, *J* = 8.0 Hz, 2H), 4.84 (q, *J* = 7.4 Hz, 1H), 2.37 (s, 3H); <sup>13</sup>C NMR (100 MHz, CDCl<sub>3</sub>) δ = 163.5, 149.7, 140.7, 139.4, 131.4, 129.6, 128.7, 124.6 (q, *J*<sub>C-F</sub> = 280.6 Hz), 124.0, 74.9 (q, *J*<sub>C-F</sub> = 28.8 Hz), 21.4; <sup>19</sup>F NMR (376 MHz, CDCl<sub>3</sub>) δ = -74.3 (d, *J* = 7.1 Hz); IR(CHCl<sub>3</sub>) ν 1649, 1602, 1523, 1345, 1257, 1164, 1125, 1058, 857, 806 cm<sup>-1</sup>; HRMS (ESI/[M+H]<sup>+</sup>) Calcd.

for  $C_{16}H_{14}N_2O_2F_3$   $m/z$  323.1007, found  $m/z$  323.0999.

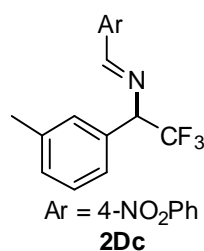

**Trifluoromethylated amine 2Dc.** This product was obtained as a light yellow liquid in 70% yield after flash chromatography (from Hexanes/CH<sub>2</sub>Cl<sub>2</sub> = 20/1 to Hexanes/CH<sub>2</sub>Cl<sub>2</sub> = 1/1) and 90% ee as determined by HPLC analysis [Daicel Chiralpak OJ-H, Hexanes/IPA=80/20, 1.0 ml/min,  $\lambda$  254nm, t(major) = 28.39 min, t(minor) = 18.96 min] from a reaction catalyzed by DHQ-7f (10 mol%) at -30°C for 72h.  $[\alpha]_D^{23} = +160.3$  (c = 0.30, CHCl<sub>3</sub>); <sup>1</sup>H NMR (400 MHz, CDCl<sub>3</sub>)  $\delta$  8.46 (s, 1H), 8.30 (d,  $J = 8.5$  Hz, 2H), 8.01 (d,  $J = 8.5$  Hz, 2H), 7.38 – 7.28 (m, 3H), 7.24 – 7.17 (m, 1H), 4.83 (q,  $J = 7.4$  Hz, 1H), 2.39 (s, 3H); <sup>13</sup>C NMR (100 MHz, CDCl<sub>3</sub>)  $\delta = 163.6, 149.6, 140.6, 138.7, 134.2, 130.1, 129.6, 129.4, 128.7, 125.9, 124.5$  (q,  $J_{C-F} = 280.8$  Hz), 124.0, 75.2 (q,  $J_{C-F} = 28.8$  Hz), 21.5; <sup>19</sup>F NMR (376 MHz, CDCl<sub>3</sub>)  $\delta = -74.1$  (d,  $J = 6.9$  Hz); IR (CHCl<sub>3</sub>)  $\nu$  2872, 2360, 1649, 1603, 1524, 1346, 1260, 1168, 1125, 1057, 857, 713 cm<sup>-1</sup>; HRMS (ESI/[M+H]<sup>+</sup>) Calcd. for  $C_{16}H_{14}F_3N_2O_2$  requires  $m/z$  323.1007, found  $m/z$  323.1001.

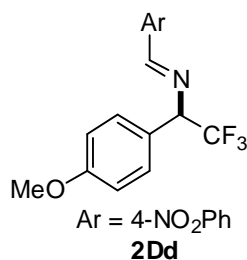

**Trifluoromethylated amine 2Dd.** The product was obtained as a light yellow liquid in 71% yield after flash chromatography (Hexanes/CH<sub>2</sub>Cl<sub>2</sub> = 20/1 to Hexanes/CH<sub>2</sub>Cl<sub>2</sub> = 1/1) and 90% ee as determined by HPLC analysis [Daicel Chiralpak AD, Hexanes/IPA=80/20, 1.0 ml/min,  $\lambda$  254 nm, t(major) = 12.43 min, t(minor) = 14.53 min] from a reaction catalyzed by DHQ-7f (10 mol%) at -10°C for 24h.  $[\alpha]_D^{23} = +173.1$  (c = 0.15, CHCl<sub>3</sub>); <sup>1</sup>H NMR (400 MHz, CDCl<sub>3</sub>)  $\delta = 8.43$  (s, 1H), 8.27 (d,  $J = 8.7$  Hz, 2H), 7.98 (d,  $J = 8.8$  Hz, 2H), 7.43 (d,  $J = 8.6$  Hz, 2H), 6.91 (d,  $J = 8.8$  Hz, 2H), 4.80 (q,  $J = 7.4$  Hz, 1H), 3.79 (s, 3H); <sup>13</sup>C NMR (100 MHz, CDCl<sub>3</sub>)  $\delta = 163.5, 160.4, 149.8, 140.8, 130.1, 129.7, 126.4, 124.7$  (q,  $J_{C-F} = 280.7$  Hz), 124.1, 114.4, 74.7 (q,  $J_{C-F} = 29.0$  Hz), 55.5; <sup>19</sup>F NMR (376 MHz, CDCl<sub>3</sub>)  $\delta = -74.5$  (d,  $J = 6.9$  Hz); IR(CHCl<sub>3</sub>)  $\nu$  2843, 1650, 1603, 1515, 1346, 1250, 1165, 1125, 1058, 1032, 813, 749 cm<sup>-1</sup>; HRMS (ESI/[M+H]<sup>+</sup>) Calcd. for  $C_{16}H_{14}F_3N_2O_3$   $m/z$  339.0957, found  $m/z$  339.0957.

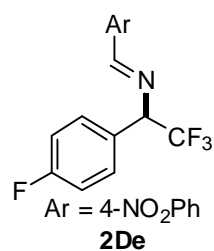

**Trifluoromethylated amine 2De.** The product was obtained as a white solid in 79% yield after flash chromatography (Hexanes/CH<sub>2</sub>Cl<sub>2</sub> = 20/1 to Hexanes/CH<sub>2</sub>Cl<sub>2</sub> = 1/1) and 91% ee as determined by HPLC analysis [Daicel Chiralcel OJ-H, Hexanes/IPA=70/30, 1.0 ml/min,  $\lambda$  254 nm, t(major) = 20.97 min, t(minor) = 13.18 min] from a reaction catalyzed by DHQ-7f (10 mol%) at -30°C for 48h.  $[\alpha]_D^{23} = +188.6$  (c = 0.44, CHCl<sub>3</sub>); <sup>1</sup>H NMR (400 MHz, CDCl<sub>3</sub>)  $\delta = 8.48$  (s, 1H), 8.31 (d,  $J = 8.8$  Hz, 2H), 8.02 (d,  $J = 8.8$  Hz, 2H), 7.54 (dd,  $J = 8.6, 5.4$  Hz, 2H), 7.11 (t,  $J = 8.7$  Hz, 2H), 4.85 (q,  $J = 7.3$  Hz, 1H); <sup>13</sup>C NMR (100 MHz, CDCl<sub>3</sub>)  $\delta = 164.0, 163.4$  (d,  $J_{C-F} = 248.4$  Hz), 149.9, 140.6, 130.7 (d,  $J_{C-F} = 8.3$  Hz), 130.2, 129.8, 124.2, 124.4 (q,  $J_{C-F} = 280.9$  Hz), 116.0 (d,  $J_{C-F} = 21.7$  Hz), 74.6 (q,  $J_{C-F} = 29.1$  Hz); <sup>19</sup>F NMR (376 MHz, CDCl<sub>3</sub>)  $\delta = -74.52$  (d,  $J = 7.0$  Hz), -112.5; IR(CHCl<sub>3</sub>) 1650, 1604, 1525, 1511, 1346, 1258, 1168, 1126, 1058, 876, 856, 749 cm<sup>-1</sup>; HRMS (ESI/[M+H]<sup>+</sup>) Calcd. for

C<sub>15</sub>H<sub>11</sub>N<sub>2</sub>O<sub>2</sub>F<sub>4</sub> m/z 327.0757, found m/z 327.0752.

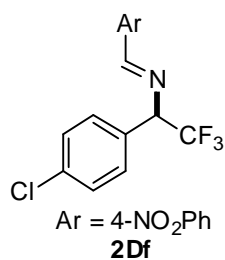

**Trifluoromethylated amine 2Df.** This product was obtained as a white solid in 69% yield after flash chromatography (from Hexanes/CH<sub>2</sub>Cl<sub>2</sub>/diethyl ether = 20/1/0.01 to Hexanes/CH<sub>2</sub>Cl<sub>2</sub>/diethyl ether = 1/1/0.01) and 88% ee as determined by HPLC analysis [Daicel chiralcel OJ-H, Hexanes/IPA=80/20, 1.0 ml/min, λ 254nm, t(major) = 18.22 min, t(minor) = 14.92 min] from a reaction catalyzed by DHQ-7f (10 mol%) at -50°C for 72h. [α]<sub>D</sub><sup>23</sup> = +199.4 (c = 0.46, CHCl<sub>3</sub>); <sup>1</sup>H NMR (400 MHz, CDCl<sub>3</sub>) δ 8.48 (s, 1H), 8.31 (d, *J* = 8.8 Hz, 2H), 8.06 – 7.95 (m, 2H), 7.50 (d, *J* = 8.4 Hz, 2H), 7.40 (d, *J* = 8.5 Hz, 2H), 4.84 (q, *J* = 7.3 Hz, 1H); <sup>13</sup>C NMR (100 MHz, CDCl<sub>3</sub>) δ 164.2, 149.9, 140.5, 135.5, 132.8, 130.3, 129.8, 129.2, 124.3 (q, *J*<sub>C-F</sub> = 281.0 Hz), 124.2, 74.6 (q, *J*<sub>C-F</sub> = 29.1 Hz); <sup>19</sup>F NMR (376 MHz, CDCl<sub>3</sub>) δ -74.4 (d, *J* = 6.8 Hz); IR (CHCl<sub>3</sub>) ν 2876, 1650, 1602, 1523, 1492, 1345, 1257, 1167, 1126, 1091, 1016, 873, 808 cm<sup>-1</sup>; HRMS (ESI/[M+H]<sup>+</sup>) Calcd. for C<sub>15</sub>H<sub>11</sub>N<sub>2</sub>O<sub>2</sub>F<sub>3</sub>Cl requires m/z 343.0461, found m/z 343.0456.

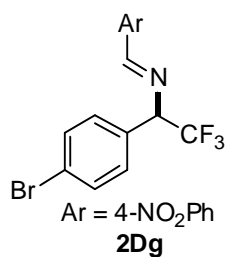

**Trifluoromethylated amine 2Dg.** The product was obtained as a white solid in 79% yield after flash chromatography (Hexanes/CH<sub>2</sub>Cl<sub>2</sub> = 20/1 to Hexanes/CH<sub>2</sub>Cl<sub>2</sub> = 1/1) and 86% ee as determined by HPLC analysis [Daicel Chiralcel OJ-H, Hexanes/IPA=80/20, 1.0 ml/min, λ 254 nm, t(major) = 17.10 min, t(minor) = 15.12 min] from a reaction catalyzed by DHQ-7f (10 mol%) at -30°C for 48h. [α]<sub>D</sub><sup>23</sup> = +163.5 (c = 0.46, CHCl<sub>3</sub>); <sup>1</sup>H NMR (400 MHz, CDCl<sub>3</sub>) δ = 8.45 (s, 1H), 8.28 (d, *J* = 8.8 Hz, 1H), 8.06 – 7.92 (m, 2H), 7.60 – 7.49 (m, 2H), 7.41 (d, *J* = 8.4 Hz, 2H), 4.80 (q, *J* = 7.2 Hz, 1H); <sup>13</sup>C NMR (100 MHz, CDCl<sub>3</sub>) δ = 164.2, 149.8, 140.4, 133.2, 132.1, 130.4, 129.7, 124.1 (q, *J*<sub>C-F</sub> = 281.2 Hz), 124.0, 123.6, 74.6 (q, *J*<sub>C-F</sub> = 29.1 Hz); <sup>19</sup>F NMR (376 MHz, CDCl<sub>3</sub>) δ = -74.4 (d, *J* = 7.4 Hz); IR(CHCl<sub>3</sub>) ν 2878, 1650, 1603, 1522, 1344, 1256, 1167, 1126, 1057, 1012, 873, 806, 749cm<sup>-1</sup>; HRMS (ESI/[M+H]<sup>+</sup>) Calcd. for C<sub>15</sub>H<sub>11</sub>N<sub>2</sub>O<sub>2</sub>F<sub>3</sub>Br m/z 386.9956, found m/z 386.9956.

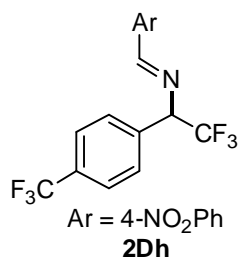

**Trifluoromethylated amine 2Dh.** The product was obtained as a white solid in 81% yield after flash chromatography (Hexanes/CH<sub>2</sub>Cl<sub>2</sub> = 20/1 to Hexanes/CH<sub>2</sub>Cl<sub>2</sub> = 1/1) and 80% ee as determined by HPLC analysis [Daicel Chiralpak AD, Hexanes/IPA = 90/10, 1.0 ml/min, λ 254 nm, t(major) = 11.44 min, t(minor) = 12.97 min] from a reaction catalyzed by DHQ-7f (10 mol%) at -50°C for 72h. [α]<sub>D</sub><sup>23</sup> = +150.1 (c = 0.46, CHCl<sub>3</sub>); <sup>1</sup>H NMR (400 MHz, CDCl<sub>3</sub>) δ = 8.48 (s, 1H), 8.29 (d, *J* = 8.7 Hz, 2H), 8.01 (d, *J* = 8.7 Hz, 2H), 7.76 – 7.58 (m, 4H), 4.90 (q, *J* = 7.2 Hz, 1H); <sup>13</sup>C NMR (100 MHz, CDCl<sub>3</sub>) δ = 164.5, 149.9, 140.3, 138.1, 131.6 (q, *J*<sub>C-F</sub> = 32.8 Hz), 129.8, 129.3, 125.8 (dd, *J*<sub>C-F</sub> = 7.4, 3.7 Hz), 124.1, 123.9 (q, *J*<sub>C-F</sub> = 268.1 Hz), 74.8 (q, *J*<sub>C-F</sub> = 29.2 Hz); <sup>19</sup>F NMR (376 MHz, CDCl<sub>3</sub>) δ = -63.3, -74.1 (d, *J* = 6.9 Hz); IR(CHCl<sub>3</sub>) ν 2875, 1651, 1604, 1525, 1347, 1325, 1257, 1167, 1126, 1069, 1020, 857, 814 cm<sup>-1</sup>; HRMS (ESI/[M+H]<sup>+</sup>) Calcd. for C<sub>16</sub>H<sub>11</sub>N<sub>2</sub>O<sub>2</sub>F<sub>6</sub> m/z 377.0725, found m/z 377.0729.

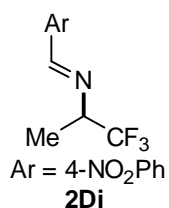

**Trifluoromethylated amine 2Di.** The product was obtained as a yellow solid in 61% yield after flash chromatography (Hexanes/CH<sub>2</sub>Cl<sub>2</sub> = 20/1 to Hexanes/CH<sub>2</sub>Cl<sub>2</sub> = 2/1) and 90% ee as determined by HPLC analysis [Daicel Chiralcel OJ-H, Hexanes/IPA=97/3, 1.0 ml/min,  $\lambda$  254 nm, t(major) = 15.82 min, t(minor) = 15.00 min] from a reaction catalyzed by DHQ-7f (10 mol%) at 10 °C for 48h.  $[\alpha]_D^{23} = +73.7$  (c = 0.19, CHCl<sub>3</sub>); <sup>1</sup>H NMR (400 MHz, CDCl<sub>3</sub>)  $\delta$  = 8.40 (s, 1H), 8.30 – 8.23 (m, 2H), 7.97 – 7.87 (m, 2H), 3.89 (dq, *J* = 13.7, 6.8 Hz, 1H), 1.45 (d, *J* = 6.7 Hz, 3H); <sup>13</sup>C NMR (100 MHz, CDCl<sub>3</sub>)  $\delta$  = 162.3, 149.6, 140.7, 129.5, 125.4 (d, *J*<sub>C-F</sub> = 281.4 Hz), 124.3, 66.7 (q, *J*<sub>C-F</sub> = 28.9 Hz), 15.8 (d, *J*<sub>C-F</sub> = 2.0 Hz); <sup>19</sup>F NMR (376 MHz, CDCl<sub>3</sub>)  $\delta$  = -76.7 (d, *J* = 7.6 Hz); IR(CHCl<sub>3</sub>)  $\nu$  2886, 1651, 1603, 1524, 1453, 1346, 1270, 1172, 1146, 1124, 1084, 1020, 855, 750 cm<sup>-1</sup>; HRMS (ESI/[M+H]<sup>+</sup>) Calcd. for C<sub>10</sub>H<sub>10</sub>N<sub>2</sub>O<sub>2</sub>F<sub>3</sub> m/z 247.0694, found m/z 247.0691.

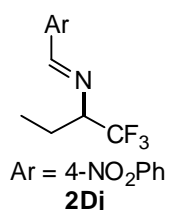

**Trifluoromethylated amine 2Dj.** The product was obtained as a yellow liquid in 66% yield after flash chromatography (Hexanes/CH<sub>2</sub>Cl<sub>2</sub> = 20/1 to Hexanes/CH<sub>2</sub>Cl<sub>2</sub> = 3/2) and 93% ee as determined by HPLC analysis [Daicel Chiralcel AS-H, Hexanes/IPA=90/10, 1.0 ml/min,  $\lambda$  254 nm, t(major) = 8.16 min, t(minor) = 17.00 min] from a reaction catalyzed by DHQ-7f (10 mol%) at 10 °C for 48h.  $[\alpha]_D^{23} = +131.2$  (c = 0.43, CHCl<sub>3</sub>); <sup>1</sup>H NMR (400 MHz, CDCl<sub>3</sub>)  $\delta$  = 8.37 (s, 1H), 8.30 (d, *J* = 8.7 Hz, 2H), 7.98 (d, *J* = 8.7 Hz, 2H), 3.67 – 3.49 (m, 1H), 2.10 – 1.79 (m, 2H), 0.90 (t, *J* = 7.5 Hz, 3H); <sup>13</sup>C NMR (100 MHz, CDCl<sub>3</sub>)  $\delta$  = 163.0, 149.7, 140.6, 129.6, 125.4 (q, *J*<sub>C-F</sub> = 280.2 Hz), 124.1, 73.6 (q, *J*<sub>C-F</sub> = 27.6 Hz), 22.3, 10.2; <sup>19</sup>F NMR (376 MHz, CDCl<sub>3</sub>)  $\delta$  = -75.0 (d, *J* = 7.8 Hz); IR(CHCl<sub>3</sub>)  $\nu$  2978, 2880, 1651, 1603, 1526, 1348, 1273, 1174, 1124, 1046, 856, 823 cm<sup>-1</sup>; HRMS (ESI/[M+H]<sup>+</sup>) Calcd. for C<sub>11</sub>H<sub>12</sub>N<sub>2</sub>O<sub>2</sub>F<sub>3</sub> m/z 261.0851, found m/z 261.0856.

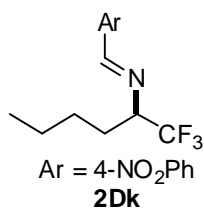

**Trifluoromethylated amine 2Dk.** The product was obtained as a yellow solid in 69% yield after flash chromatography (Hexanes/CH<sub>2</sub>Cl<sub>2</sub> = 20/1 to Hexanes/CH<sub>2</sub>Cl<sub>2</sub> = 2/1) and 92% ee as determined by HPLC analysis [Daicel Chiralcel OJ-H, Hexanes/IPA=95/5, 1.0 ml/min,  $\lambda$  254 nm, t(major) = 7.24 min, t(minor) = 6.82 min] from a reaction catalyzed by DHQ-7f (10 mol%) at 10 °C for 48h.  $[\alpha]_D^{23} = +155.8$  (c = 0.31, CHCl<sub>3</sub>); <sup>1</sup>H NMR (400 MHz, CDCl<sub>3</sub>)  $\delta$  = 8.34 (s, 1H), 8.31 – 8.22 (m, 2H), 8.01 – 7.87 (m, 2H), 3.69 – 3.56 (m, 1H), 1.99 – 1.75 (m, 2H), 1.41 – 1.06 (m, 4H), 0.87 (t, *J* = 7.3 Hz, 3H); <sup>13</sup>C NMR (100 MHz, CDCl<sub>3</sub>)  $\delta$  = 162.9, 149.6, 140.6, 129.6, 125.3 (d, *J*<sub>C-F</sub> = 280.3 Hz), 124.0, 72.2 (q, *J*<sub>C-F</sub> = 27.5 Hz), 28.5, 27.7, 22.3, 14.0; <sup>19</sup>F NMR (376 MHz, CDCl<sub>3</sub>)  $\delta$  = -75.1 (d, *J* = 6.8 Hz); IR(CHCl<sub>3</sub>)  $\nu$  2935, 2871, 1651, 1603, 1524, 1346, 1268, 1167, 1129, 1105, 855, 749 cm<sup>-1</sup>; HRMS (ESI/[M+H]<sup>+</sup>) Calcd. for C<sub>13</sub>H<sub>16</sub>N<sub>2</sub>O<sub>2</sub>F<sub>3</sub> m/z 289.1164, found m/z 289.1167.

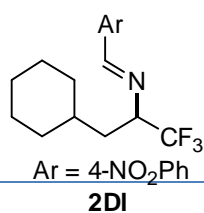

**Trifluoromethylated amine 2DI.** The product was obtained as a yellow liquid in 60% yield after flash chromatography (Hexanes/CH<sub>2</sub>Cl<sub>2</sub> = 20/1 to

Hexanes/CH<sub>2</sub>Cl<sub>2</sub> = 2/1) and 94% ee as determined by HPLC analysis [Daicel Chiralcel OJ-H, Hexanes/IPA=90/10, 1.0 ml/min, λ 254 nm, t(major) = 5.37 min, t(minor) = 15.52 min] from a reaction catalyzed by DHQ-7f (10 mol%) at 10 °C for 48h.  $[\alpha]_D^{23} = +156.9$  (c = 0.36, CHCl<sub>3</sub>); <sup>1</sup>H NMR (400 MHz, CDCl<sub>3</sub>) δ = 8.37 (s, 1H), 8.31 (d, *J* = 8.8 Hz, 2H), 7.98 (d, *J* = 8.8 Hz, 2H), 3.90 – 3.74 (m, 1H), 1.87 (ddd, *J* = 14.2, 10.3, 4.0 Hz, 1H), 1.79 – 1.60 (m, 6H), 1.26 – 1.09 (m, 4H), 1.09 – 0.80 (m, 2H); <sup>13</sup>C NMR (100 MHz, CDCl<sub>3</sub>) δ = 163.0, 149.7, 140.7, 129.6, 125.5 (q, *J*<sub>C-F</sub> = 286.1 Hz), 124.1, 69.4 (q, *J*<sub>C-F</sub> = 27.4 Hz), 36.2, 34.2, 33.1, 31.9, 26.5, 26.2, 26.0; <sup>19</sup>F NMR (376 MHz, CDCl<sub>3</sub>) δ = -75.1 (d, *J* = 7.7 Hz); IR(CHCl<sub>3</sub>) ν 2926, 2852, 1650, 1603, 1525, 1450, 1346, 1268, 1164, 1129, 1069, 855, 750 cm<sup>-1</sup>; HRMS (ESI/[M+H]<sup>+</sup>) Calcd. for C<sub>16</sub>H<sub>20</sub>N<sub>2</sub>O<sub>2</sub>F<sub>3</sub> m/z 329.1477, found m/z 329.1475.

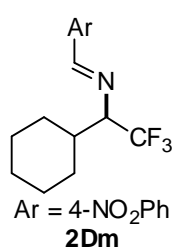

**Trifluoromethylated amine 2Dm.** The product was obtained as a yellow solid in 58% yield after flash chromatography (Hexanes/CH<sub>2</sub>Cl<sub>2</sub> = 20/1 to Hexanes/CH<sub>2</sub>Cl<sub>2</sub> = 3/2) and 91% ee as determined by HPLC analysis [Daicel Chiralcel AS-H, Hexanes/IPA=90/10, 1.0 ml/min, λ 254 nm, t(major) = 5.79 min, t(minor) = 25.58 min] from a reaction catalyzed by DHQ-7f (10 mol%) at 10 °C for 48h.  $[\alpha]_D^{23} = +147.5$  (c = 0.26, CHCl<sub>3</sub>); <sup>1</sup>H NMR (400 MHz, CDCl<sub>3</sub>) δ = 8.34 – 8.27 (m, 3H), 8.01 – 7.94 (m, 2H), 3.53 – 3.38 (m, 1H), 2.10 – 1.94 (m, 1H), 1.89 – 1.58 (m, 5H), 1.40 – 1.17 (m, 2H), 1.17 – 1.00 (m, 3H); <sup>13</sup>C NMR (100 MHz, CDCl<sub>3</sub>) δ = 162.8, 149.6, 140.6, 129.6, 125.4 (q, *J*<sub>C-F</sub> = 281.7 Hz), 124.0, 77.0 (q, *J*<sub>C-F</sub> = 26.1 Hz), 38.3, 30.3, 28.5, 26.2, 26.0; <sup>19</sup>F NMR (376 MHz, CDCl<sub>3</sub>) δ = -70.6 (d, *J* = 8.1 Hz); IR(CHCl<sub>3</sub>) ν 2933, 2858, 1651, 1603, 1526, 1347, 1269, 1162, 1122, 851, 773 cm<sup>-1</sup>; HRMS (ESI/[M+H]<sup>+</sup>) Calcd. for C<sub>15</sub>H<sub>18</sub>N<sub>2</sub>O<sub>2</sub>F<sub>3</sub> m/z 315.1320, found m/z 315.1311.

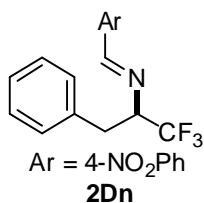

**Trifluoromethylated amine 2Dn.** The product was obtained as a yellow liquid in 65% yield after flash chromatography (Hexanes/CH<sub>2</sub>Cl<sub>2</sub> = 20/1 to Hexanes/CH<sub>2</sub>Cl<sub>2</sub> = 2/1) and 87% ee as determined by HPLC analysis [Daicel Chiralcel OJ-H, Hexanes/IPA=90/10, 1.0 ml/min, λ 254 nm, t(major) = 11.56 min, t(minor) = 10.80 min] from a reaction catalyzed by DHQ-7f (10 mol%) at 5 °C for 48h.  $[\alpha]_D^{23} = +286.7$  (c = 0.36, CHCl<sub>3</sub>); <sup>1</sup>H NMR (400 MHz, CDCl<sub>3</sub>) δ = 8.24 (d, *J* = 8.6 Hz, 2H), 7.79 (d, *J* = 8.7 Hz, 2H), 7.66 (s, 1H), 7.25 – 7.17 (m, 3H), 7.07 (d, *J* = 7.5 Hz, 2H), 3.91 – 3.77 (m, 1H), 3.31 (dd, *J* = 13.5, 2.3 Hz, 1H), 3.05 (dd, *J* = 13.5, 10.8 Hz, 1H); <sup>13</sup>C NMR (100 MHz, CDCl<sub>3</sub>) δ = 163.2, 149.6, 140.4, 135.8, 130.0, 129.3, 128.7, 127.2, 125.1 (q, *J*<sub>C-F</sub> = 280.4 Hz), 124.0, 73.4 (q, *J*<sub>C-F</sub> = 27.7 Hz), 35.6; <sup>19</sup>F NMR (376 MHz, CDCl<sub>3</sub>) δ = -75.7 (d, *J* = 7.0 Hz); IR(CHCl<sub>3</sub>) ν 2887, 1650, 1603, 1524, 1347, 1270, 1166, 1129, 1082, 854, 828, 749 cm<sup>-1</sup>; HRMS (ESI/[M+H]<sup>+</sup>) Calcd. for C<sub>16</sub>H<sub>14</sub>N<sub>2</sub>O<sub>2</sub>F<sub>3</sub> m/z 323.1007, found m/z 323.1007.



#### 4. Hydrolysis of chiral amines 2D

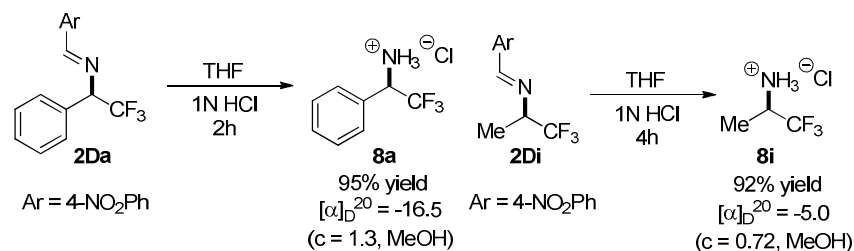

A modified procedure from a literature report<sup>11</sup> was used here:

At 0 °C, to the solution of amine **2D** (0.14 mmol) in THF (0.7 mL) was added HCl (1N, 0.7 mL). The mixture was stirred at room temperature until all the *N*-benzyl trifluoromethylated amine was consumed (indicated by TLC analysis). The THF was evaporated under vacuum. Another 0.7 mL HCl (1N) was added. The aqueous layer was then washed with Et<sub>2</sub>O (2.0 mL×3) and concentrated under vacuum to afford the trifluoromethyl amine hydrochloride salt **8** as indicated by <sup>1</sup>H NMR.

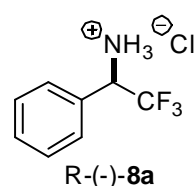

The product was obtained as a white solid in 95% yield. [α]<sub>D</sub><sup>23</sup> = -16.5 (c = 1.3, MeOH); <sup>1</sup>H NMR (400 MHz, CD<sub>3</sub>OD) δ 7.56 (s, 5H), 5.35 (q, *J* = 7.2 Hz, 1H). <sup>19</sup>F NMR (376 MHz, CD<sub>3</sub>OD) δ = -75.5. The spectral data was consistent with that reported in the literature<sup>12</sup>. The ee value was determined to be 90% by HPLC analysis of the corresponding *N*-benzoyl derivative (the NMR and HPLC spectrums were attached).

**The absolute configuration of (-)-8a was determined to be R by comparing the specific optical rotation with a literature value.** [α]<sub>D</sub><sup>23</sup> = -16.5 (c = 1.3, MeOH) for 90% ee [lit.<sup>12</sup> [α]<sub>D</sub><sup>25</sup> = +28.6 (c = 0.65, MeOH) for 94% ee].

R-(-)-**8i**

The product was obtained as a white solid in 92% yield. [α]<sub>D</sub><sup>23</sup> = -5.0 (c = 0.72, MeOH); <sup>1</sup>H NMR (400 MHz, CD<sub>3</sub>OD) δ 4.27 – 4.15 (m, 1H), 1.49 (d, *J* = 6.9 Hz, 3H). <sup>19</sup>F NMR (376 MHz, CD<sub>3</sub>OD) δ -78.5 (d, *J* = 6.5 Hz). The spectral data was consistent with that reported in the literature<sup>11</sup>. The ee value was determined to be 90% by HPLC analysis of the corresponding *N*-benzoyl derivative (the NMR and HPLC spectrums were attached).

**The absolute configuration of (-)-8i was determined to be R by comparing the specific optical rotation with a literature value.** [α]<sub>D</sub><sup>23</sup> = -5.0 (c = 0.72, MeOH) for 90% ee [lit.<sup>11</sup> [α]<sub>D</sub><sup>25</sup> = -2.94 (c = 1.0, MeOH) for 98% ee].

## 5. Reference

- (1) Wu, Y.; Singh, R. P.; Deng, L. *J. Am. Chem. Soc.* **2011**, *133*, 12458.
- (2) Song, J.; Shih, H.-W.; Deng, L. *Org. Lett.* **2007**, *9*, 603.
- (3) Wu, F.; Hong, R.; Khan, J.; Liu, X.; Deng, L. *Angew. Chem.* **2006**, *45*, 4301.
- (4) Marcelli, T.; van der Haas, R. N. S.; van Maarseveen, J. H.; Hiemstra, H. *Angew. Chem., Int. Ed.* **2006**, *45*, 929.
- (5) Corey, E. J.; Zhang, J. *Org. Lett.* **2001**, *3*, 3211.
- (6) Palacio, C.; Connon, S. J. *Org. Lett.* **2011**, *13*, 1298.
- (7) Yardley, J. P.; Bright, R. E.; Rane, L.; Rees, R. W.; Russell, P. B.; Smith, H. *J. Med. Chem.* **1971**, *14*, 62.
- (8) Creary, X. *J. Org. Chem.* **1987**, *52*, 5026.
- (9) Berbasov, D. O.; Ojemaye, I. D.; Soloshonok, V. A. *J. Fluorine Chem.* **2004**, *125*, 603.
- (10) Previously, Self-disproportionation of trifluoromethylated amines on silica column was reported, see: Soloshonok, V. A. *Angew. Chem., Int. Ed.* **2006**, *45*, 766. The ee value of product in this manuscript stayed the same after the separation.
- (11) Soloshonok, V. A.; Ono, T. *J. Org. Chem.* **1997**, *62*, 3030.
- (12) Prakash, G. K. S.; Mandal, M.; Olah, G. A. *Angew. Chem., Int. Ed.* **2001**, *40*, 589.

wuyw-IV-4  
wuyw-IV-4 <sup>1</sup>H and <sup>13</sup>C NMR spectra for the cinchona alkaloids

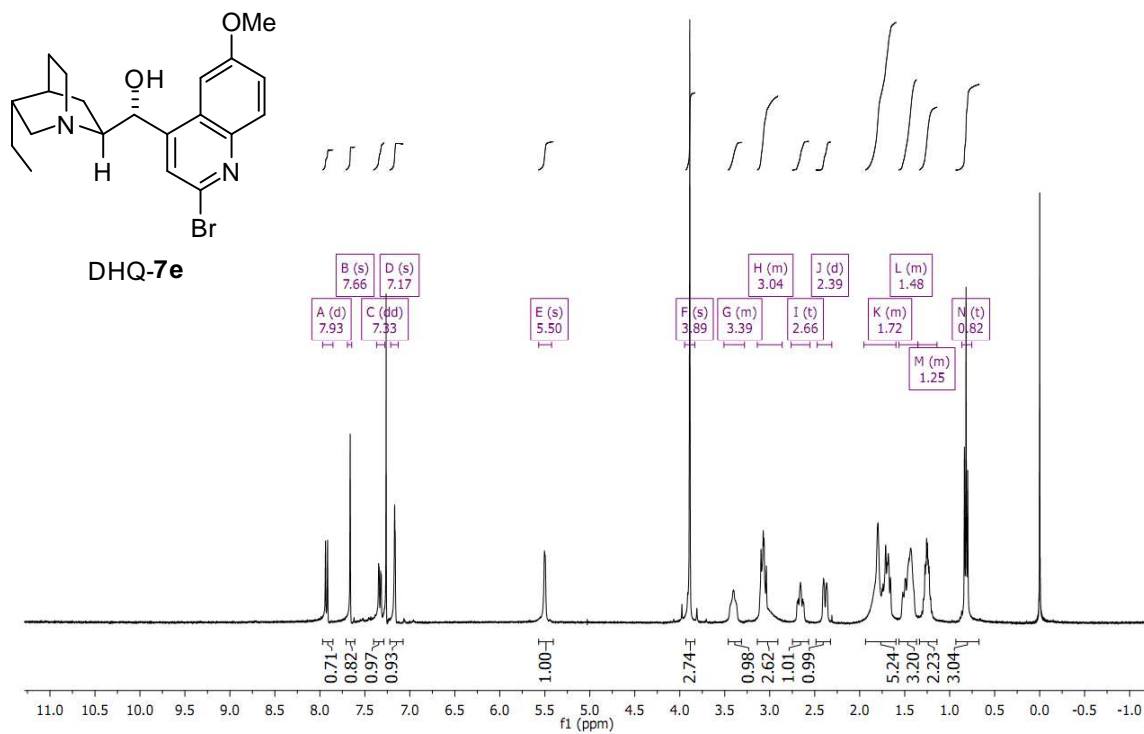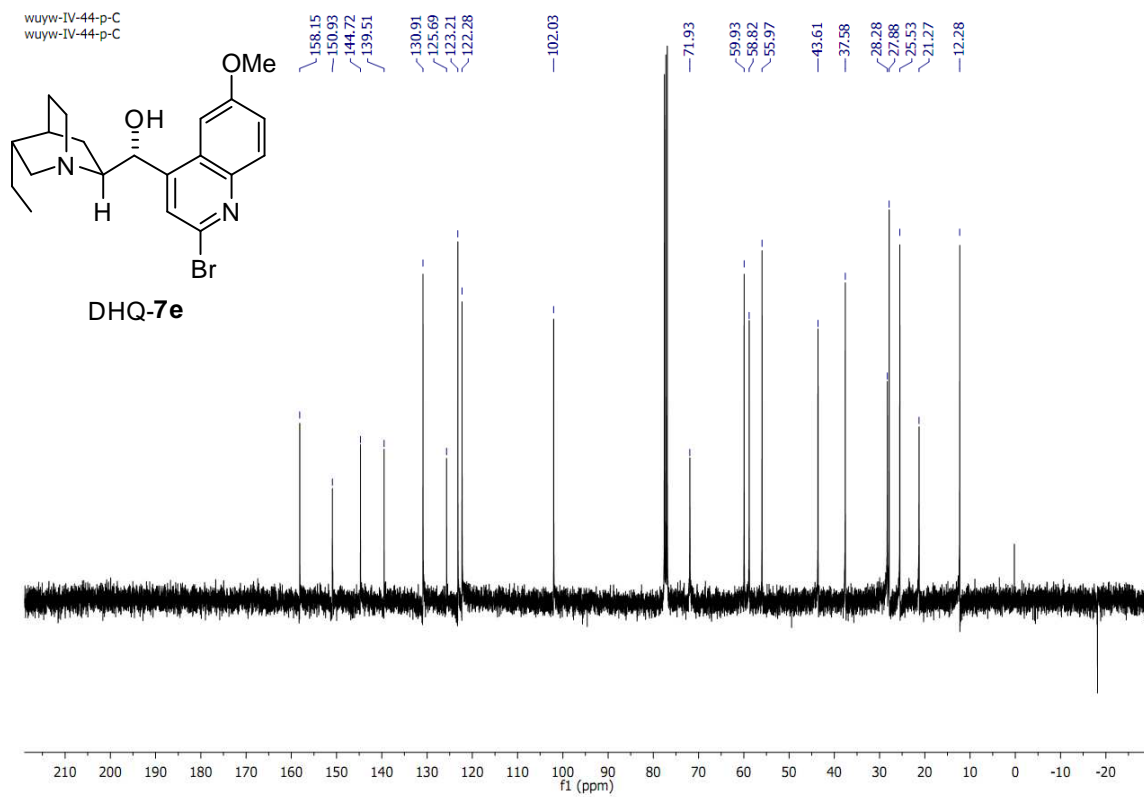

wuyw-IV-46-2-CIDHQ  
wuyw-IV-46-2-CIDHQ

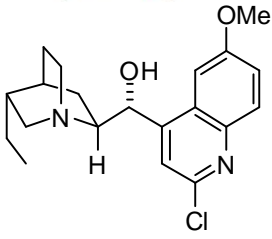

DHQ-7f

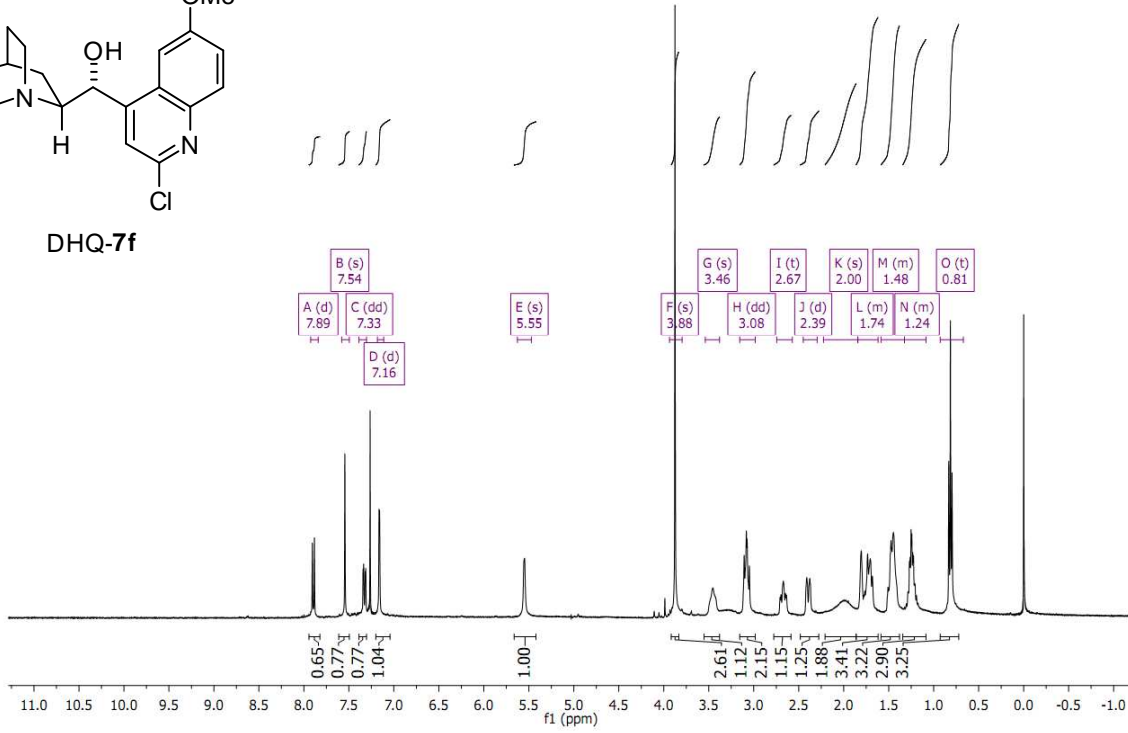

wuyw-IV-45-p-C  
wuyw-IV-45-C

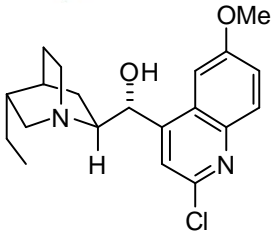

DHQ-7f

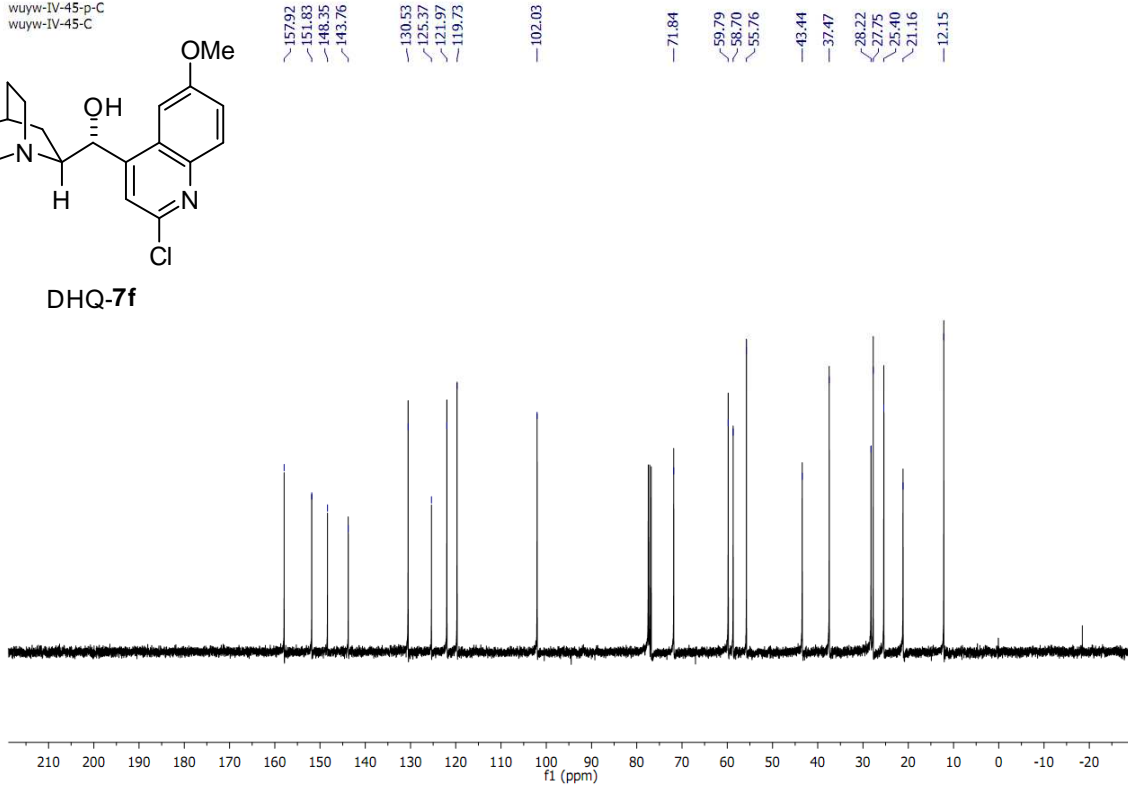

wuyw-IV-50-1  
wuyw-IV-50

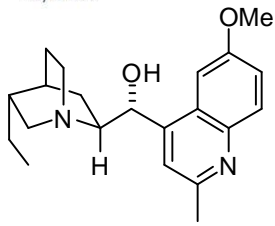

DHQ-7g

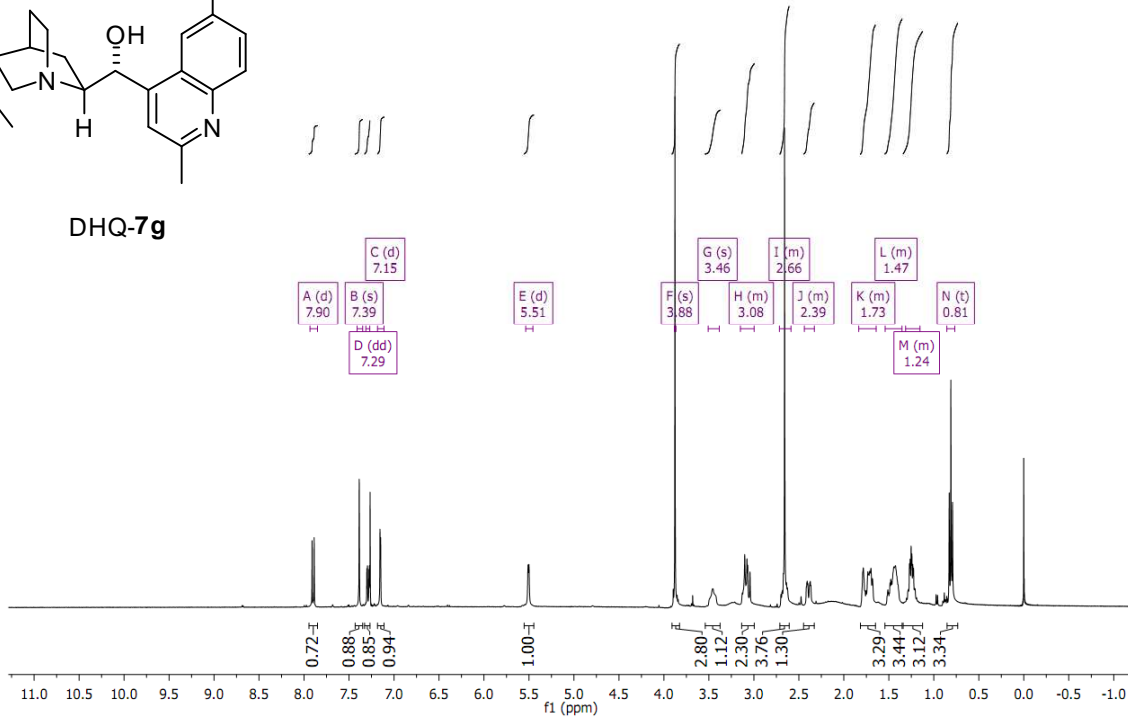

wuyw-IV-50-C  
wuyw-IV-50-C

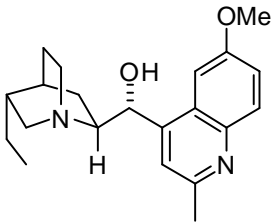

DHQ-7g

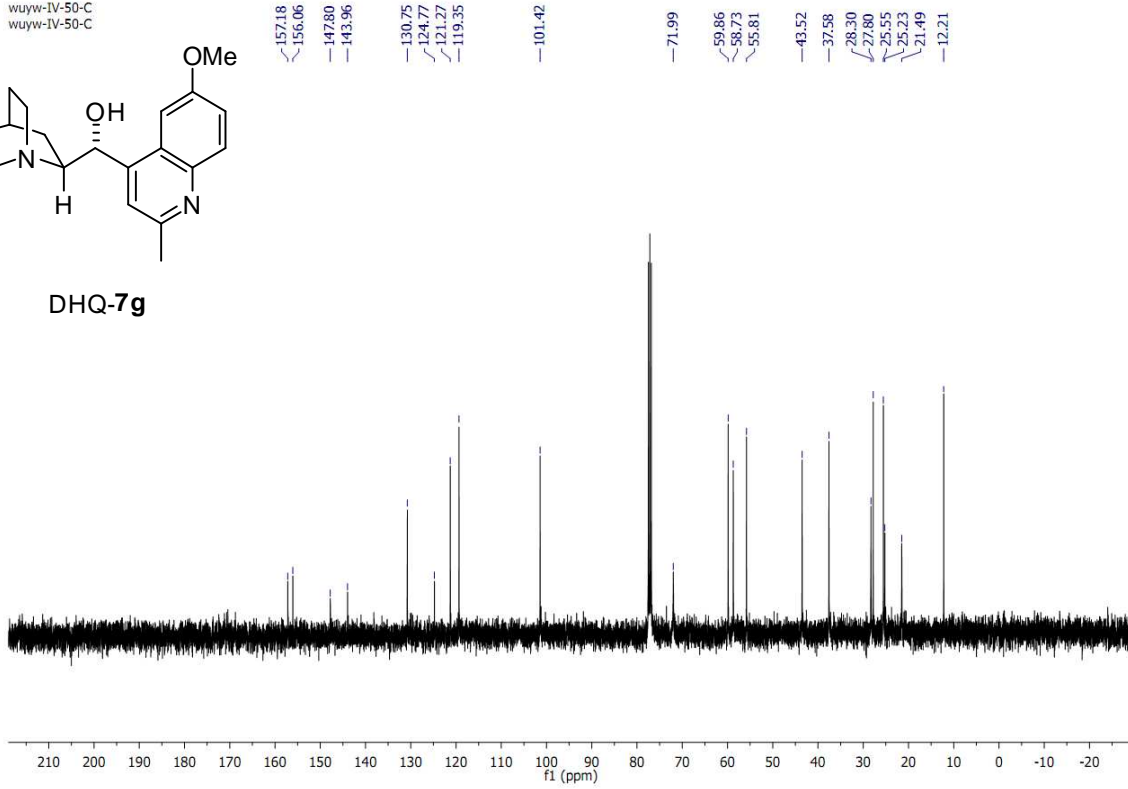

# $^1\text{H}$ , $^{13}\text{C}$ and $^{19}\text{F}$ NMR spectra for imine **1**

wuyw-III-152-p-H  
wuyw-III-152-p-H

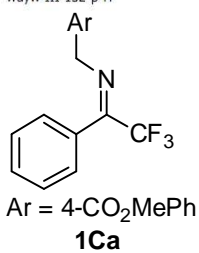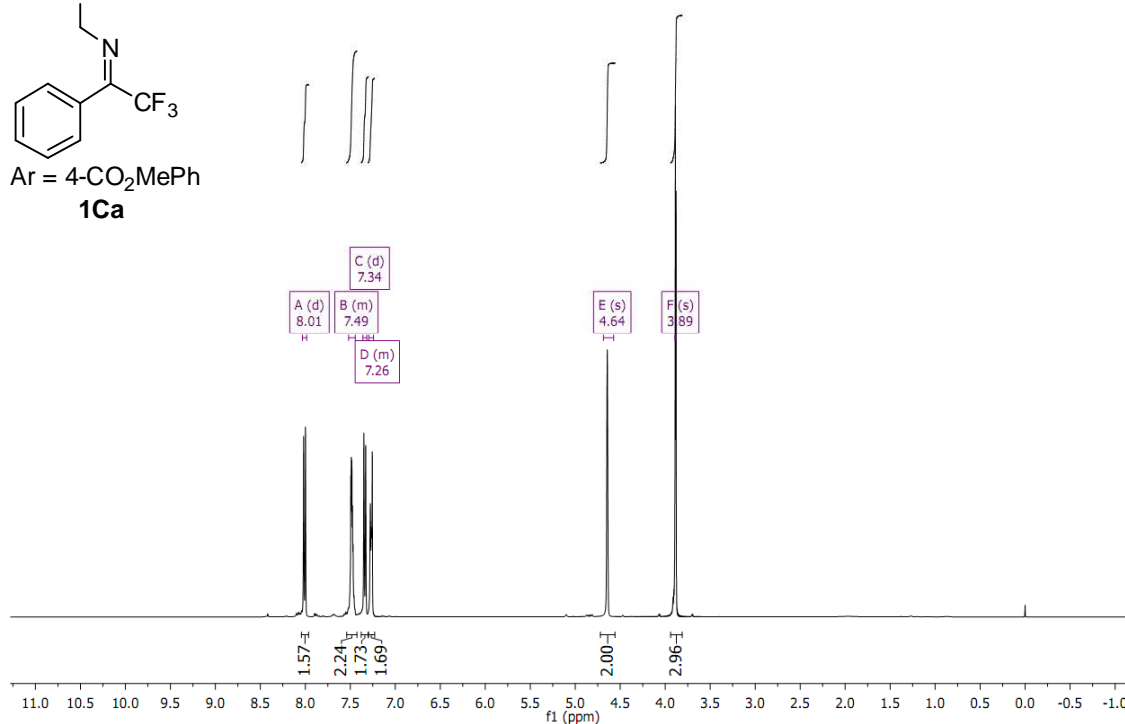

wuyw-III-152-p-C  
wuyw-III-152-p-C

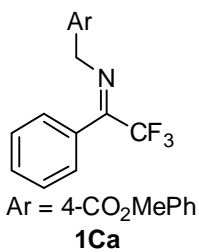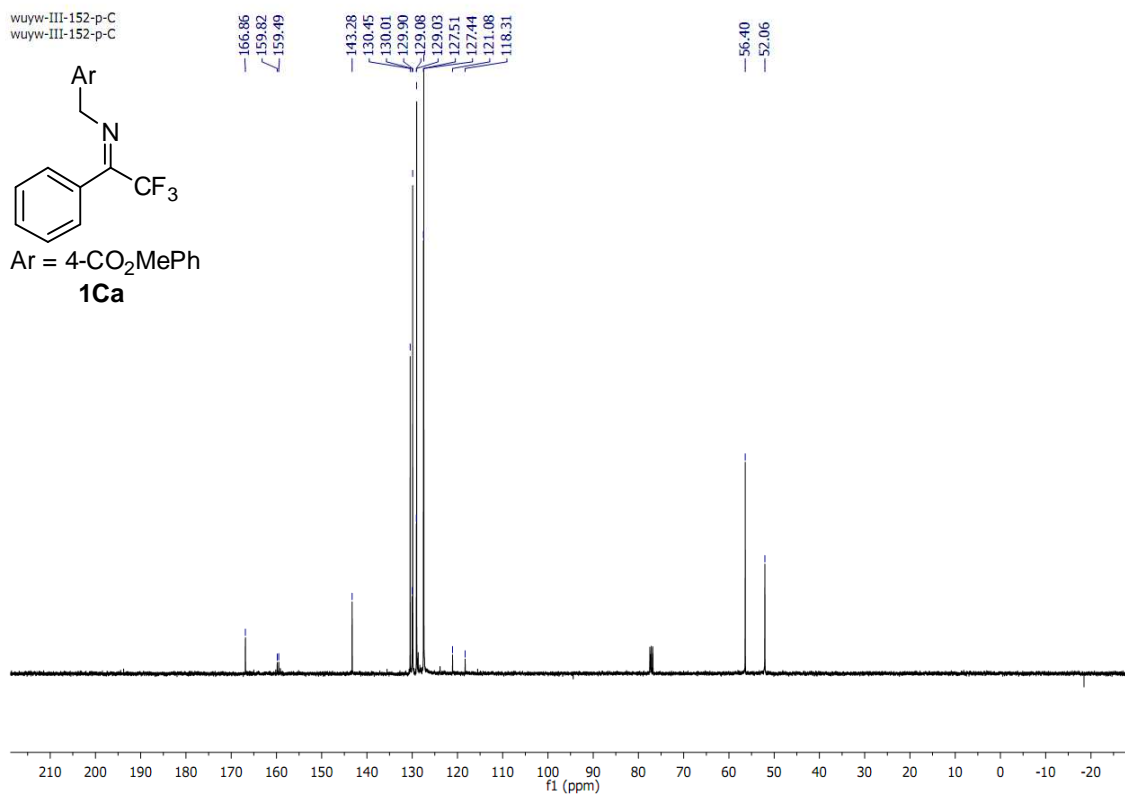

wuyw-III-152-p-F  
F19 OBSERVE  
STANDARD PARAMETERS

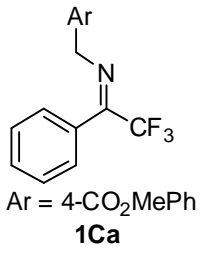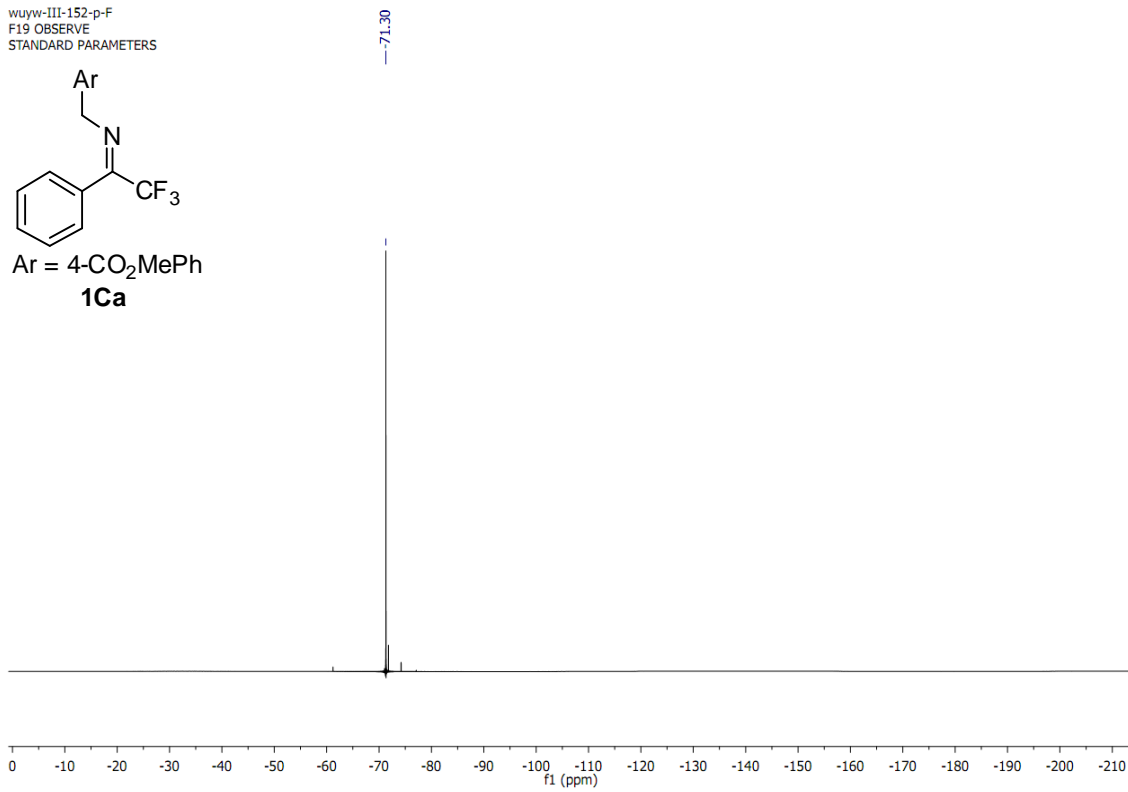

wuyw-IV-82-p-H  
wuyw-IV-82-p-H

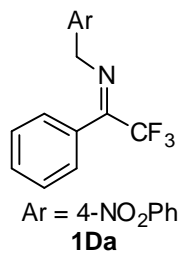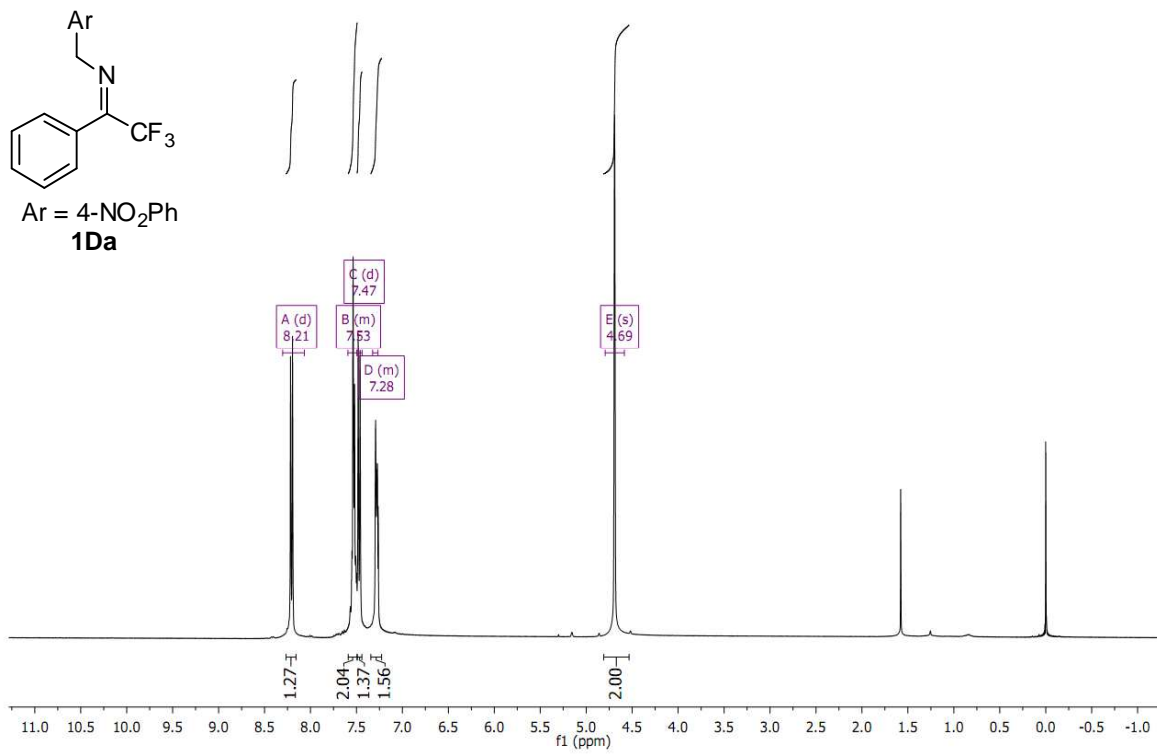

wuyw-IV-82-p-2-C  
wuyw-IV-82-p-C

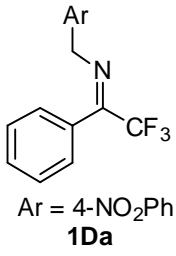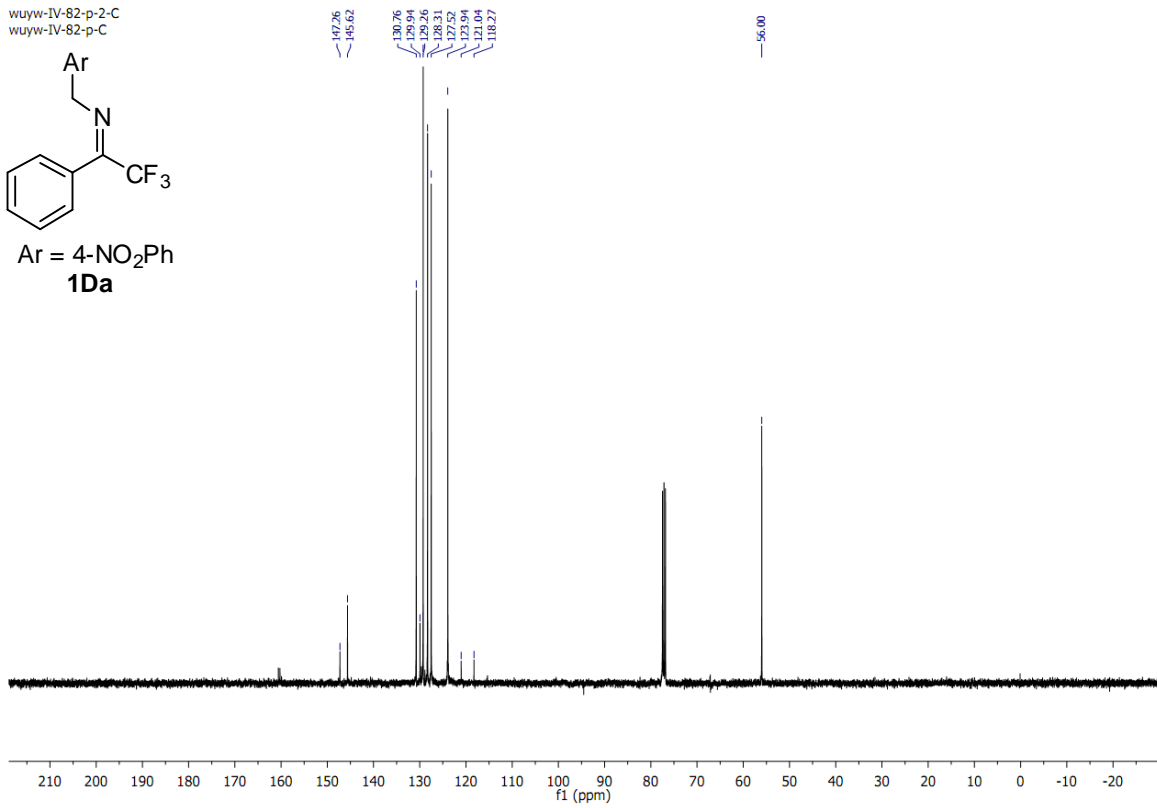

wuyw-IV-82-p-F  
F19 OBSERVE  
STANDARD PARAMETERS

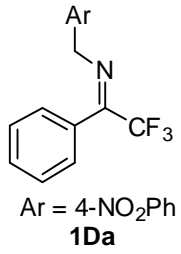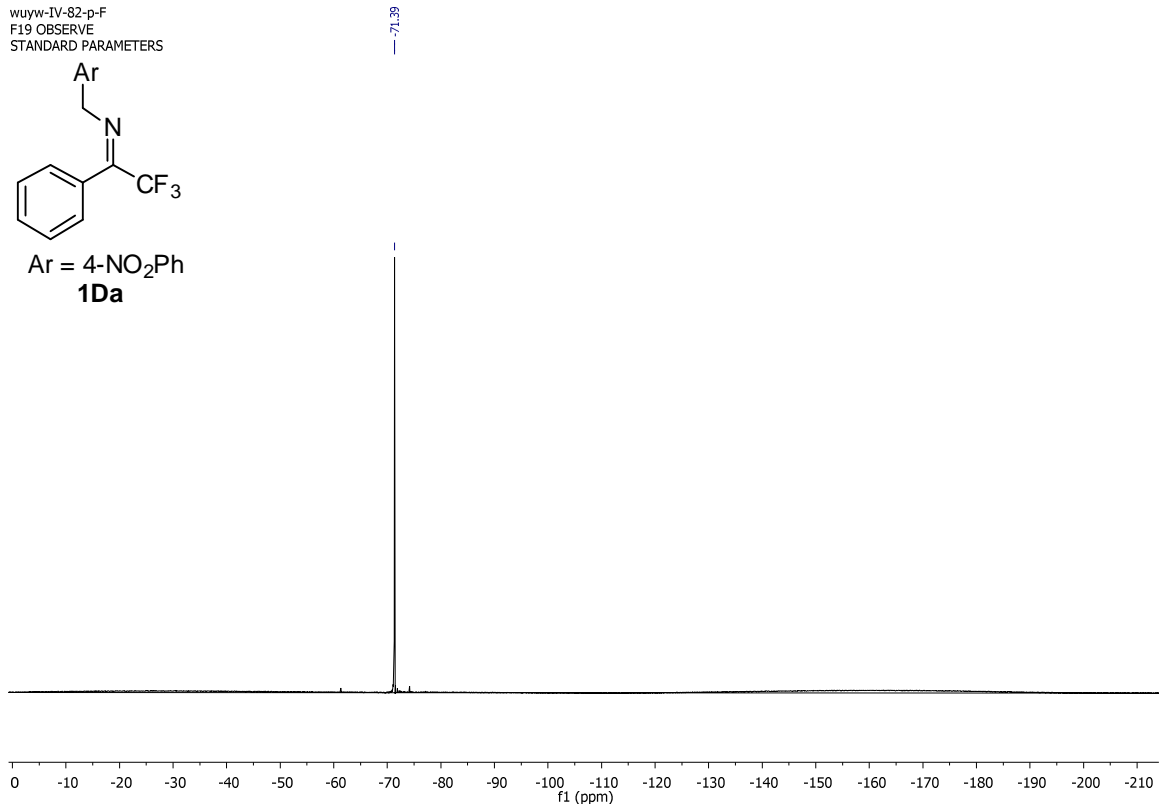



wuyw-IV-55-p  
wuyw-IV-55

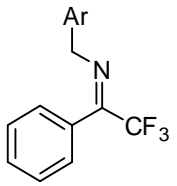

Ar = 2-NO<sub>2</sub>Ph  
**1Ea**

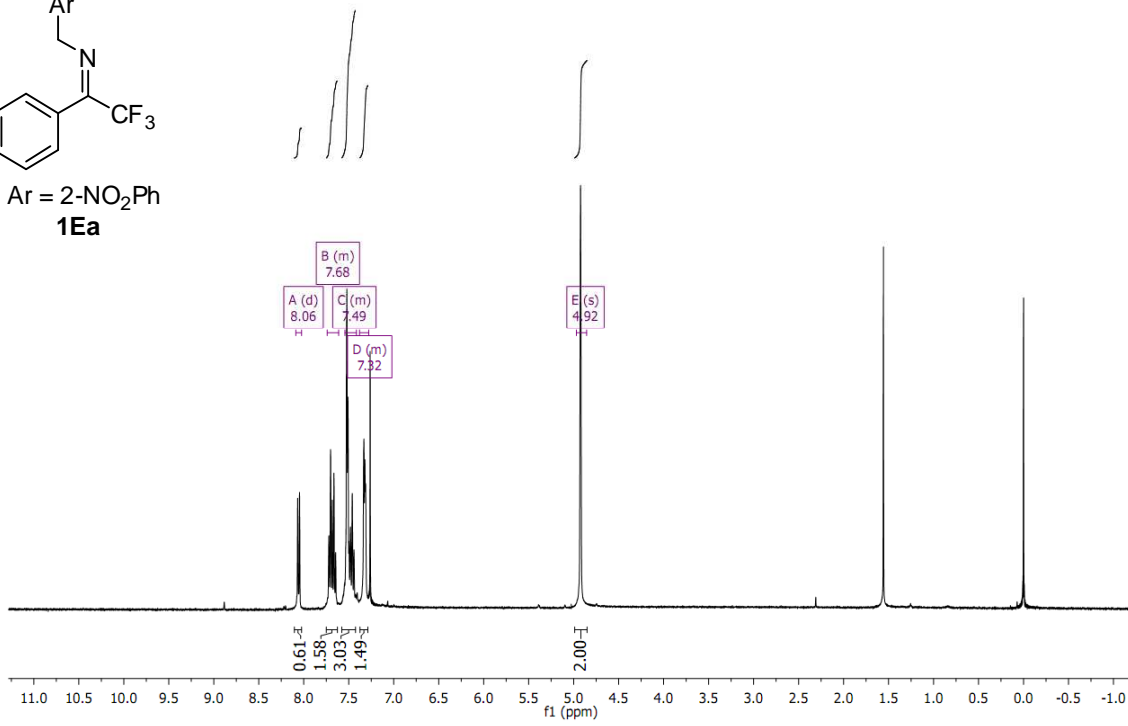

wuyw-IV-55-p-C  
wuyw-IV-55-p-C

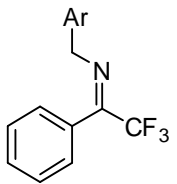

Ar = 2-NO<sub>2</sub>Ph  
**1Ea**

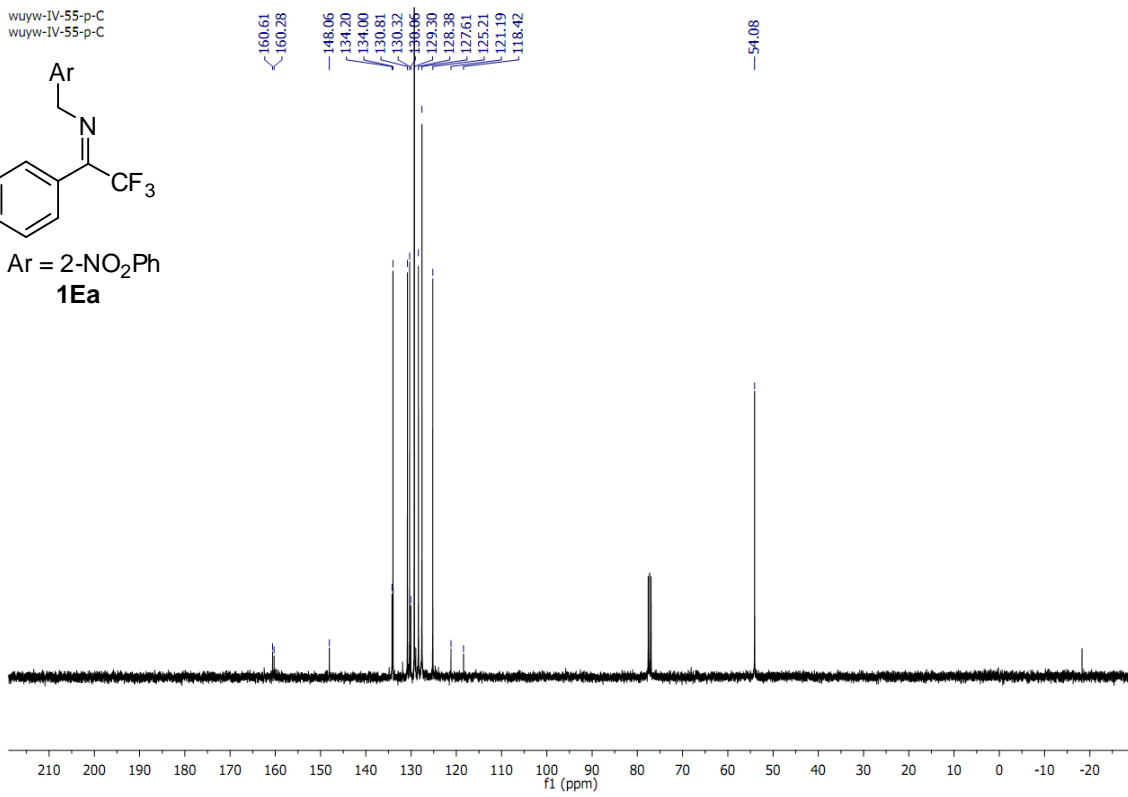

wuyw-IV-55-p-F  
F19 OBSERVE  
STANDARD PARAMETERS

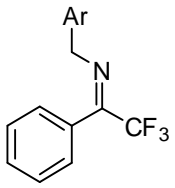

Ar = 2-NO<sub>2</sub>Ph  
**1Ea**

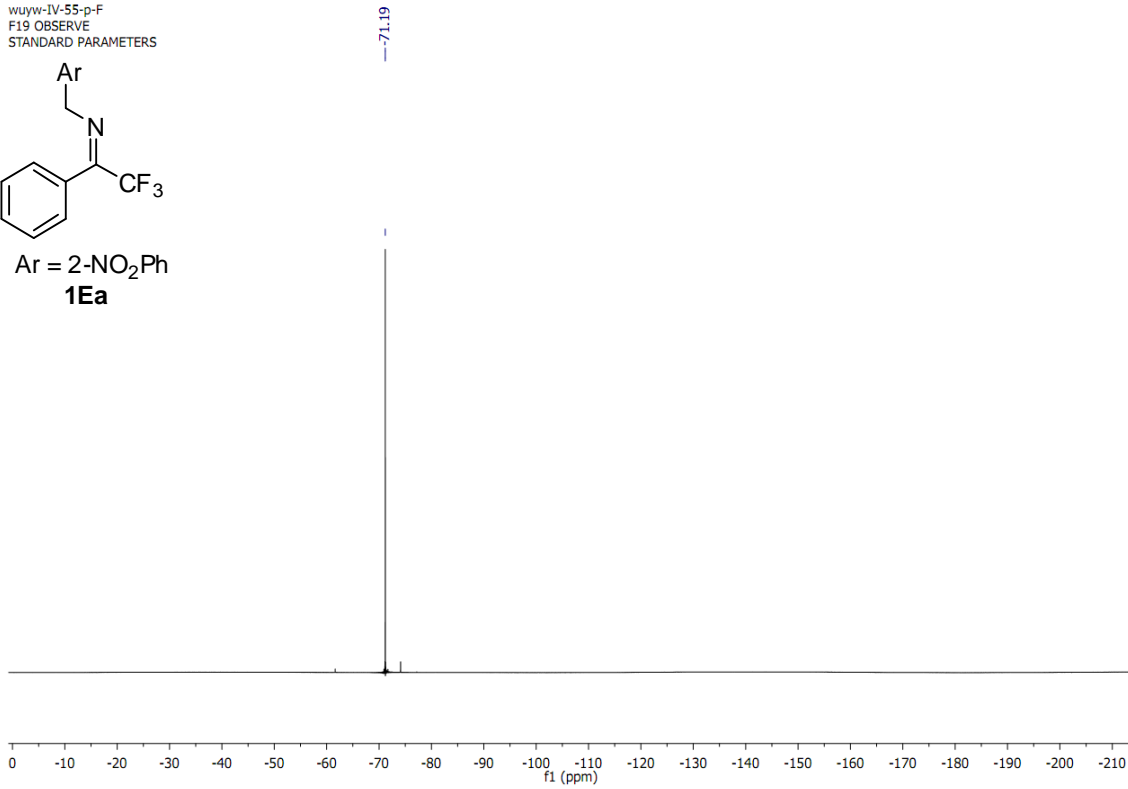

wuyw-IV-112-p-1-H  
wuyw-IV-112-p-H

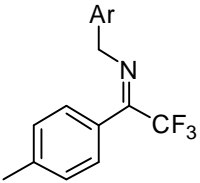

Ar = 4-NO<sub>2</sub>Ph  
**1Db**

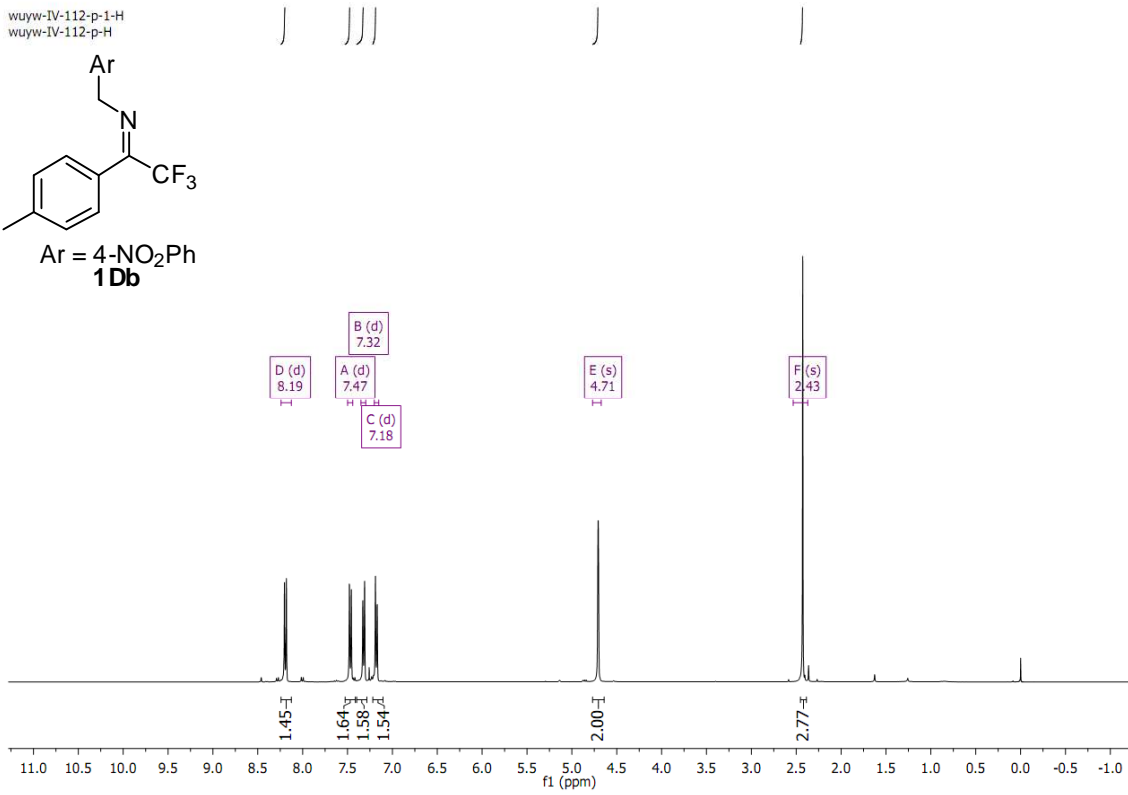

wuyw-IV-112-p-1-C  
13C OBSERVE

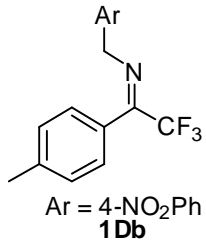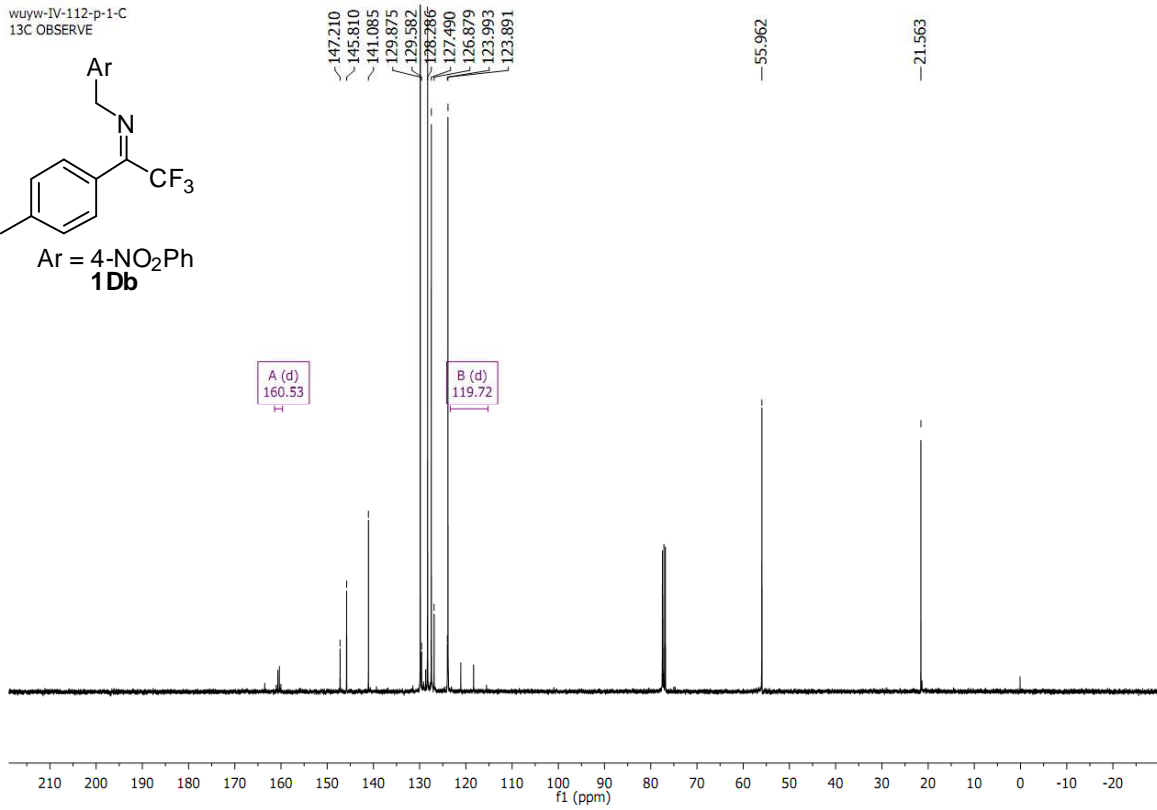

wuyw-IV-112-p-1-F  
F19 OBSERVE  
STANDARD PARAMETERS

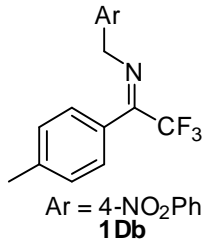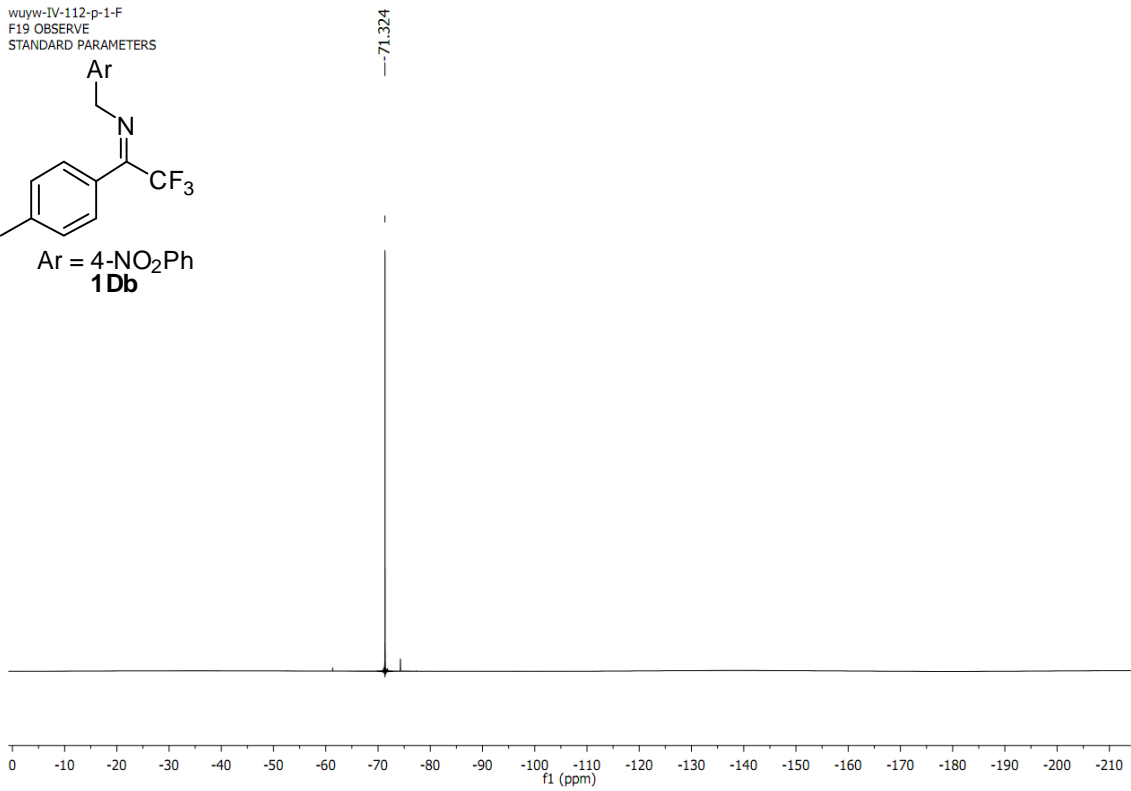

wuyw-IV-128-h  
wuyw-IV-128-h

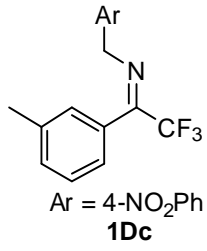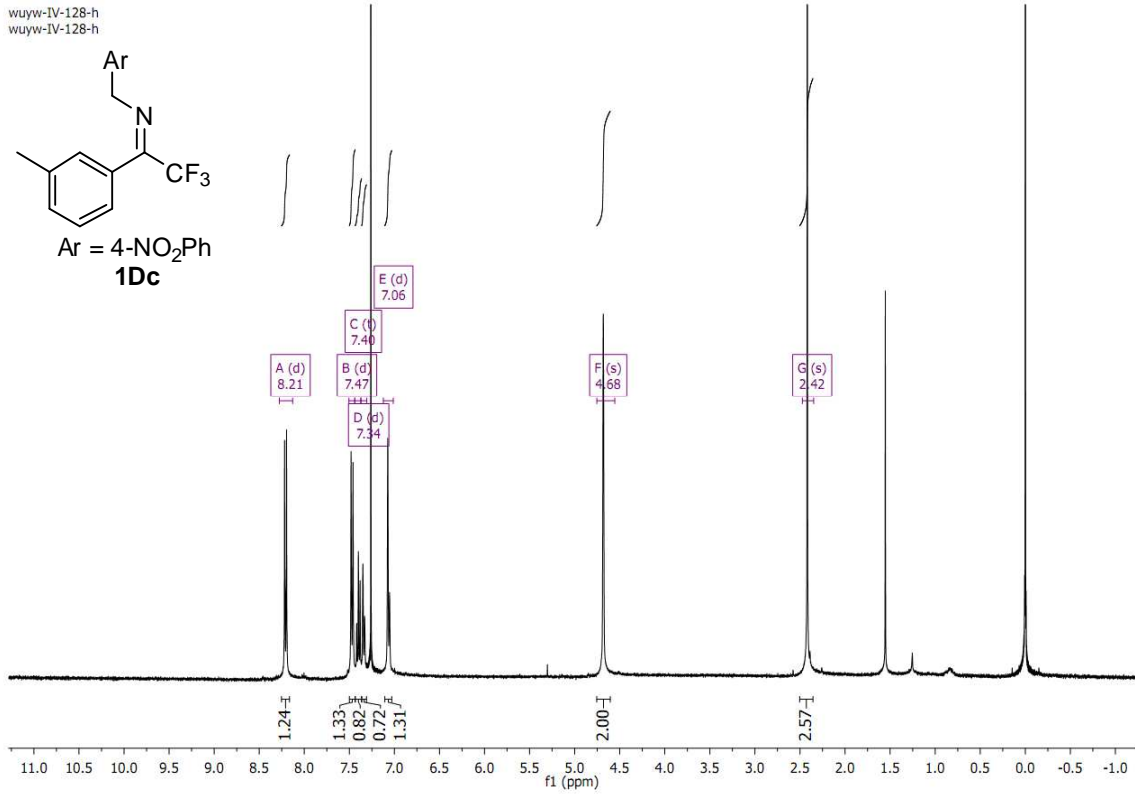

wuyw-IV-128-p-C  
wuyw-IV-128-p-C

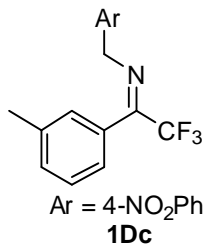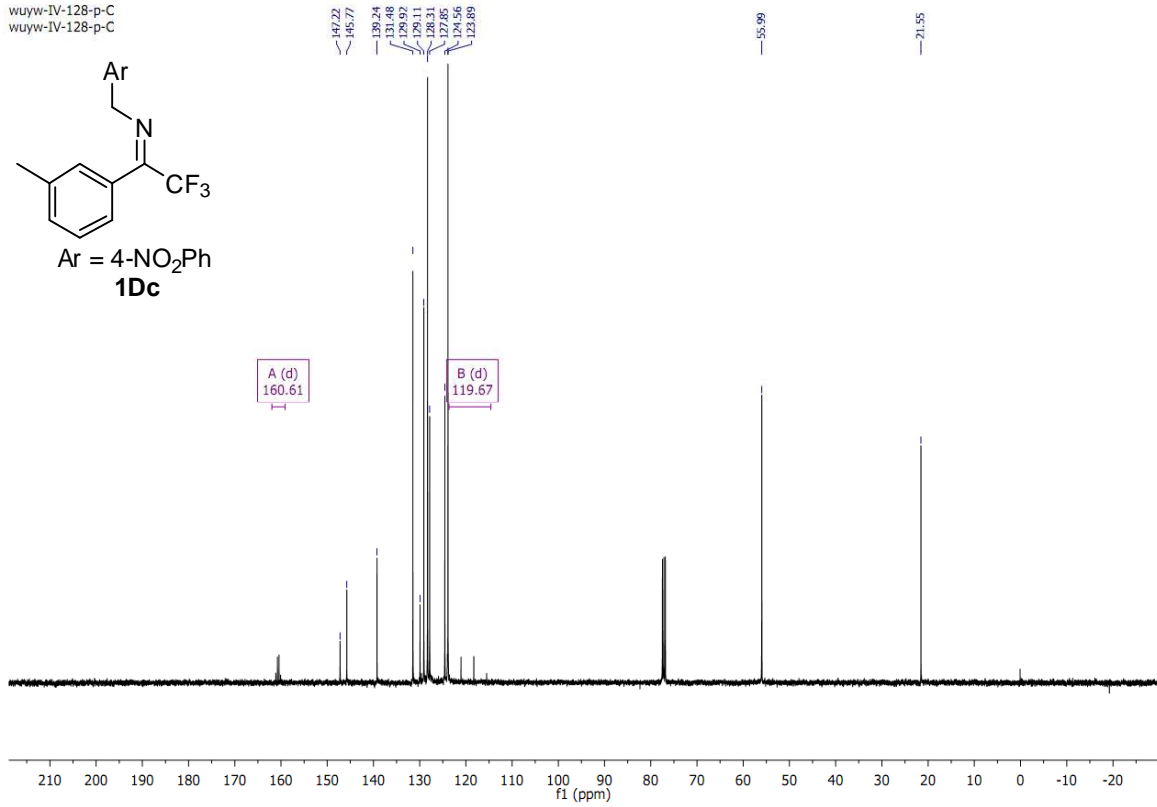

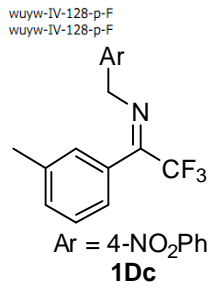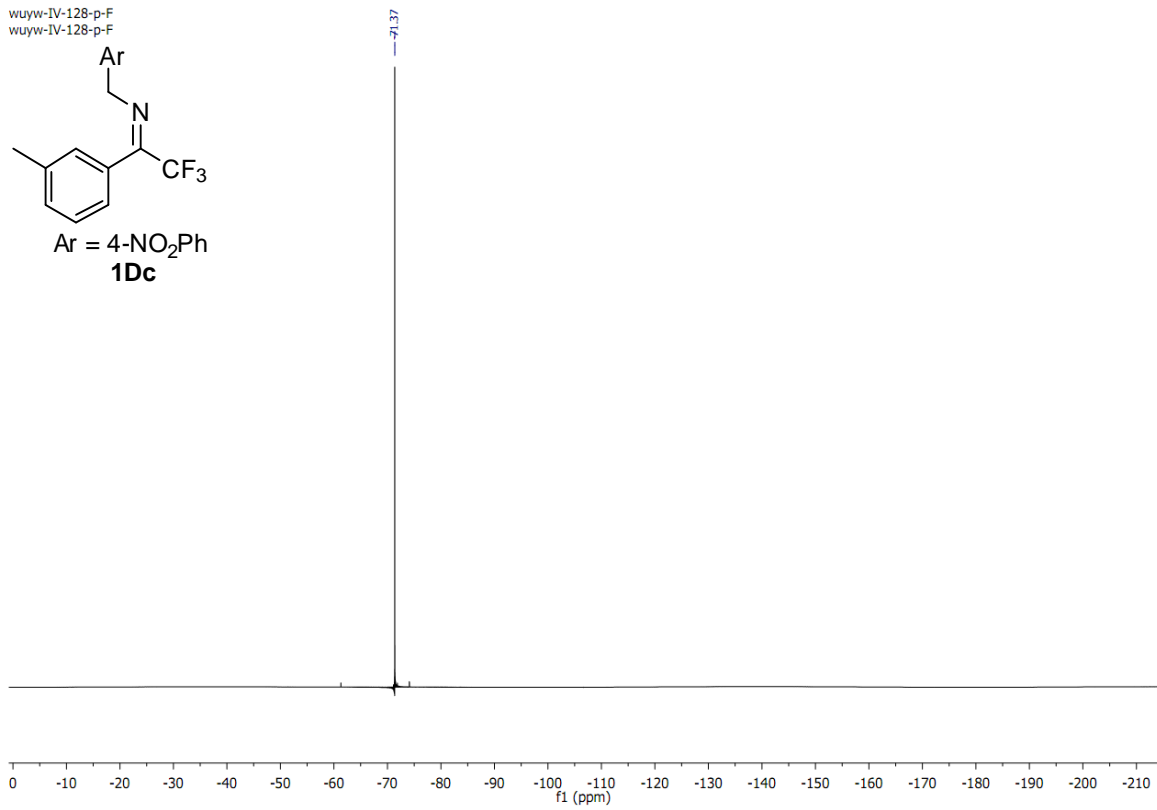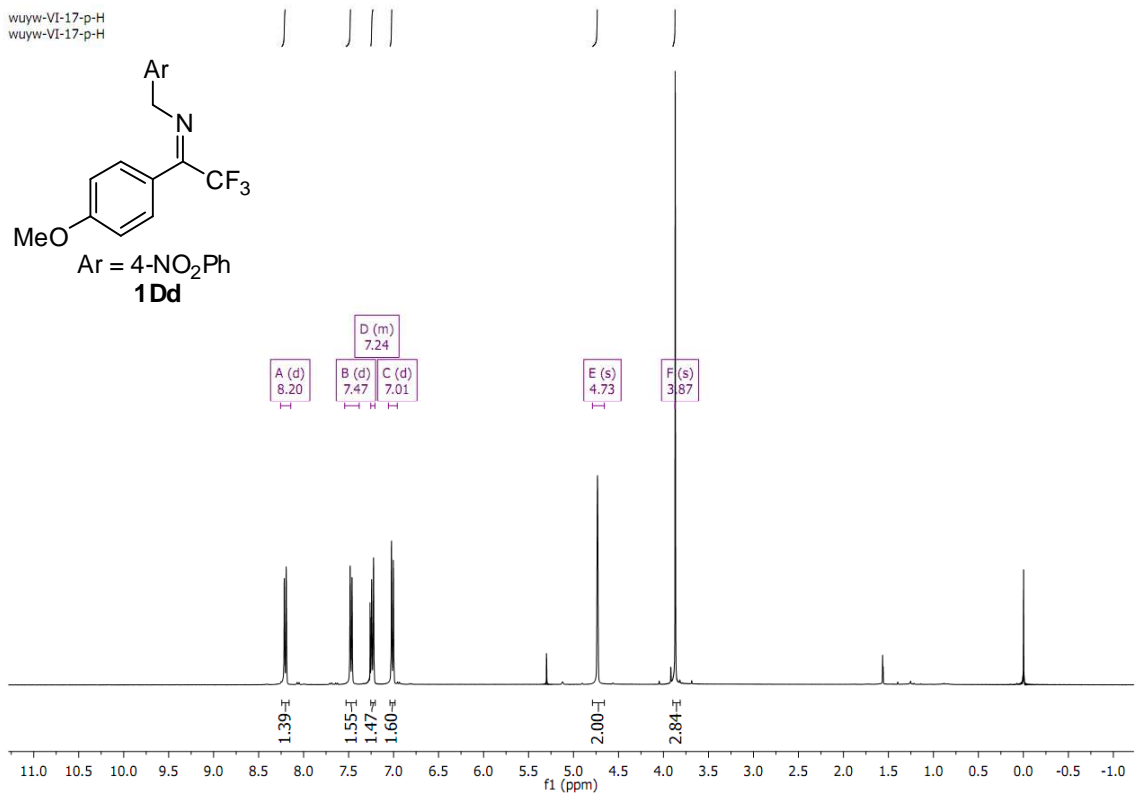

wuyw-VI-17-p-C  
wuyw-VI-17-p-C

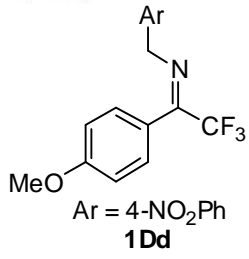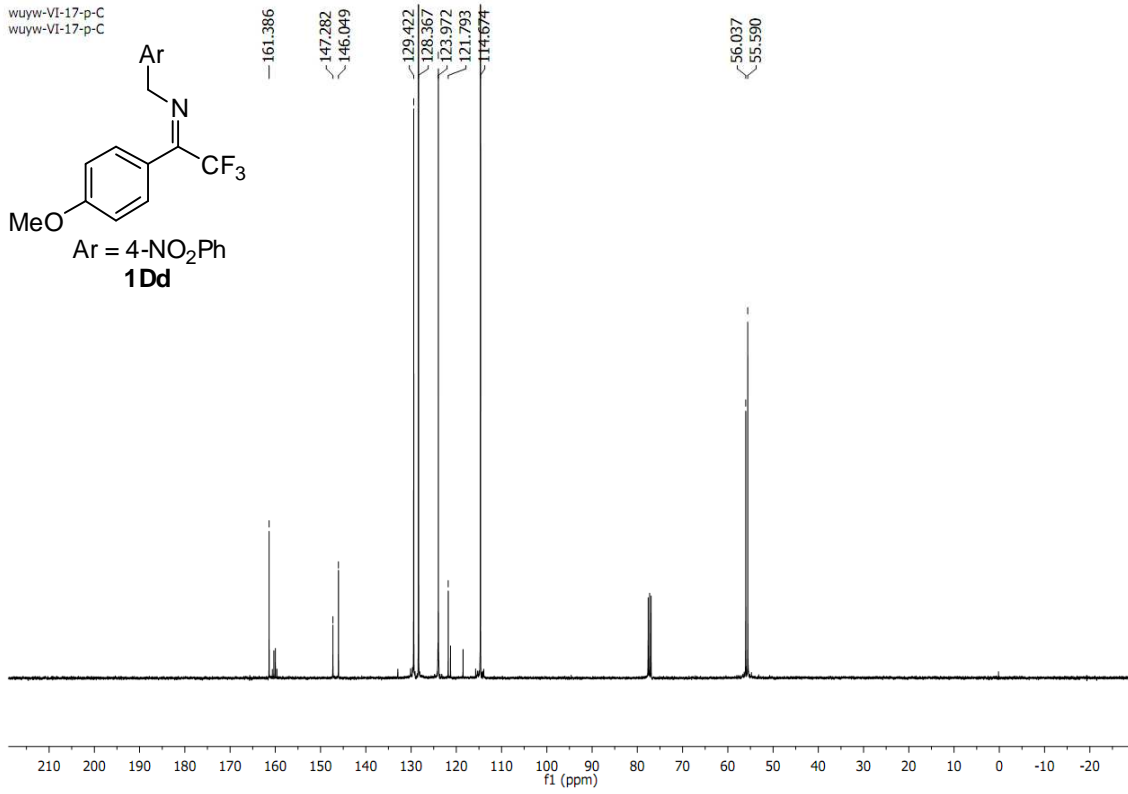

wuyw-VI-17-p-F  
wuyw-VI-17-p-F

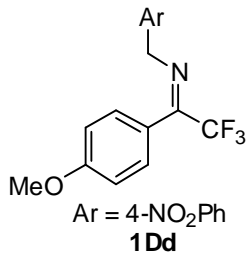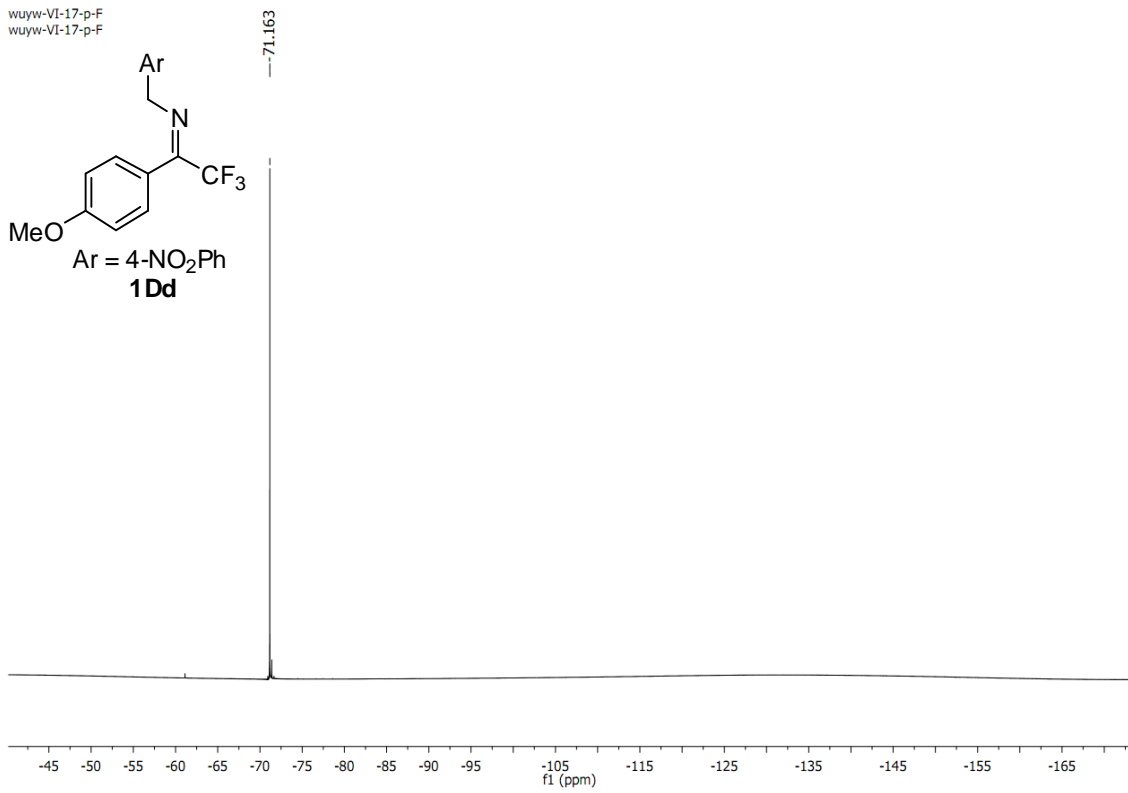

wuyw-IV-86-s3  
wuyw-IV-86-s2

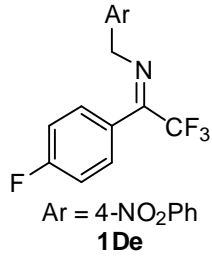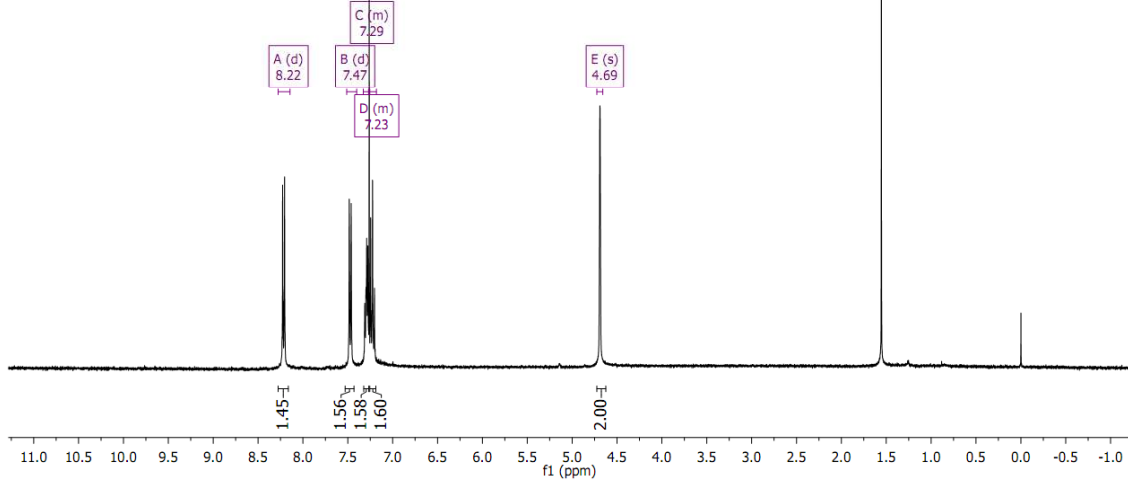

wuyw-IV-86-P-C  
wuyw-IV-86-p-C

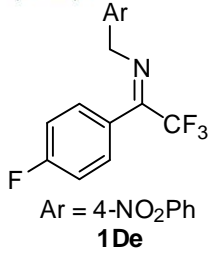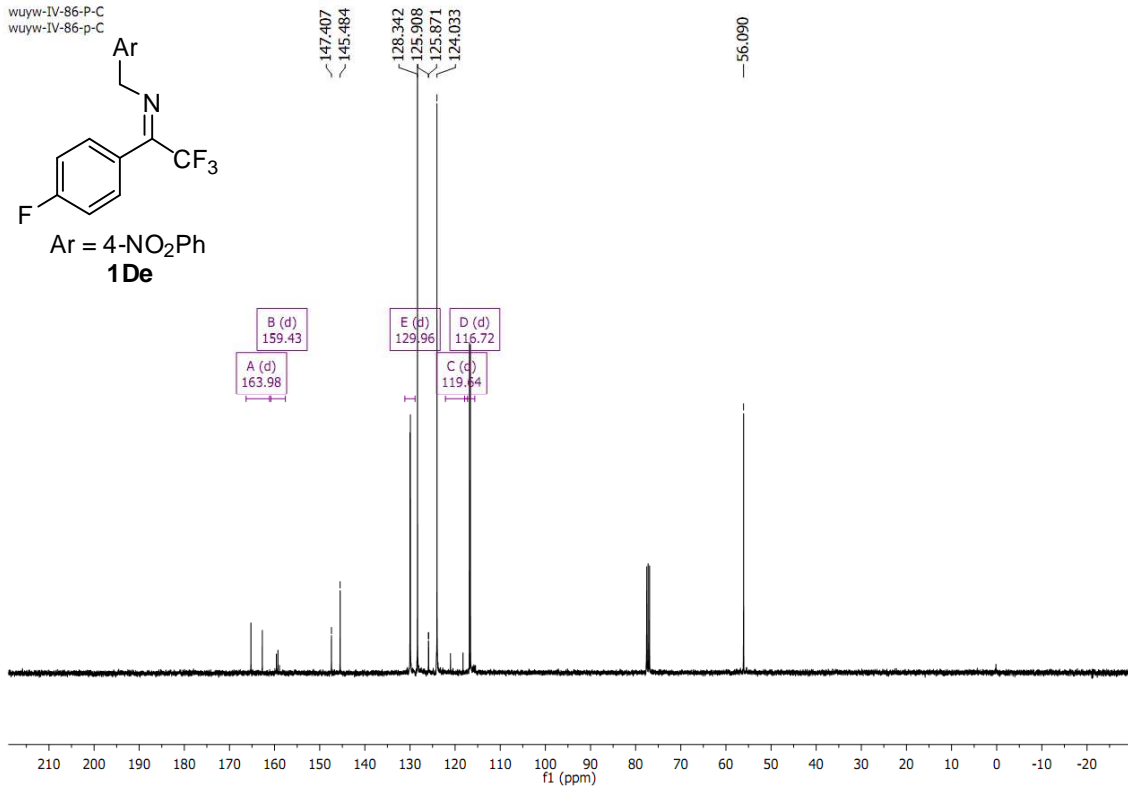

wuyw-IV-86-p-F  
F19 OBSERVE  
STANDARD PARAMETERS

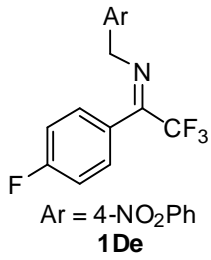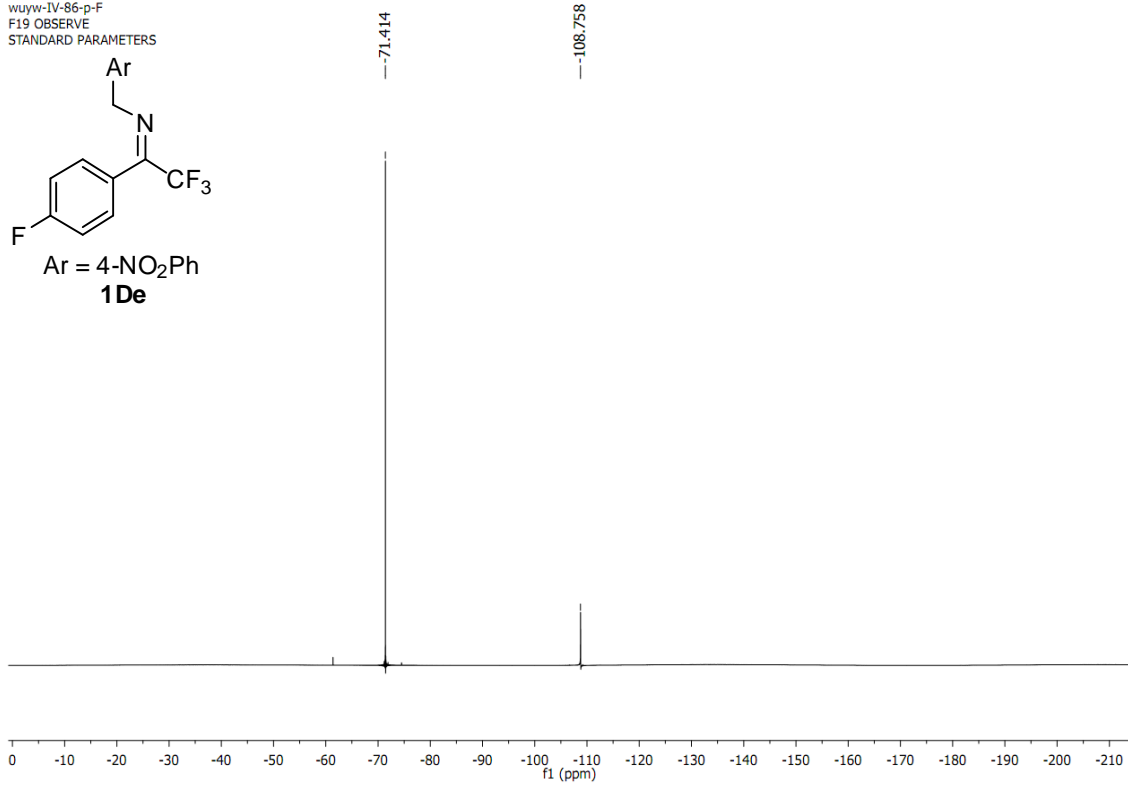

wuyw-IV-95-p-H  
STANDARD 1H OBSERVE

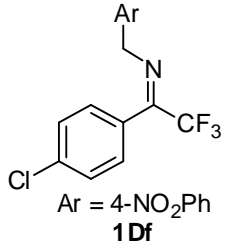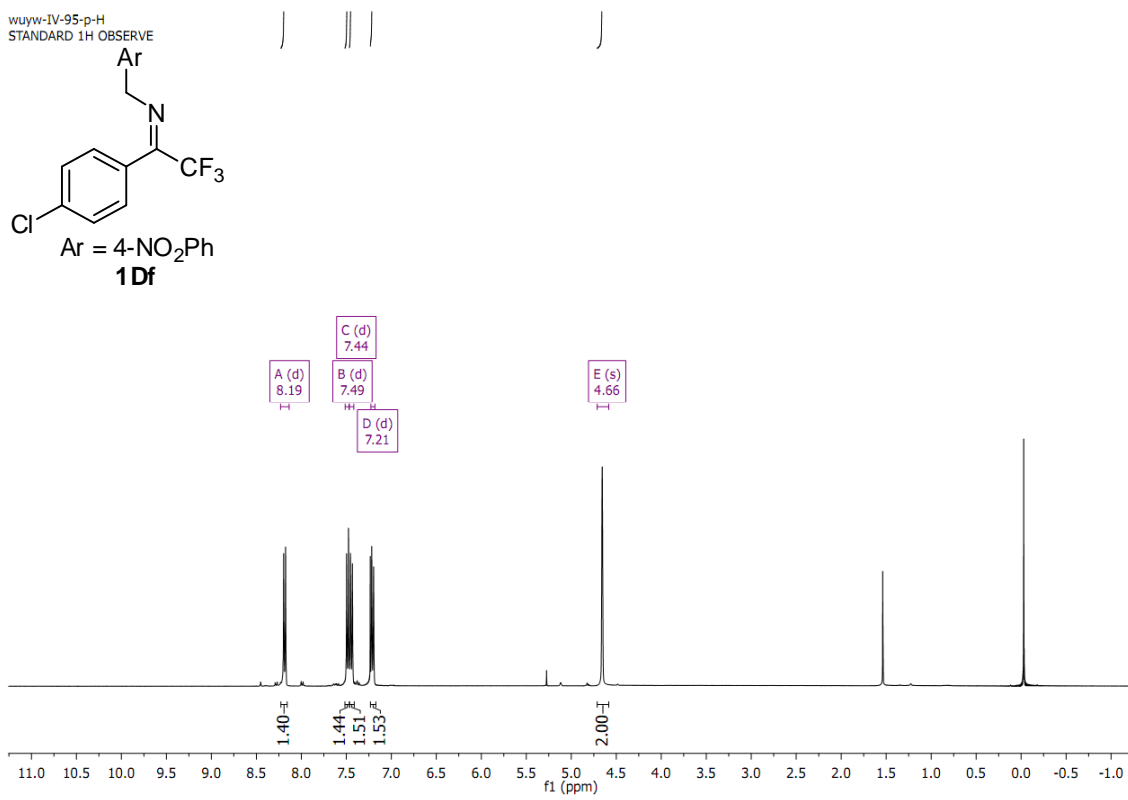



wuyw-IV-95-p-C  
wuyw-IV-95-p-C

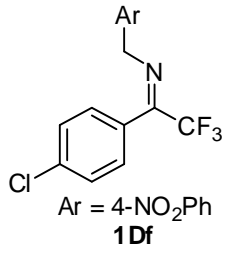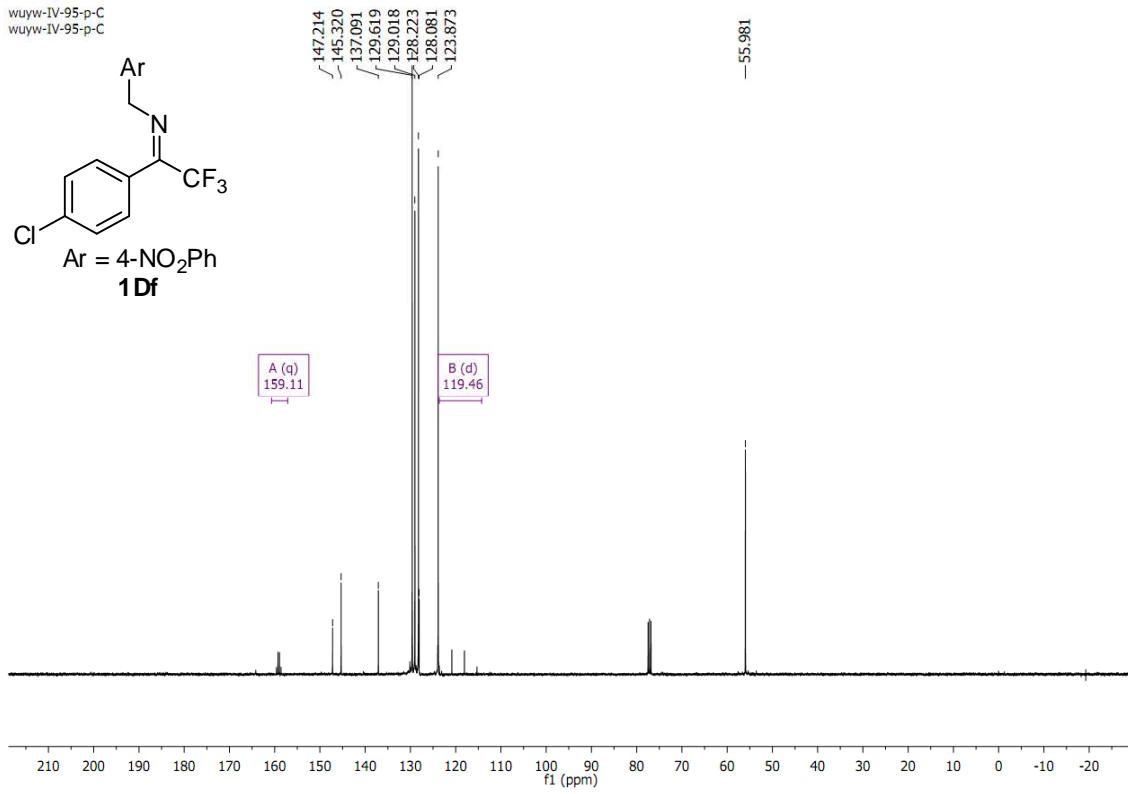

wuyw-IV-95-p-F  
wuyw-VI-95-p-F

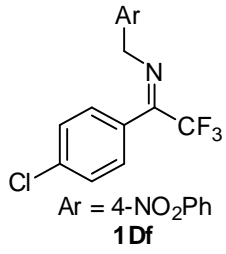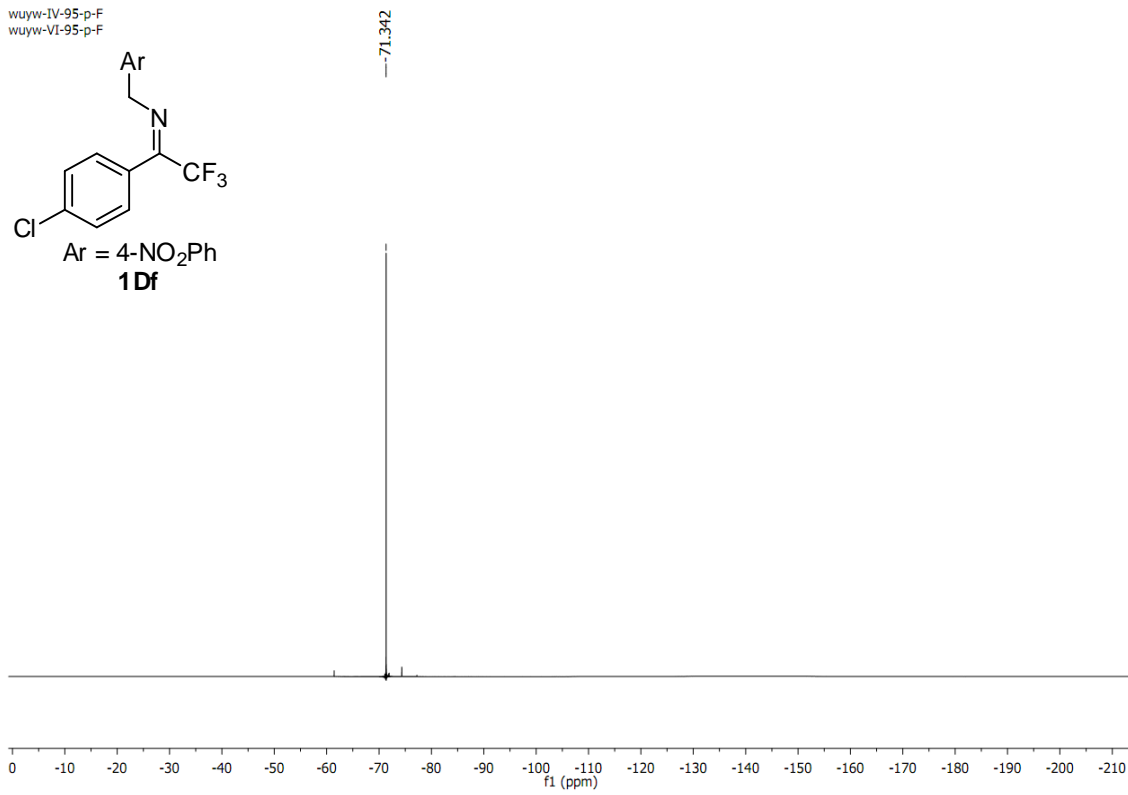

wuyw-IV-111-p-H  
wuyw-IV-111-p-H

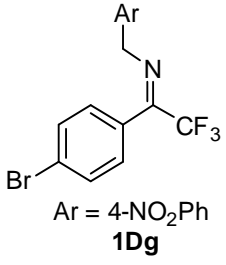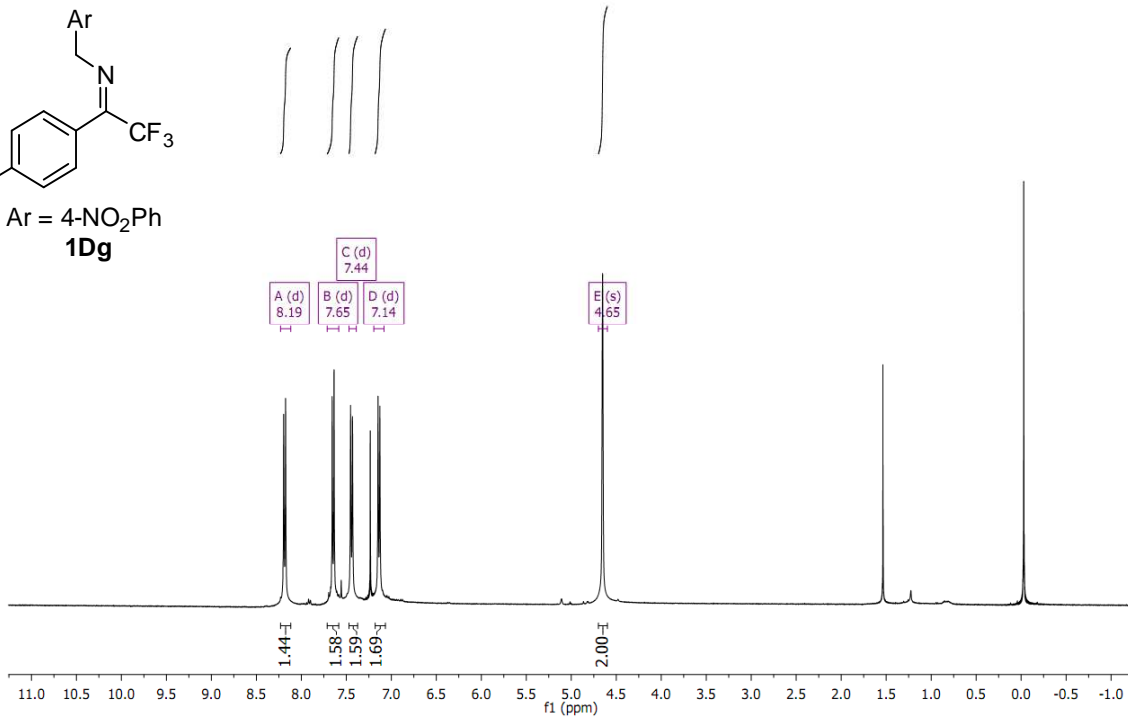

wuyw-IV-111-p-C  
wuyw-IV-111-C

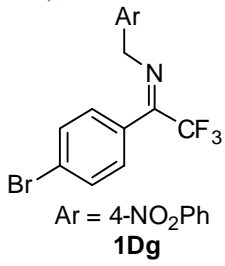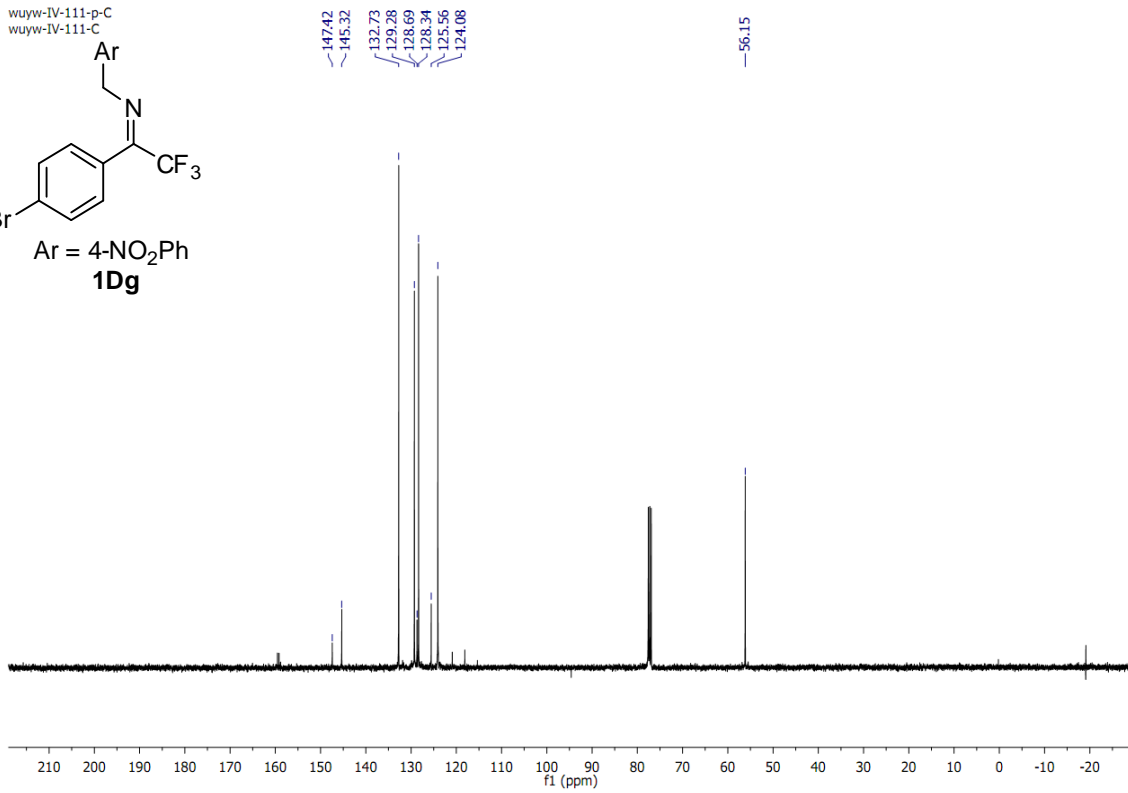

wuyw-IV-111-p-F  
F19 OBSERVE  
STANDARD PARAMETERS

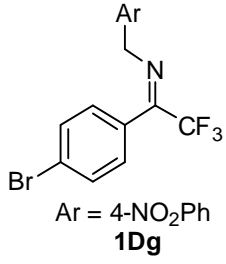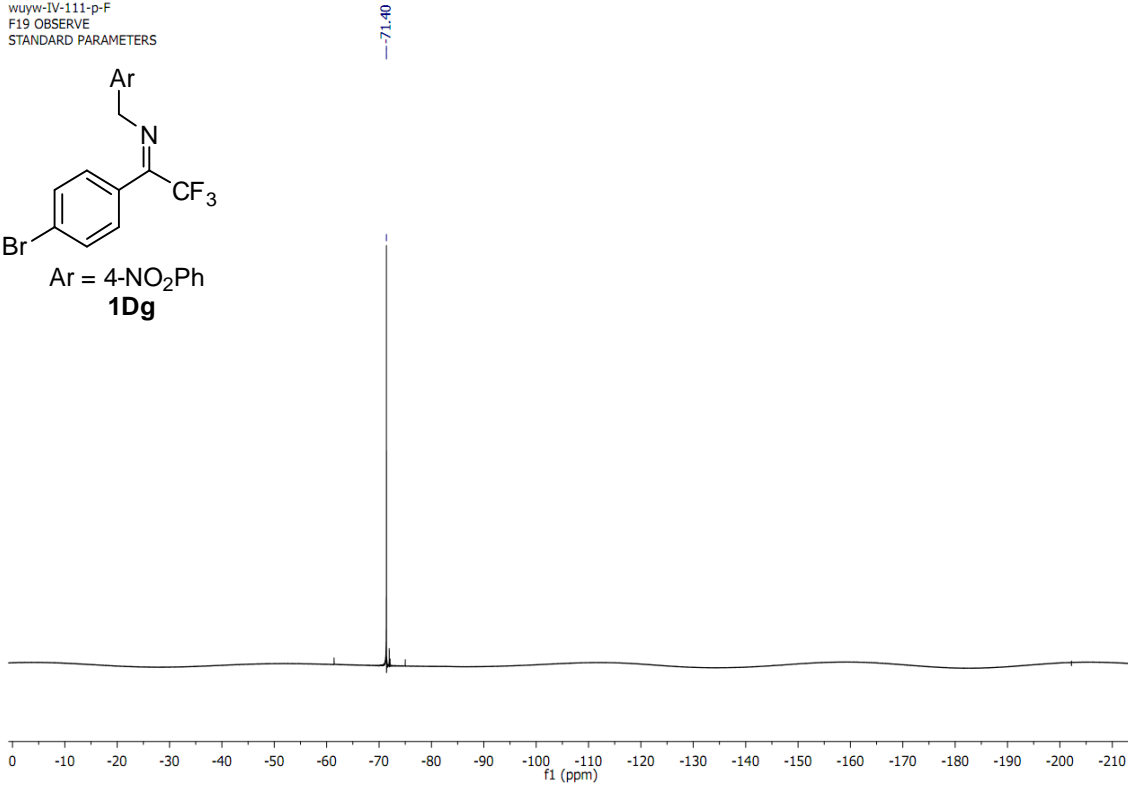

wuyw-VI-39-p-H  
wuyw-VI-39-p-H

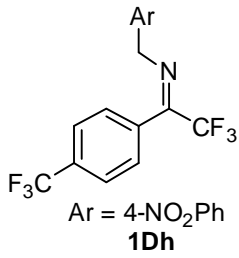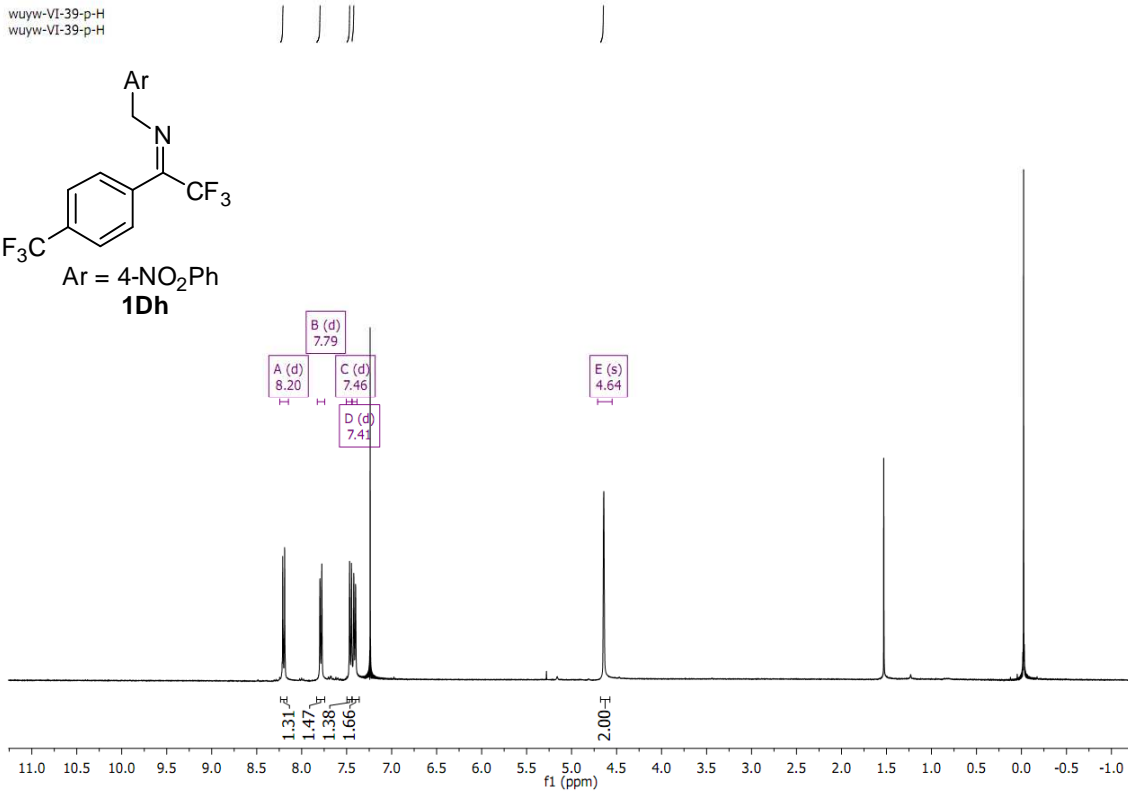

wuyw-VI-39-p-C  
13C OBSERVE

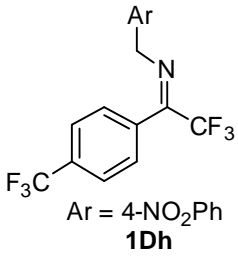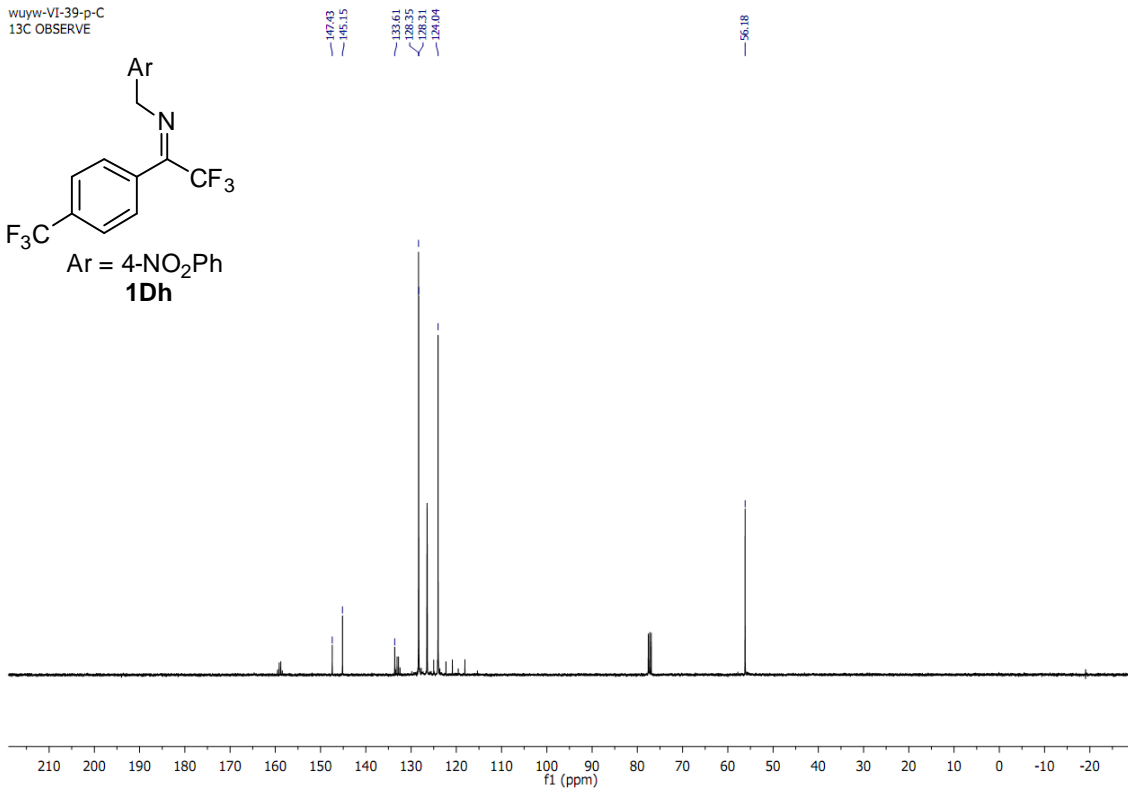

wuyw-VI-39-p-F  
wuyw-VI-39-p-F

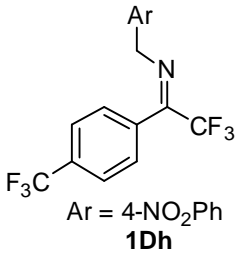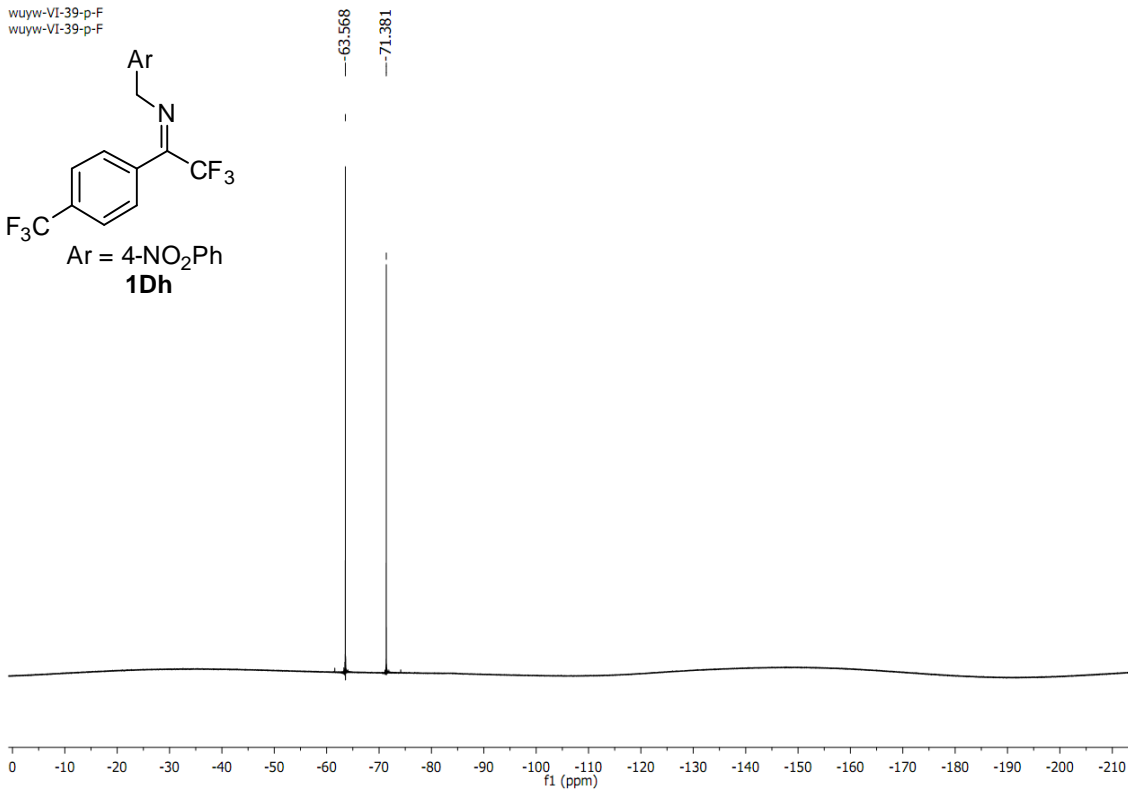

wuyw-VI-32-C1-32  
wuyw-VI-32-C1-32

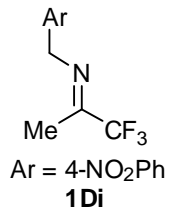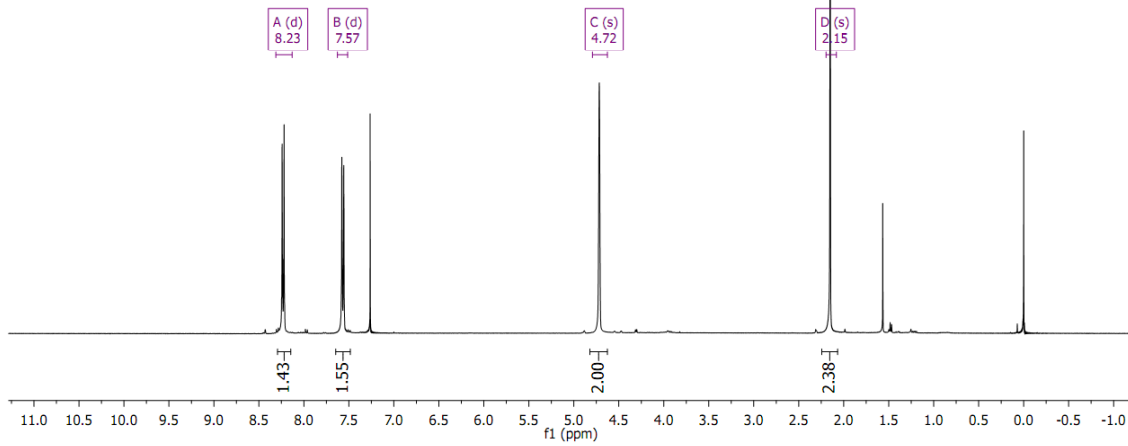

wuyw-VI-32-p-C  
wuyw-VI-31-p-C

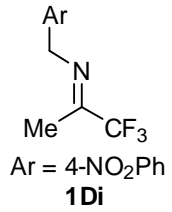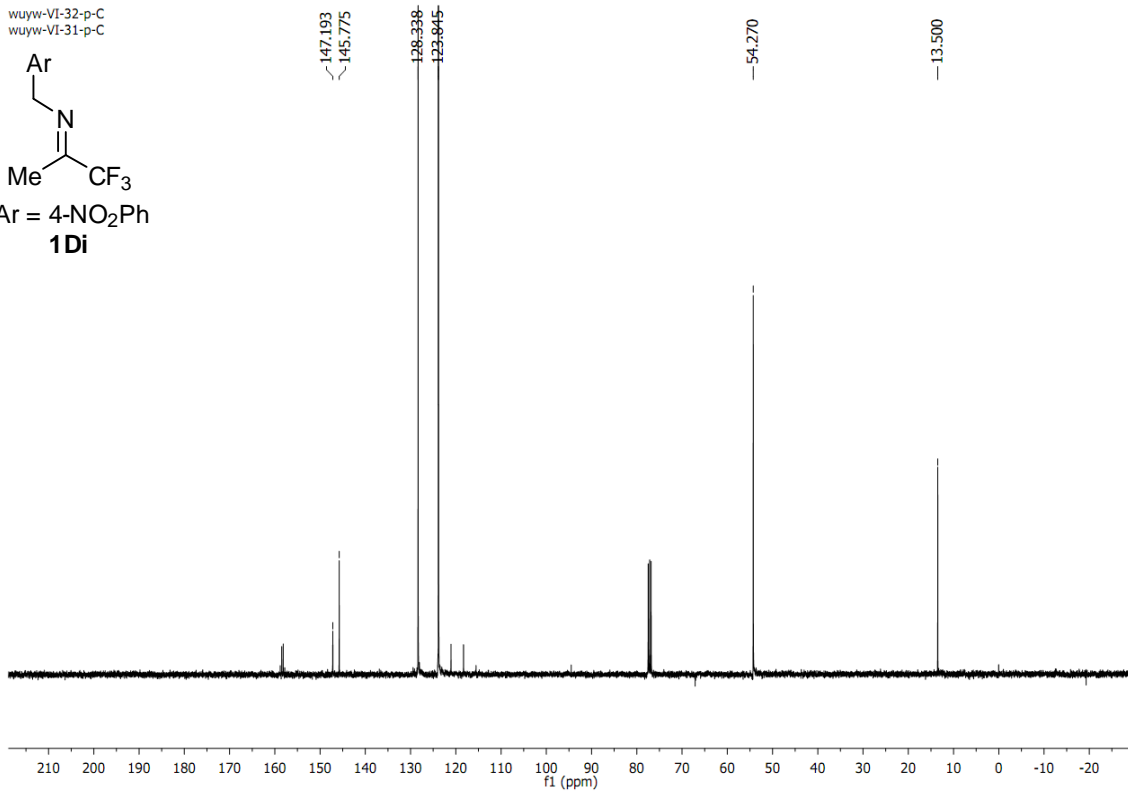

wuyw-VI-32-C1-32-F  
wuyw-VI-32-C1-32-F

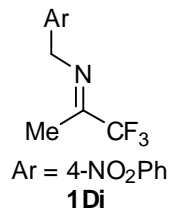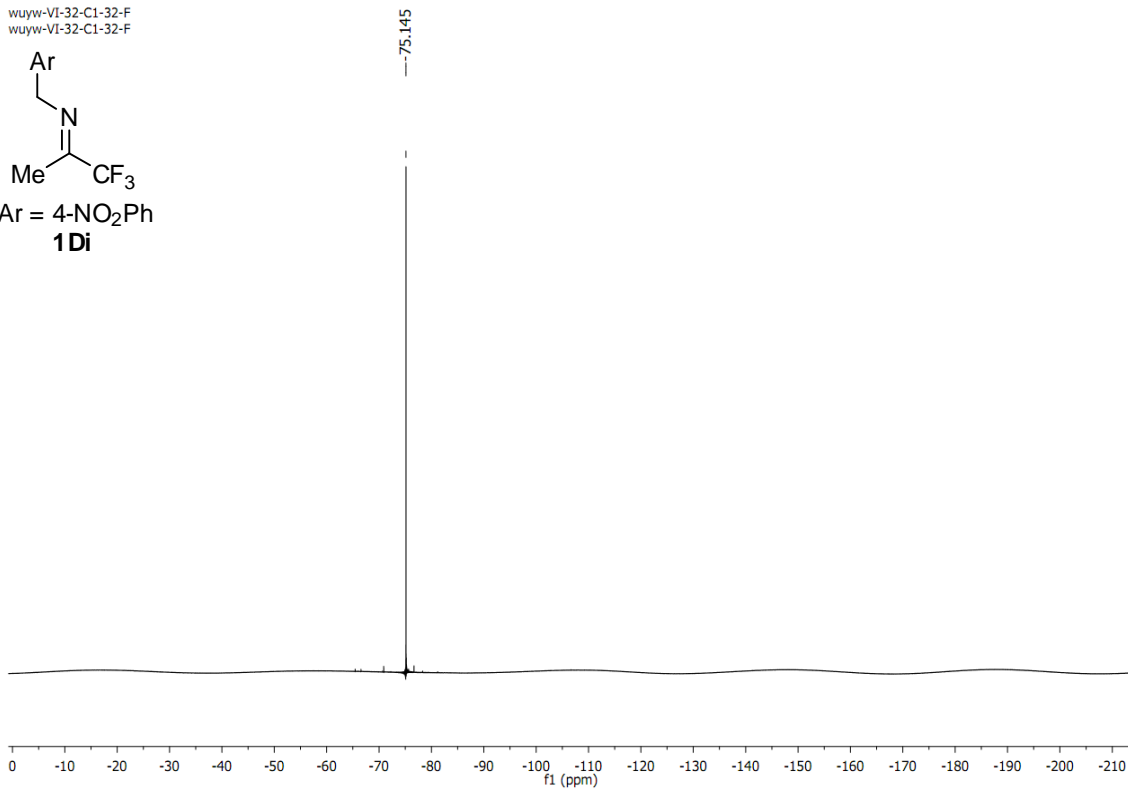

wuyw-V-142-C1-S2-2  
wuyw-V-142-C1-S2-2

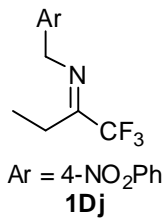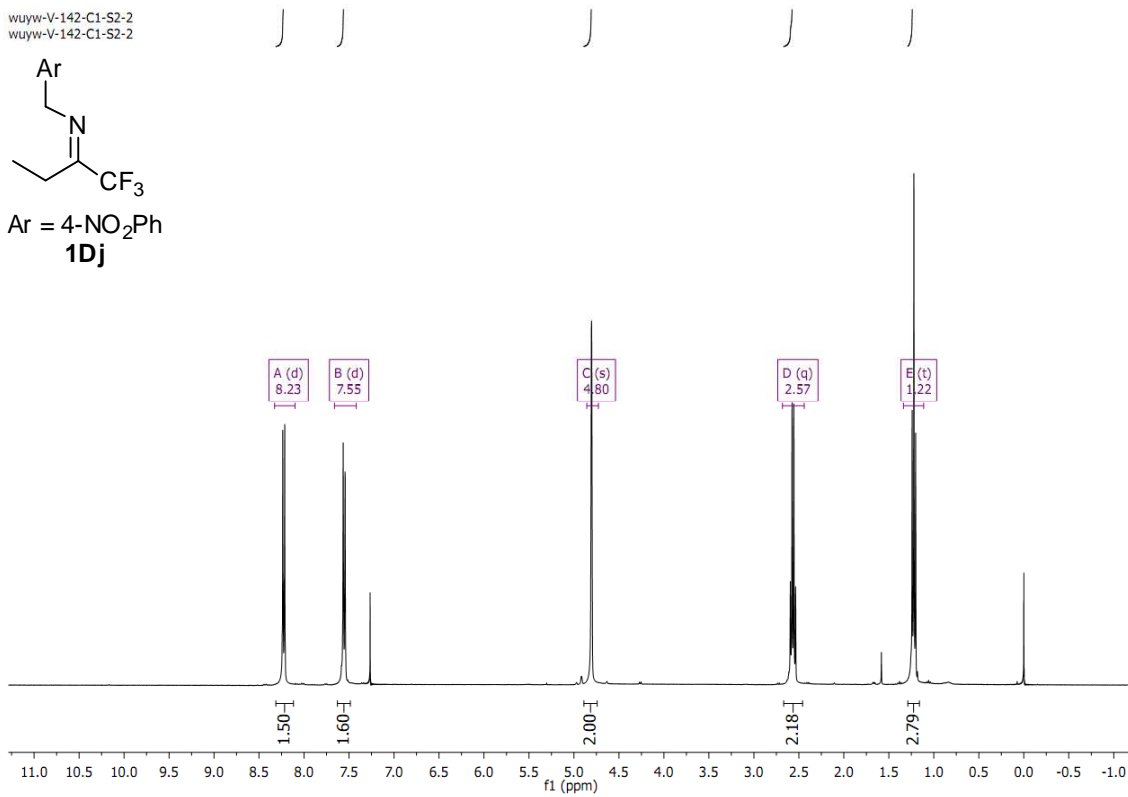

wuyw-VI-68-p-C  
wuyw-VI-68-p-C

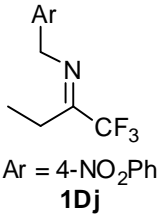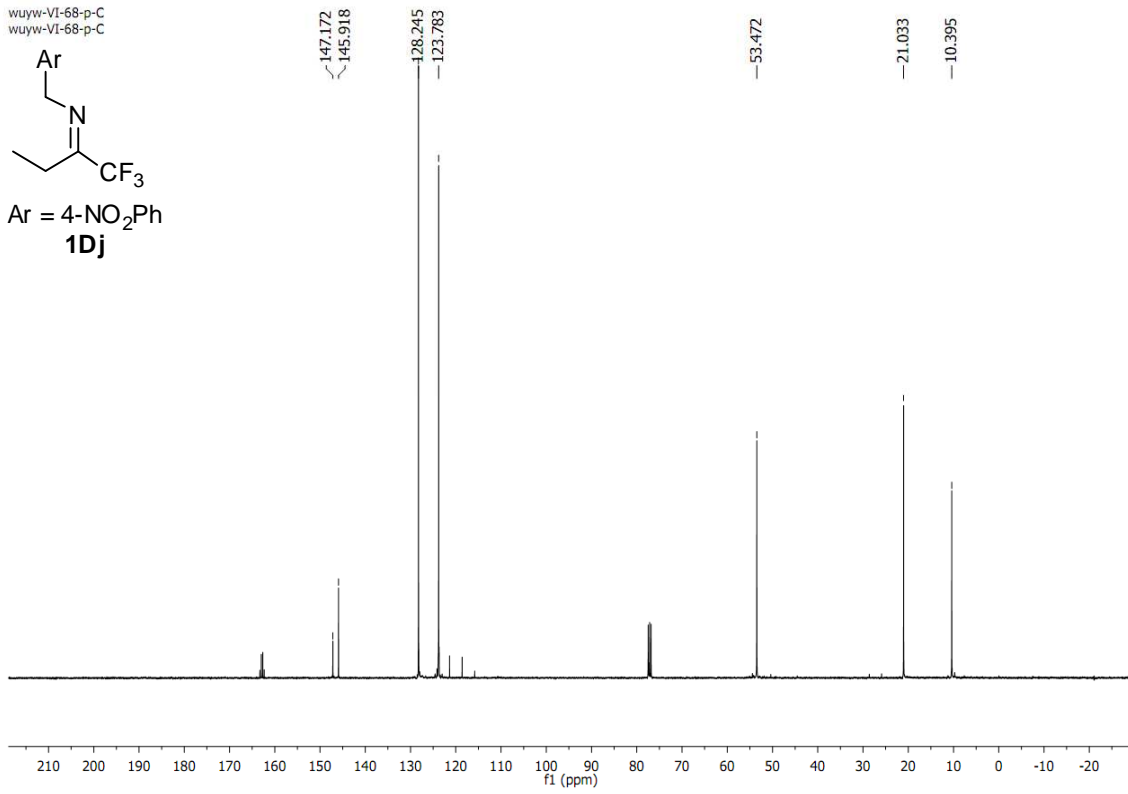

wuyw-VI-68-p-F  
F19 OBSERVE  
STANDARD PARAMETERS

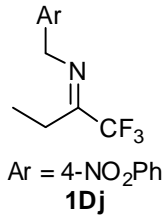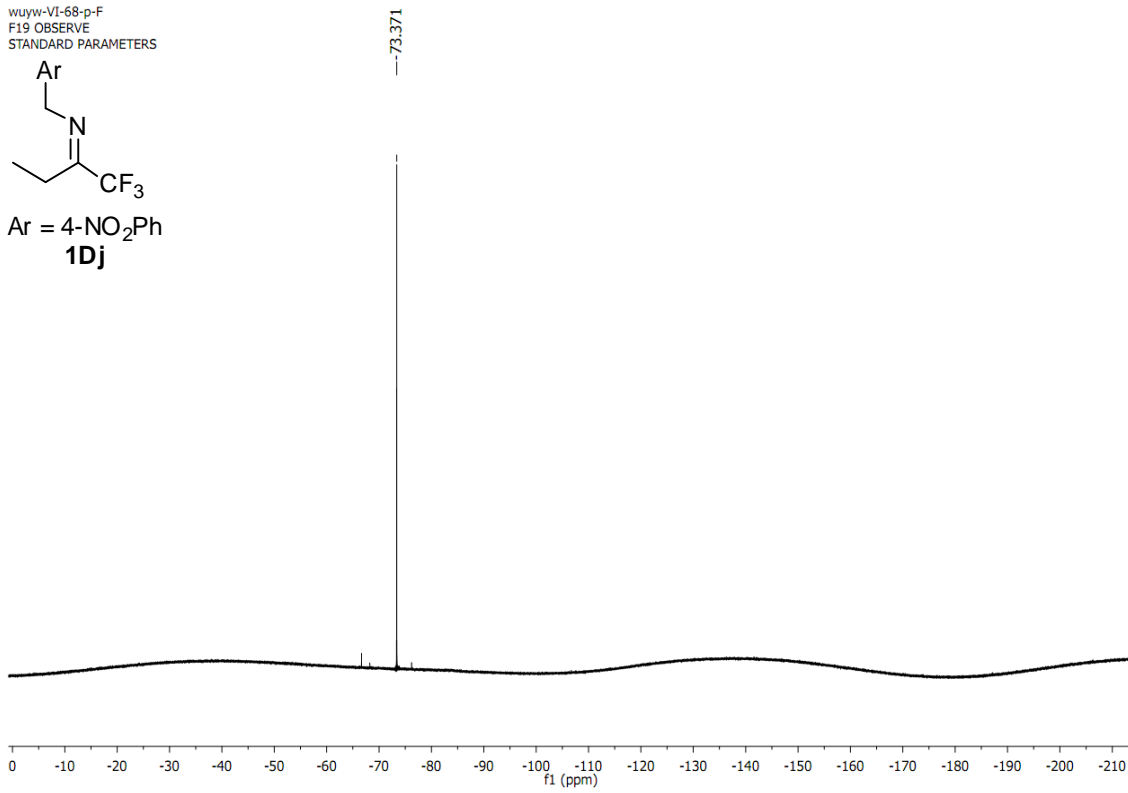

wuyw-VI-43-p-2-H  
wuyw-VI-43-p-H

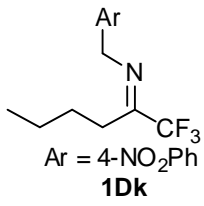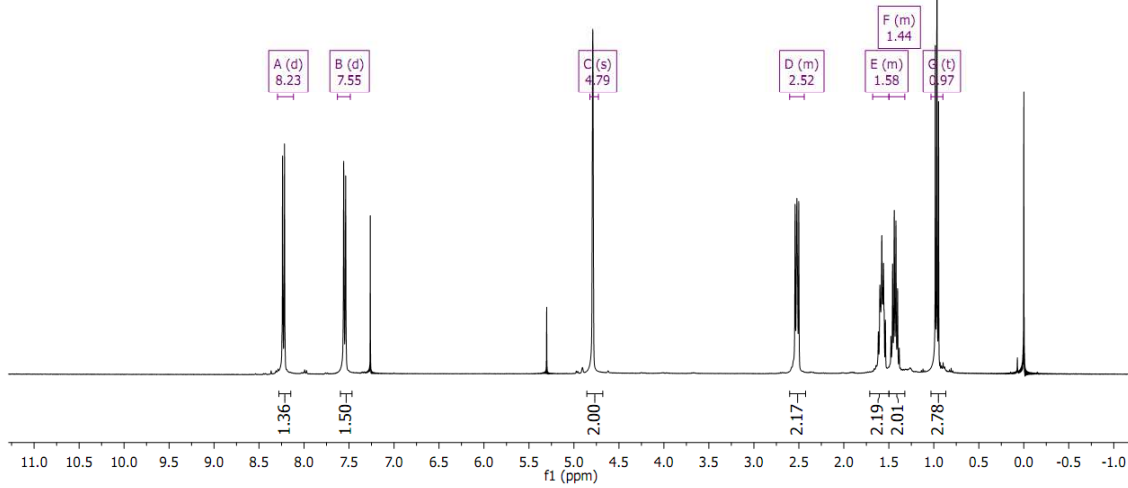

wuyw-VI-43-p-2-C  
wuyw-VI-43-p-2-C

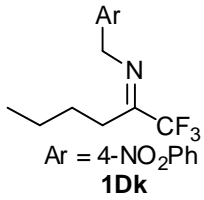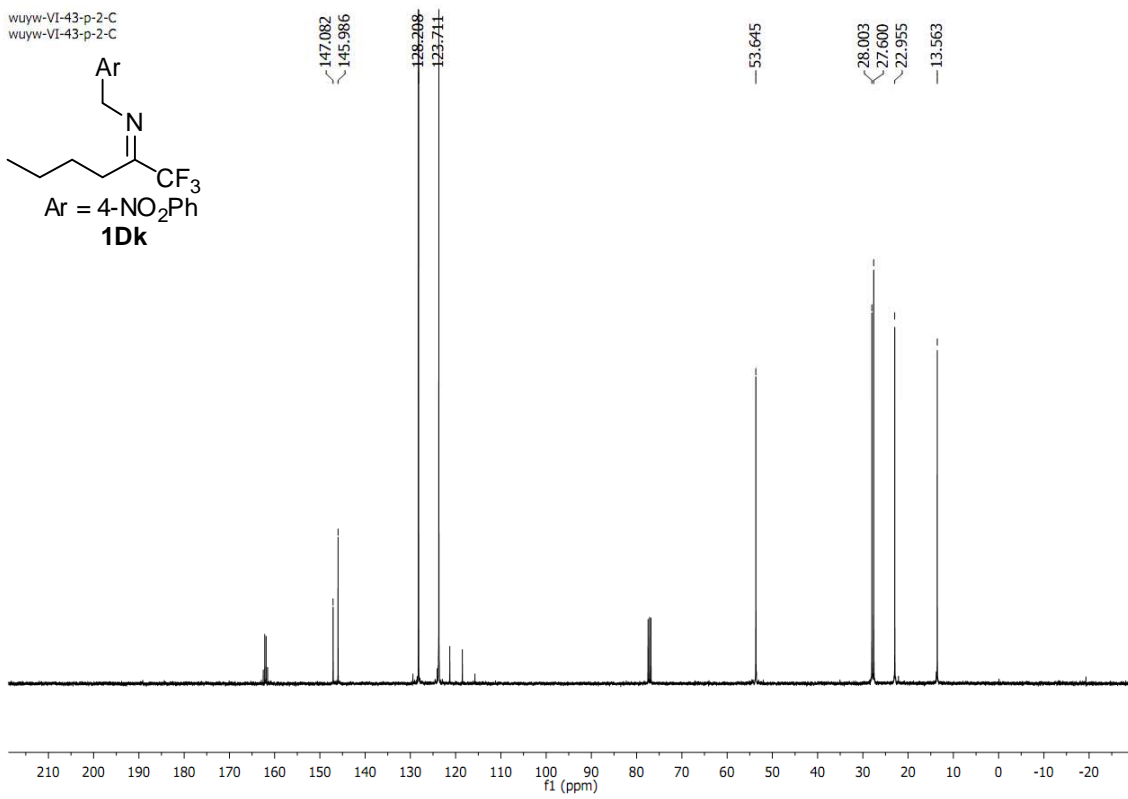



wuyw-VI-43-p-2-F  
F19 OBSERVE  
STANDARD PARAMETERS

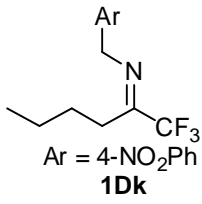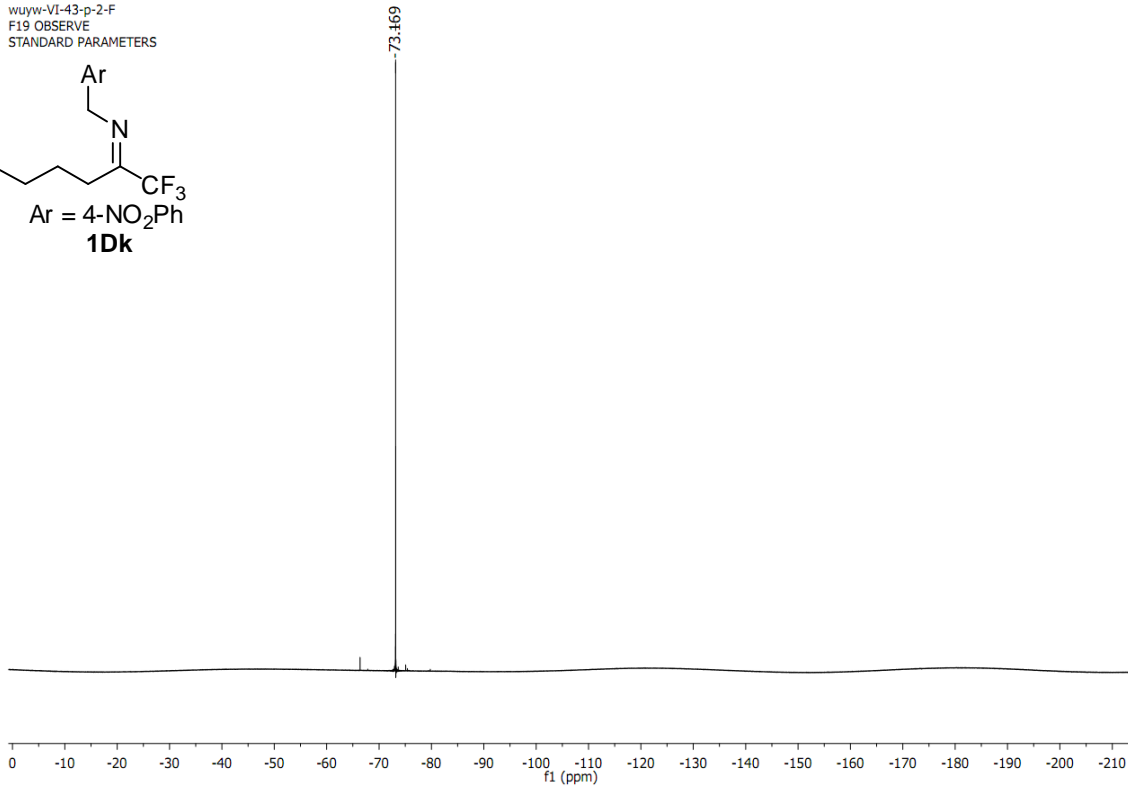

wuyw-VI-58-p-2  
wuyw-VI-58-p-2

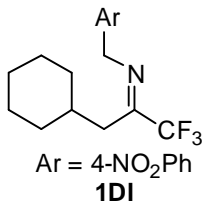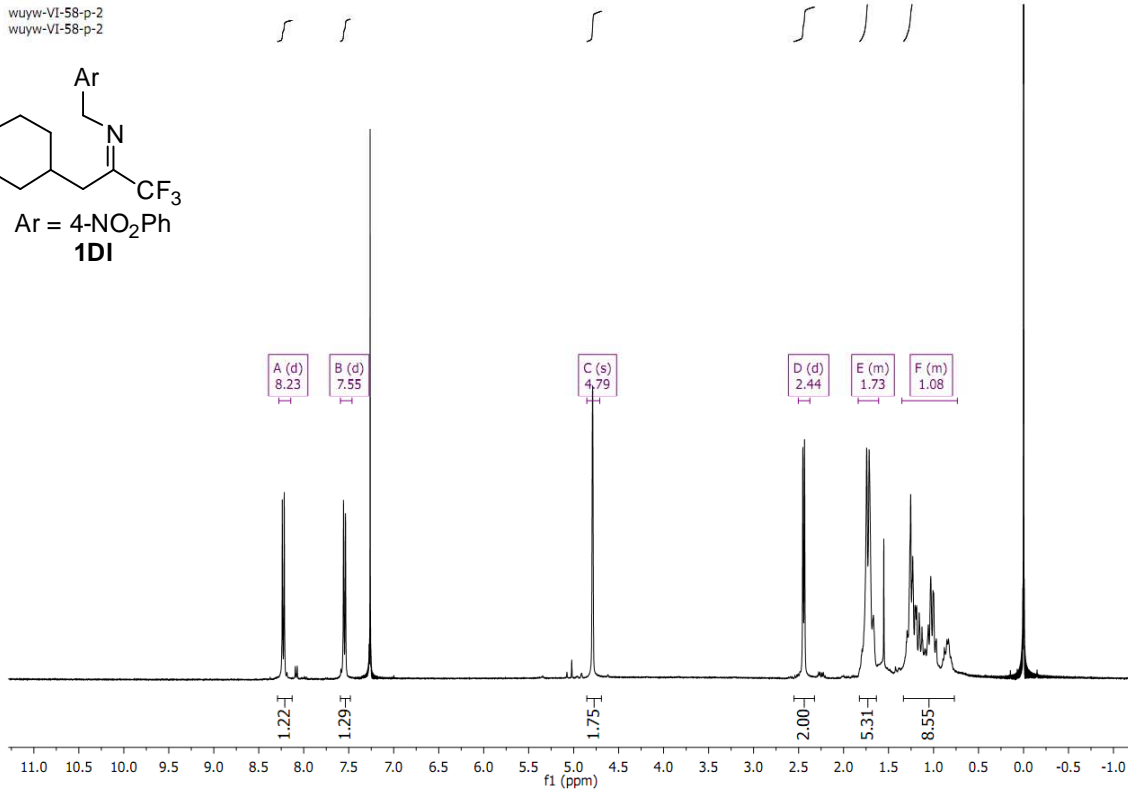

wuyw-VI-58-p-2-C  
wuyw-VI-58-p-2-C

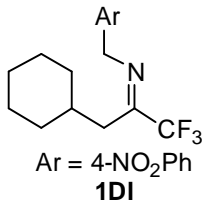

147.203  
146.300

128.338  
123.833

54.392

36.213  
35.574  
33.588  
26.257  
26.082

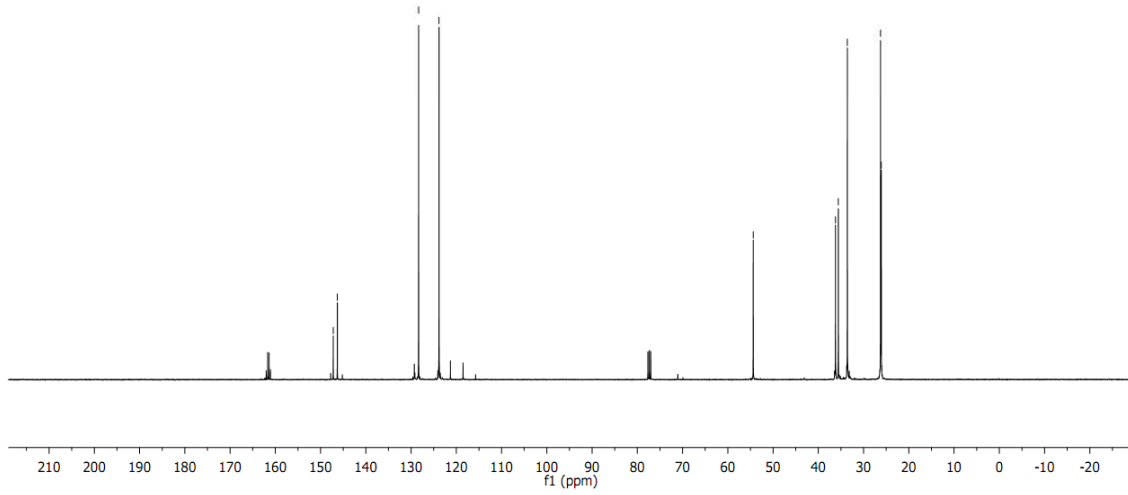

wuyw-VI-58-p-2-F  
F19 OBSERVE  
STANDARD PARAMETERS

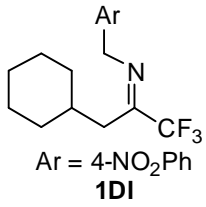

72.029

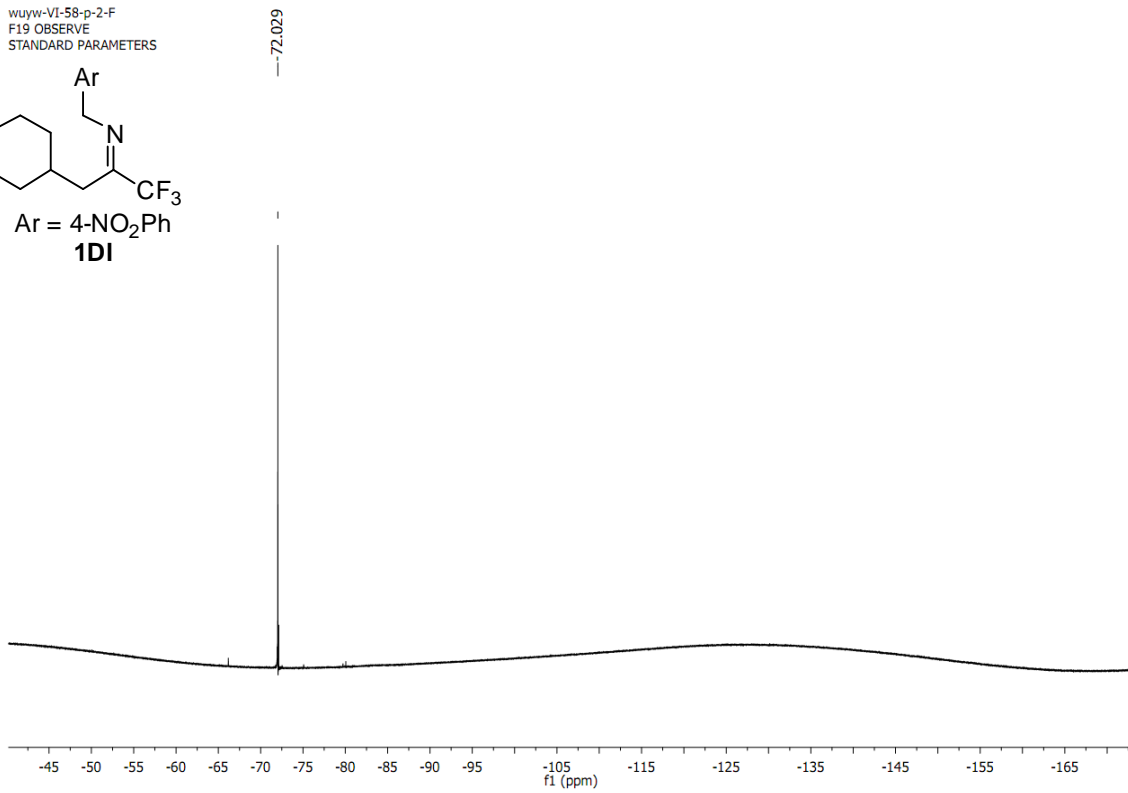

wuyw-VI-67-S2-2  
wuyw-VI-67-S3-2

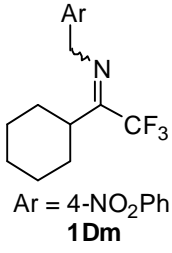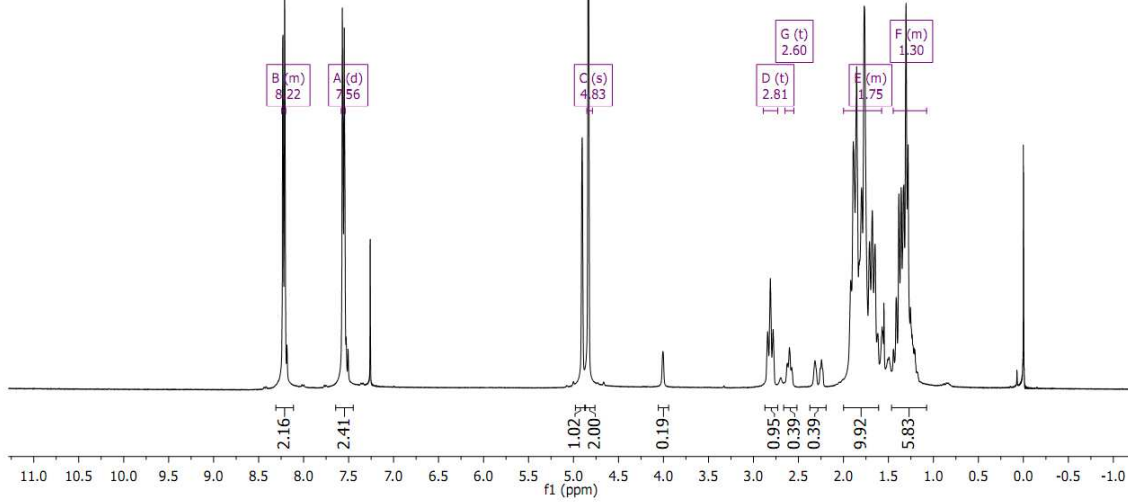

wuyw-VI-67-S3-C  
13C OBSERVE

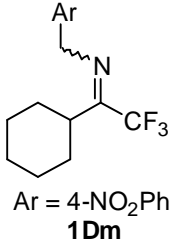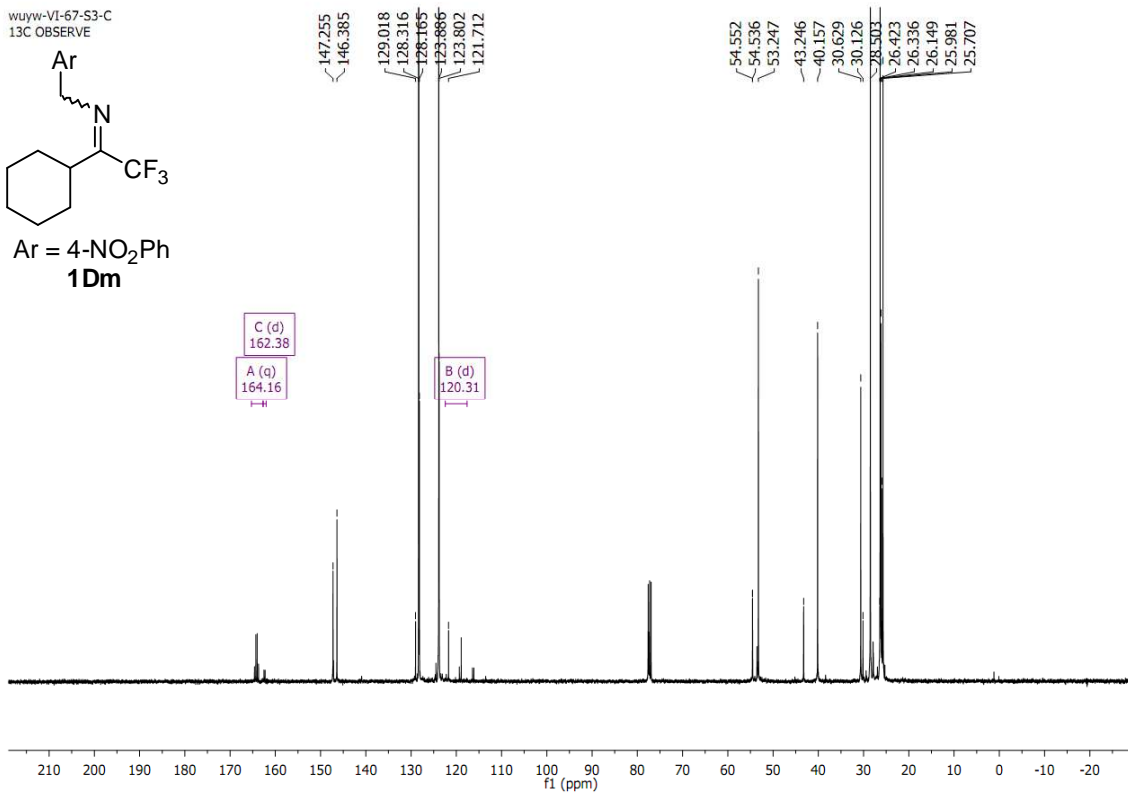

wuyw-VI-67-S3-F-2  
F19 OBSERVE  
STANDARD PARAMETERS

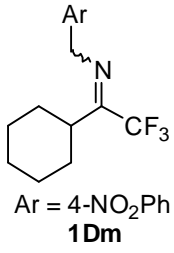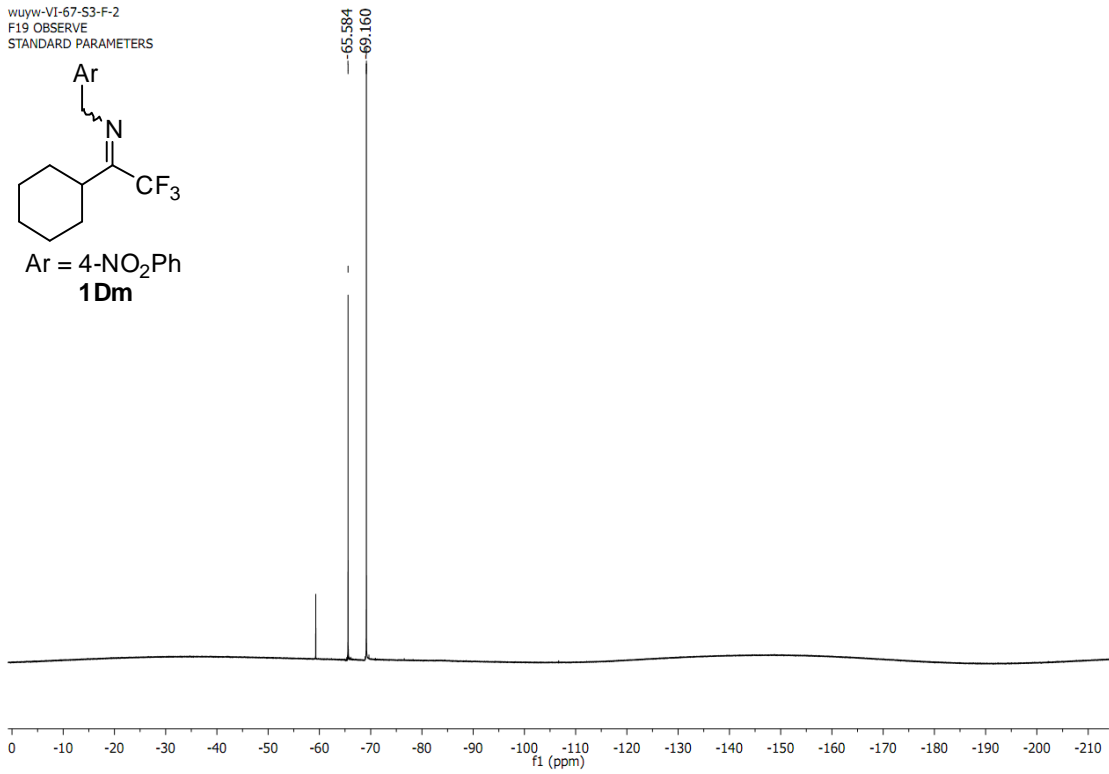

wuyw-VI-37-p-H  
wuyw-VI-37-p-H

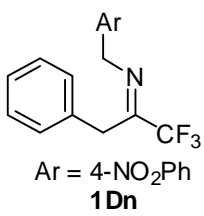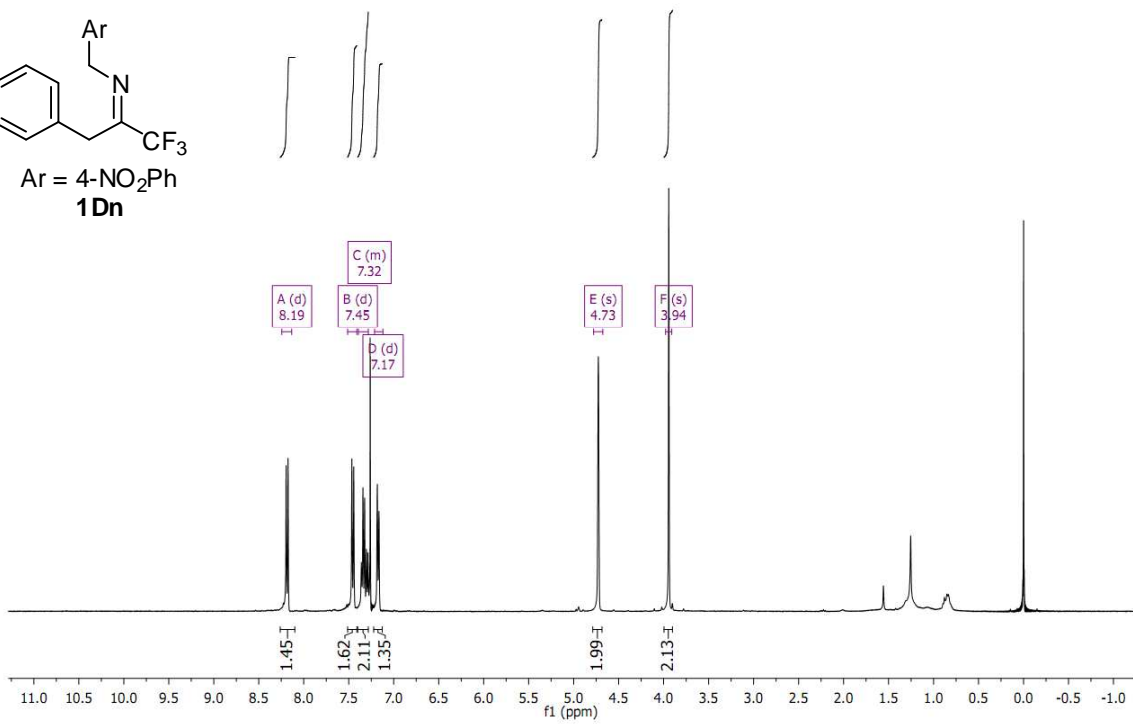

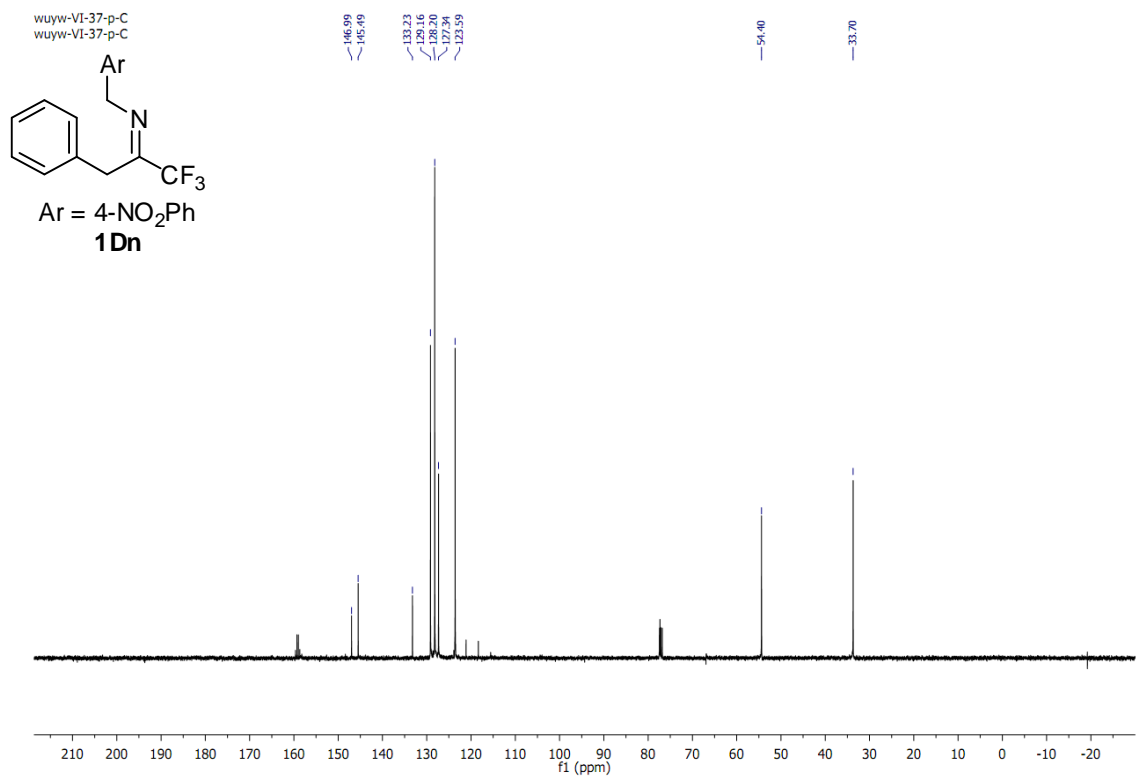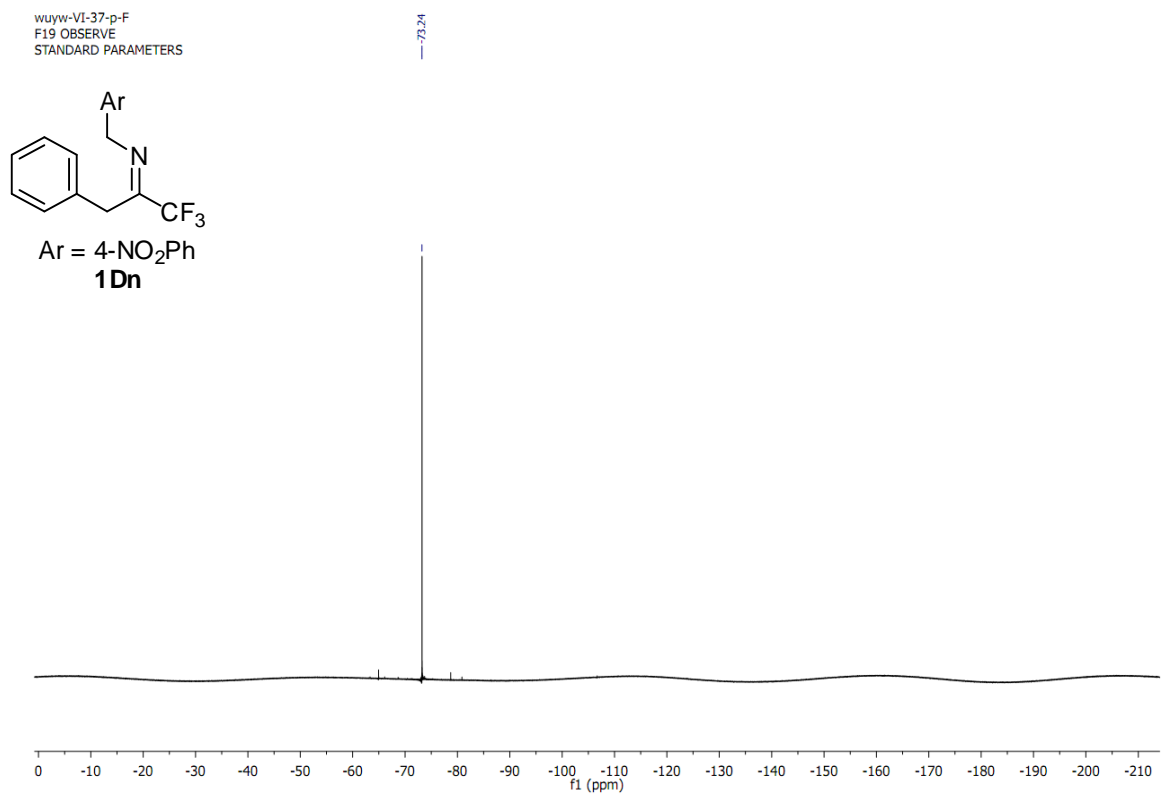

# $^1\text{H}$ and $^{13}\text{C}$ NMR spectra and HPLC spectra for **Amine 2**

wuyw-VI-81-subs  
wuyw-VI-81-subs

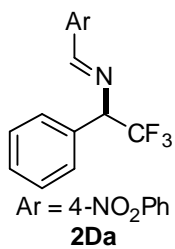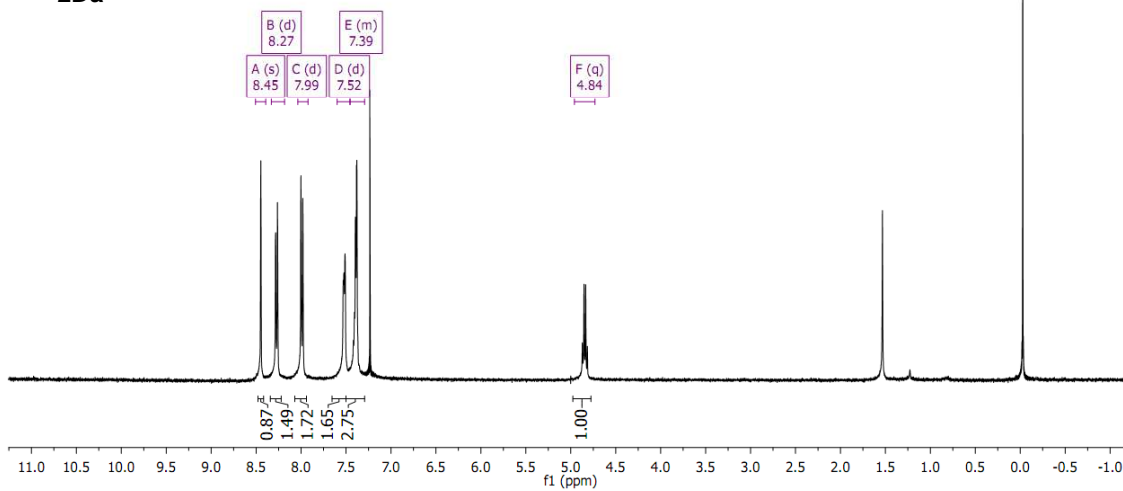

wuyw-V-143-5-C  
13C OBSERVE

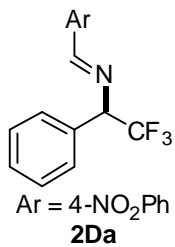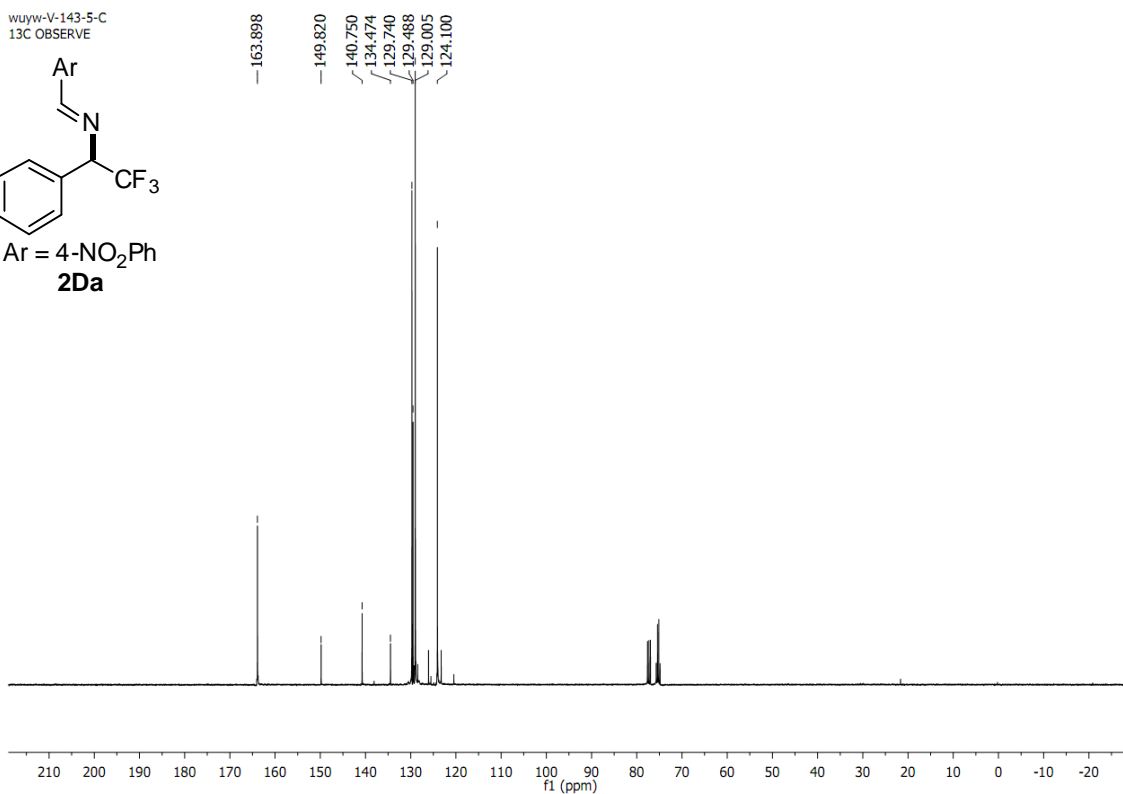

wuyw-V-143-5-F  
F19 OBSERVE  
STANDARD PARAMETERS

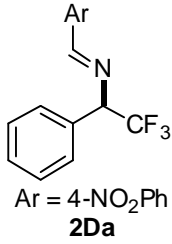

74.100  
74.119

A (d)  
74.11

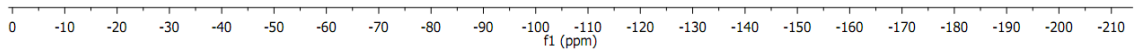

Data File C:\CHEM32\1\DATA\WUYW\WUYW-V-143-5-RAC-2.D  
Sample Name: wuyw-V-143-5-rac

```
-----
Acq. Operator   : wuyw
Acq. Instrument : Instrument 1
Injection Date  : 4/30/2012 12:20:32 PM
Acq. Method    : C:\CHEM32\1\METHODS\METHOD1.M
Last changed   : 4/30/2012 12:16:52 PM by wuyw
                (modified after loading)
Analysis Method: C:\CHEM32\1\METHODS\METHOD1.M
Last changed   : 4/24/2012 11:01:01 AM by DAVID
                (modified after loading)
Sample Info    : AD, Hex/IPA=80/20, 1.0 mL/min, 254nm, left, 25C, 28bar
Inj Volume     : 8 µl
-----
```

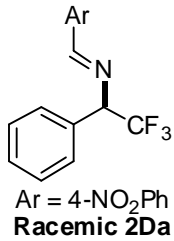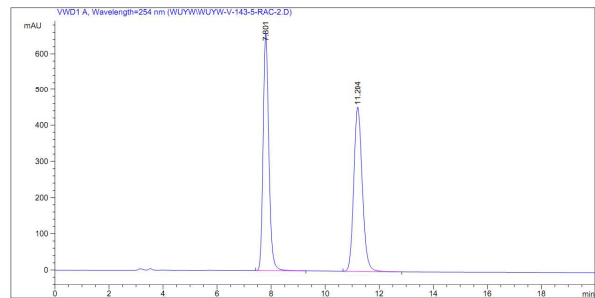

Area Percent Report

```
-----
Sorted By      : Signal
Multiplier     : 1.0000
Dilution       : 1.0000
Sample Amount  : 5.00000 [ng/ul] (not used in calc.)
Use Multiplier & Dilution Factor with IIFDs
-----
```

Signal 1: VWD1 A, Wavelength=254 nm

| Peak #   | RetTime [min] | Type | Width [min] | Area [mAU*s] | Height [mAU] | Area %  |
|----------|---------------|------|-------------|--------------|--------------|---------|
| 1        | 7.801         | BB   | 0.2247      | 9660.23145   | 659.88828    | 49.2992 |
| 2        | 11.204        | BB   | 0.3383      | 9934.87402   | 453.98557    | 50.7008 |
| Totals : |               |      |             | 1.95951e4    | 1113.84384   |         |

\*\*\* End of Report \*\*\*

Instrument 1 5/1/2012 10:34:51 AM DAVID

Page 1 of 1

Data File C:\CHEM32\1\DATA\WUYW\WUYW-U-143-5-2.D  
 Sample Name: wuyw-V-143-5

-----  
 Acq. Operator : wuyw Seq. Line : 3  
 Acq. Instrument : Instrument 1 Location : Vial 21  
 Injection Date : 11/22/2011 10:58:16 PM Inj : 1  
 Different Inj Volume from Sequence 1 Actual Inj Volume : 6 µl  
 Acq. Method : C:\CHEM32\1\METHODS\METHOD1.M Inj Volume : 8 µl  
 Last changed : 11/22/2011 10:55:51 PM by wuyw  
 (modified after loading)  
 Analysis Method : C:\CHEM32\1\METHODS\METHOD1.M  
 Last changed : 11/23/2011 5:51:02 PM by wuyw  
 Sample Info : AD, Hex/IFA=80/20, 1.0 mL/min, 254nm, 25C, 28bar, left  
 -----

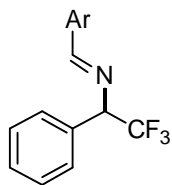

Ar = 4-NO<sub>2</sub>Ph

**(R)-2Da, 90% ee from  
 10 mol% DHQ-7f  
 catalyzed reaction.**

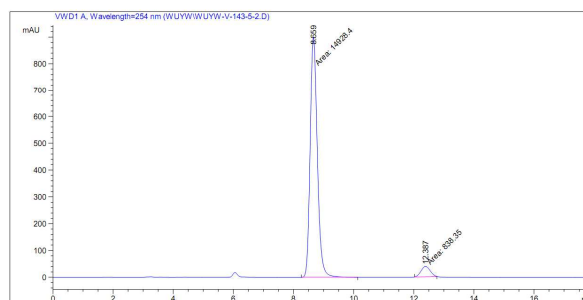

Area Percent Report

-----  
 Sorted By : Signal  
 Multiplier : 1.0000  
 Dilution : 1.0000  
 Use Multiplier & Dilution Factor with ISTDs  
 -----  
 Signal 1: VWD1 A, Wavelength=254 nm  

| Peak # | RetTime [min] | Type | Width [min] | Area [mAU*s] | Height [mAU] | Area %  |
|--------|---------------|------|-------------|--------------|--------------|---------|
| 1      | 8.659         | MM   | 0.2767      | 1.49284e4    | 899.14563    | 94.6828 |
| 2      | 12.387        | MM   | 0.3569      | 838.34991    | 39.14538     | 5.3172  |

 -----  
 Totals : 1.57668e4 938.29101  
 -----  
 \*\*\* End of Report \*\*\*

Created with novaPDF Printer ([www.novapdf.com](http://www.novapdf.com)). Please register to remove this message.

Page 1 of 1

wuyw-IV-145-rac-H  
 wuyw-VI-19-p-H

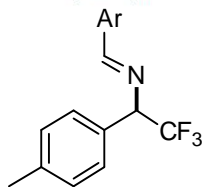

Ar = 4-NO<sub>2</sub>Ph  
**2Db**

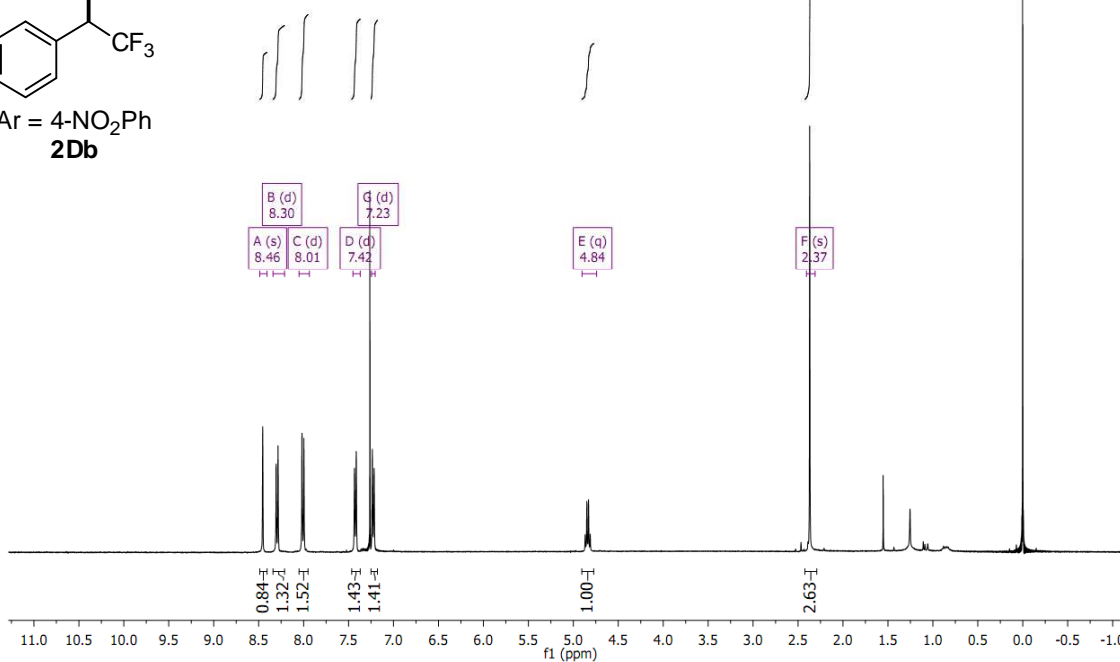



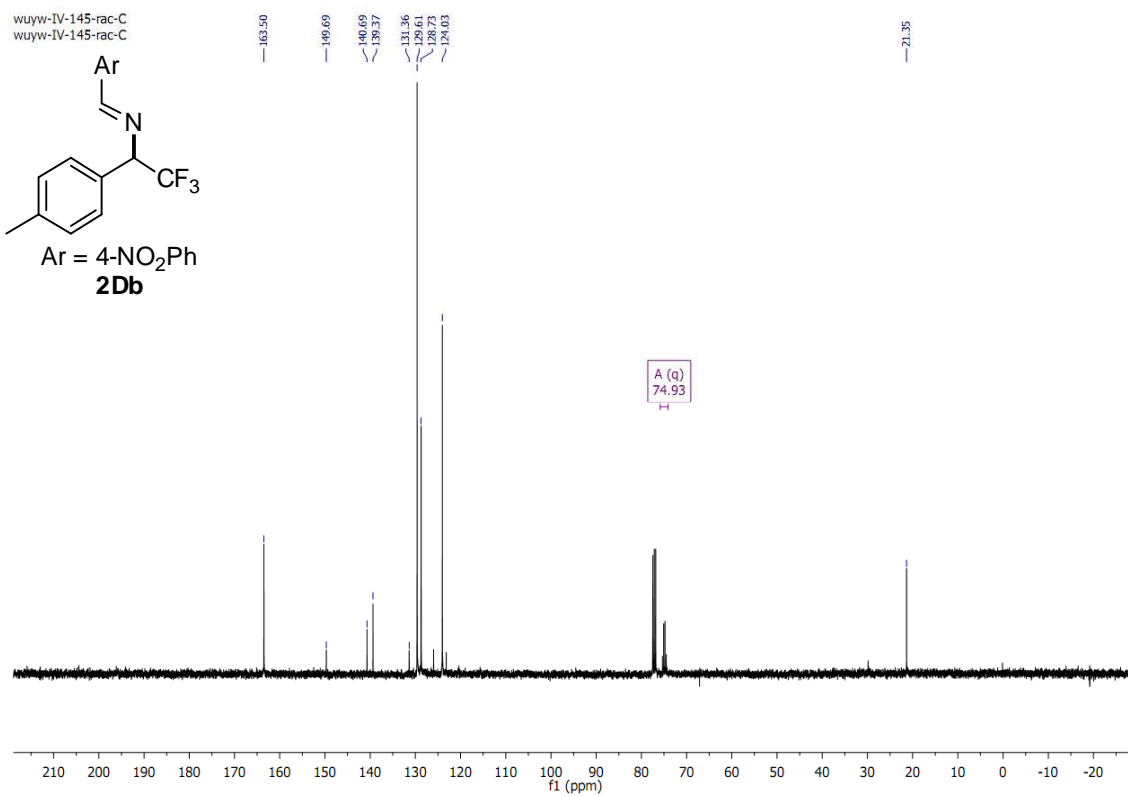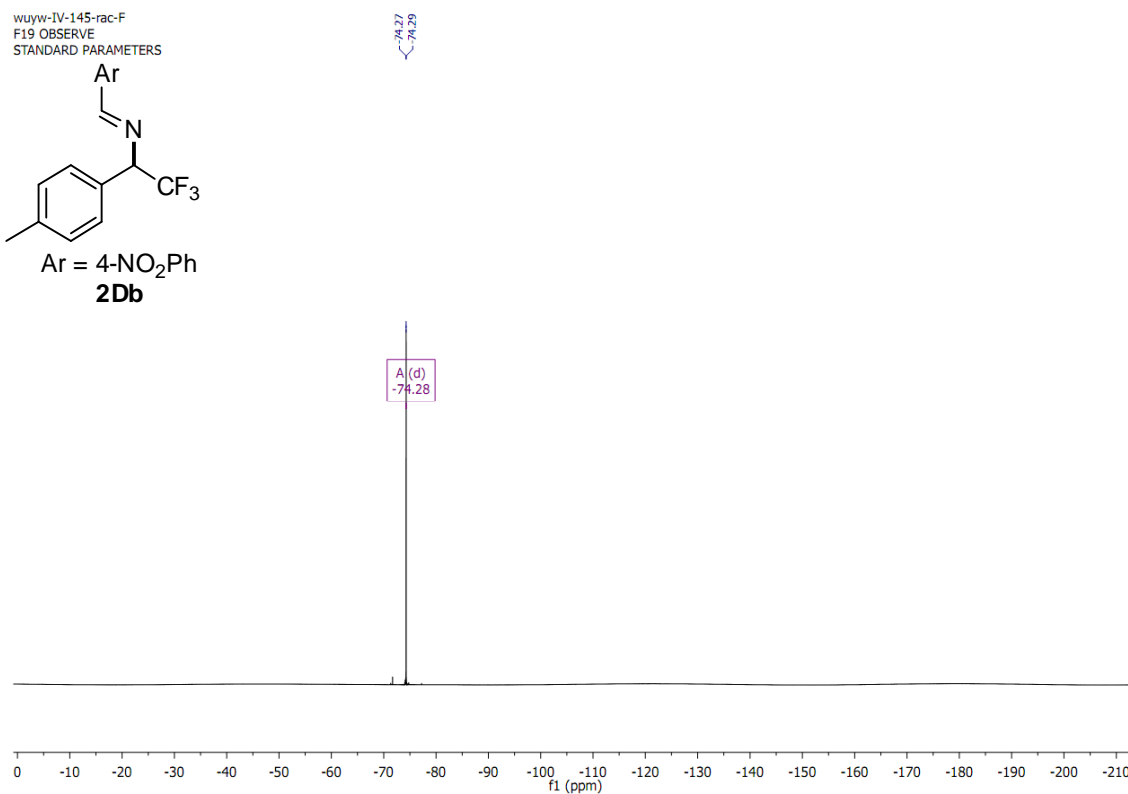

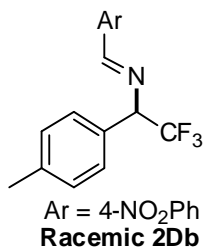

Data File C:\CHEM32\1\DATA\MUVW\WUYW-V-145-RAC-1.D  
 Sample Name: wuyw-v-145-rac

```

-----
Acq. Operator   : wuyw
Acq. Instrument : Instrument 1          Location : Vial 21
Injection Date  : 4/30/2012 1:39:21 PM      Inj Volume : 8 µl
Acq. Method    : C:\CHEM32\1\METHODS\METHOD1.M
Last changed   : 4/30/2012 11:37:14 PM by wuyw
                (modified after loading)
Analysis Method: C:\CHEM32\1\METHODS\METHOD1.M
Last changed   : 4/24/2012 11:01:01 AM by DAVID
                (modified after loading)
Sample Info    : O3-H, Hex/IPA=70/30, 1.0 mL/min, 254nm, left, 25C, 66ba
                r
    
```

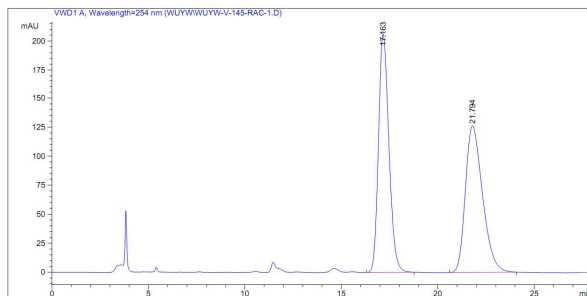

Area Percent Report

```

-----
Sorted By      : Signal
Multiplier     : 1.0000
Dilution      : 1.0000
Sample Amount  : 8.00000 [ng/ul] (not used in calc.)
Use Multiplier & Dilution Factor with ISTDs

Signal 1: VWD1 A, Wavelength=254 nm

Peak RetTime Type Width Area Height Area
# [min] [min] [min] mAU *s [mAU] %
-----|-----|-----|-----|-----|-----
1 17.163 BB 0.5760 7724.16553 206.56525 49.7810
2 21.794 BB 0.9480 7792.11914 126.35801 50.2190
Totals : 1.55163e4 332.92326

*** End of Report ***
    
```

Instrument 1 5/1/2012 10:36:44 AM DAVID

Page 1 of 1

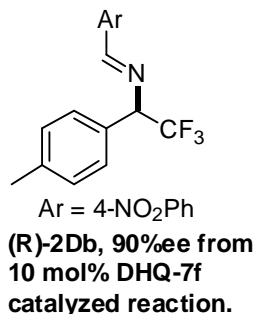

Data File C:\CHEM32\1\DATA\MUVW\WUYW-V-145-1.D  
 Sample Name: wuyw-v-145

```

-----
Acq. Operator   : wuyw
Acq. Instrument : Instrument 1          Location : Vial 22
Injection Date  : 11/23/2011 10:57:23 PM      Inj Volume : 8 µl
Different Inj Volume from Sequence 1 Actual Inj Volume : 6 µl
Acq. Method    : C:\CHEM32\1\METHODS\METHOD1.M
Last changed   : 11/23/2011 10:42:34 PM by wuyw
                (modified after loading)
Analysis Method: C:\CHEM32\1\METHODS\METHOD1.M
Last changed   : 11/23/2011 5:51:02 PM by wuyw
Sample Info    : O3-H, Hex/IPA = 70/30, 1.0ml/min, 254nm, 25C, left, 65b
                ar
    
```

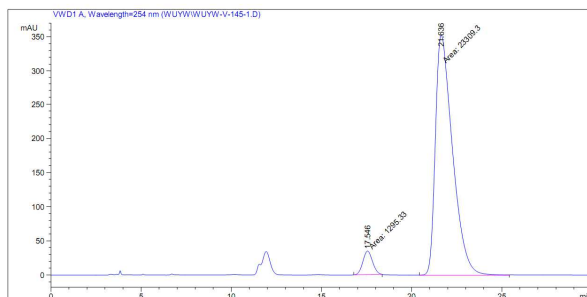

Area Percent Report

```

-----
Sorted By      : Signal
Multiplier     : 1.0000
Dilution      : 1.0000
Use Multiplier & Dilution Factor with ISTDs

Signal 1: VWD1 A, Wavelength=254 nm

Peak RetTime Type Width Area Height Area
# [min] [min] [min] mAU *s [mAU] %
-----|-----|-----|-----|-----|-----
1 17.546 NM 0.6223 1295.32739 34.69467 5.2646
2 21.636 NM 1.1007 2.33093e4 352.94885 94.7354
Totals : 2.46047e4 387.64352

*** End of Report ***
    
```

Int: Created with novaPDF Printer ([www.novapdf.com](http://www.novapdf.com)). Please register to remove this message.

Page 1 of 1

wuyw-V-111-p-H  
wuyw-V-111-p-H

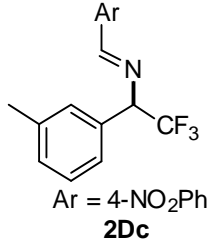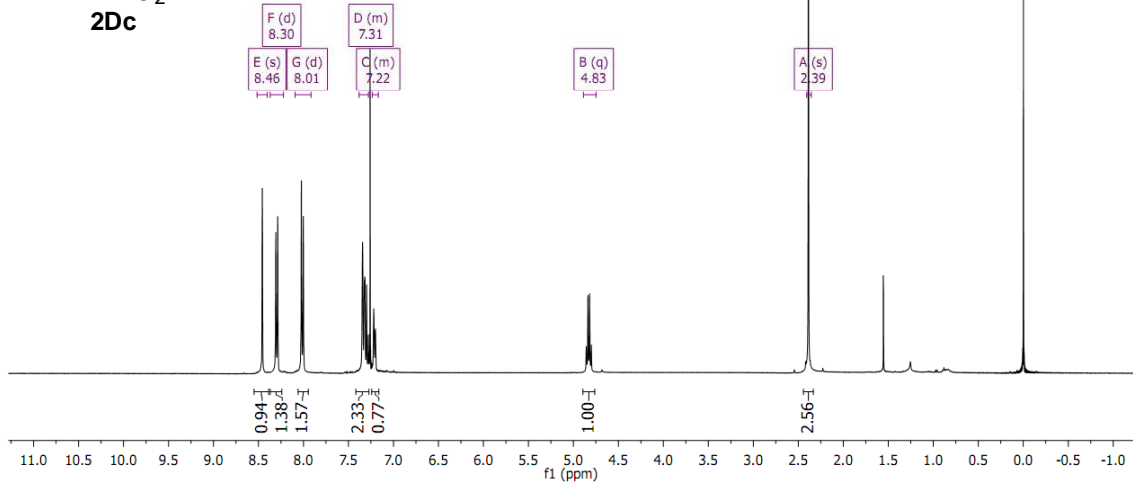

wuyw-V-111-p-C  
wuyw-V-111-p-C

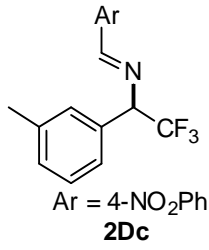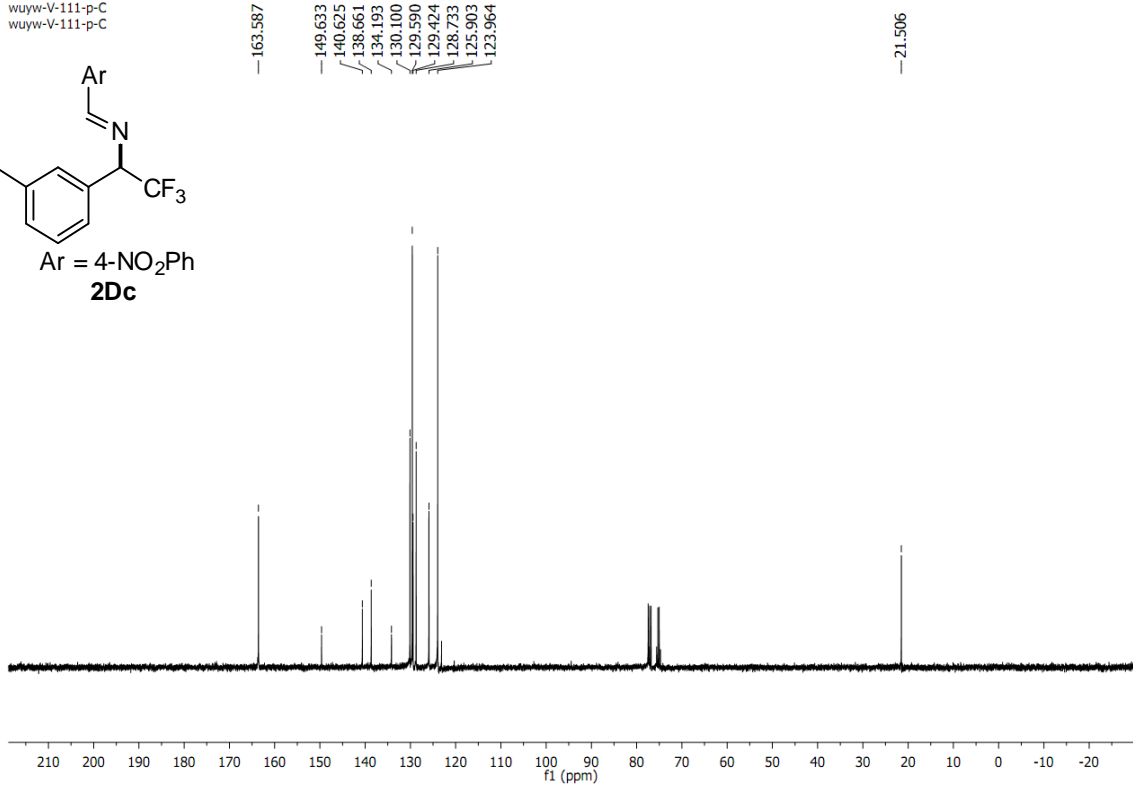

wuyw-V-111-p-F  
wuyw-V-111-p-F

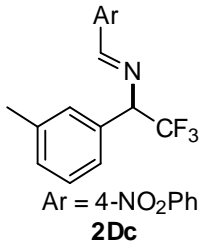

-74.108  
-74.127

A(d)  
-74.12

0 -10 -20 -30 -40 -50 -60 -70 -80 -90 -100 -110 -120 -130 -140 -150 -160 -170 -180 -190 -200 -210  
f1 (ppm)

Data File C:\CHEM32\1\DATA\WUYW\WUYW-VI-19-RAC-1.D  
Sample Name: WUYW-VI-19-RAC

-----  
Acq. Operator : wuyw Location : Vial 21  
Acq. Instrument : Instrument 1  
Injection Date : 5/1/2012 11:11:52 AM Inj Volume : 8 µl  
Acq. Method : C:\CHEM32\1\METHODS\METHOD1.M  
Last changed : 5/1/2012 10:46:45 AM by wuyw  
(modified after loading)  
Analysis Method : C:\CHEM32\1\METHODS\METHOD1.M  
Last changed : 5/1/2012 6:00:10 PM by wuyw  
(modified after loading)  
Sample Info : O3-H, Hex/IPA=80/20, 1.0 mL/min, 254nm, left, 25C, 55ba  
r

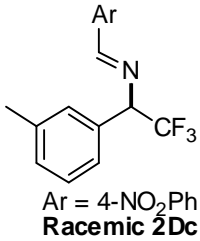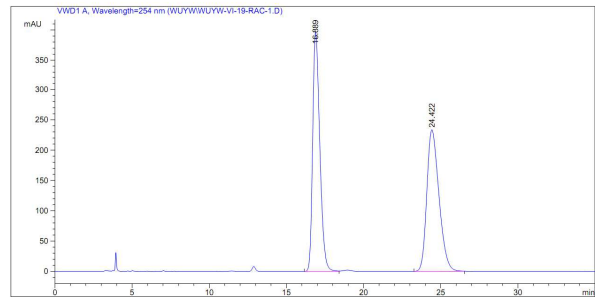

-----  
Area Percent Report  
-----  
Sorted By : Signal  
Multiplier : 1.0000  
Dilution : 1.0000  
Sample Amount : 5.00000 [ng/ul] (not used in calc.)  
Use Multiplier & Dilution Factor with ISTDs  
-----  
Signal 1: VWD1 A, Wavelength=254 nm  
-----  
Peak RetTime Type Width Area Height Area  
# [min] [min] mAU \*s [mAU] %  
-----  
1 16.839 BB 0.4888 1.26769e4 397.21793 49.8582  
2 24.422 BB 0.8424 1.27490e4 233.46429 50.1418  
-----  
Totals : 2.54258e4 630.68222  
-----  
\*\*\* End of Report \*\*\*

Instrument 1 5/1/2012 10:14:59 PM wuyw

Page 1 of 1

Data File C:\Chem32\1\DATA\MUVW\WUYW-VI-19-2-SEP-1.D  
 Sample Name: wuyw-VI-19-2-sep

-----  
 Acq. Operator : wuyw Seq. Line : 1  
 Acq. Instrument : Instrument 1 Location : Vial 21  
 Injection Date : 2/23/2012 10:26:49 PM Inj : 1  
 Inj Volume : 8 µl  
 Sequence File : C:\CHEM32\1\SEQUENCE\DEF.IC.S  
 Method : C:\CHEM32\1\METHODS\METHOD1.M  
 Last changed : 2/23/2012 10:24:18 PM by wuyw  
 Sample Info : OJ-H, Hex/IPA=80:20, 1.0ml/min, 254nm, 54bar, left  
 -----

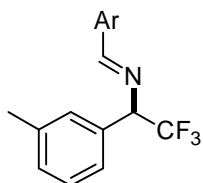

Ar = 4-NO<sub>2</sub>Ph  
**(R)-2Dc, 90% ee from  
 10 mol% DHQ-7f  
 catalyzed reaction.**

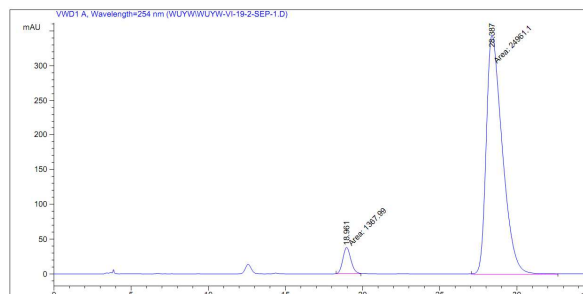

-----  
 Area Percent Report  
 -----

Sorted By : Signal  
 Multiplier : 1.0000  
 Dilution : 1.0000  
 Use Multiplier & Dilution Factor with ISTDs

Signal 1: VWD1 A, Wavelength=254 nm

| Peak # | RetTime [min] | Type | Width [min] | Area [mAU * s] | Height [mAU] | Area %  |
|--------|---------------|------|-------------|----------------|--------------|---------|
| 1      | 18.961        | MM   | 0.6045      | 1367.99487     | 37.71764     | 5.1957  |
| 2      | 28.387        | MM   | 1.2070      | 2.49611e4      | 344.67096    | 94.8043 |

Totals : 2.63291e4 382.38860

-----  
 \*\*\* End of Report \*\*\*  
 -----

Instrument 1 2/24/2012 9:40:33 AM wuyw

Page 1 of 1

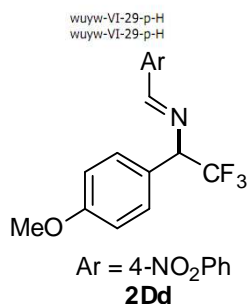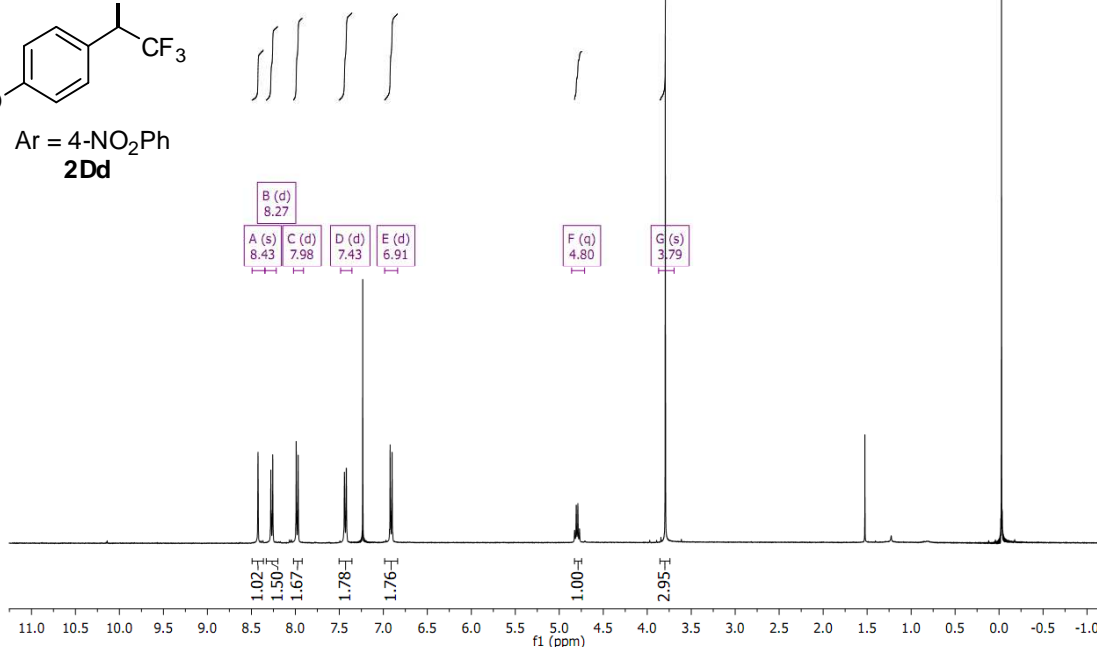

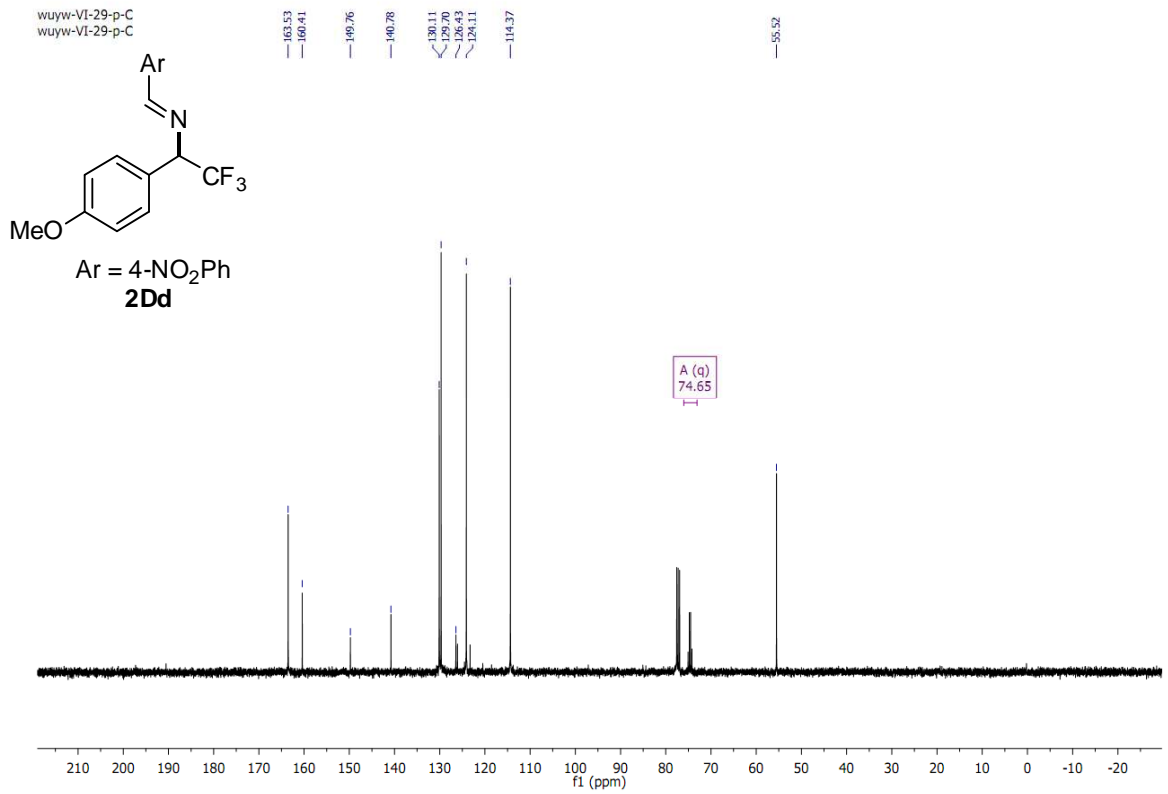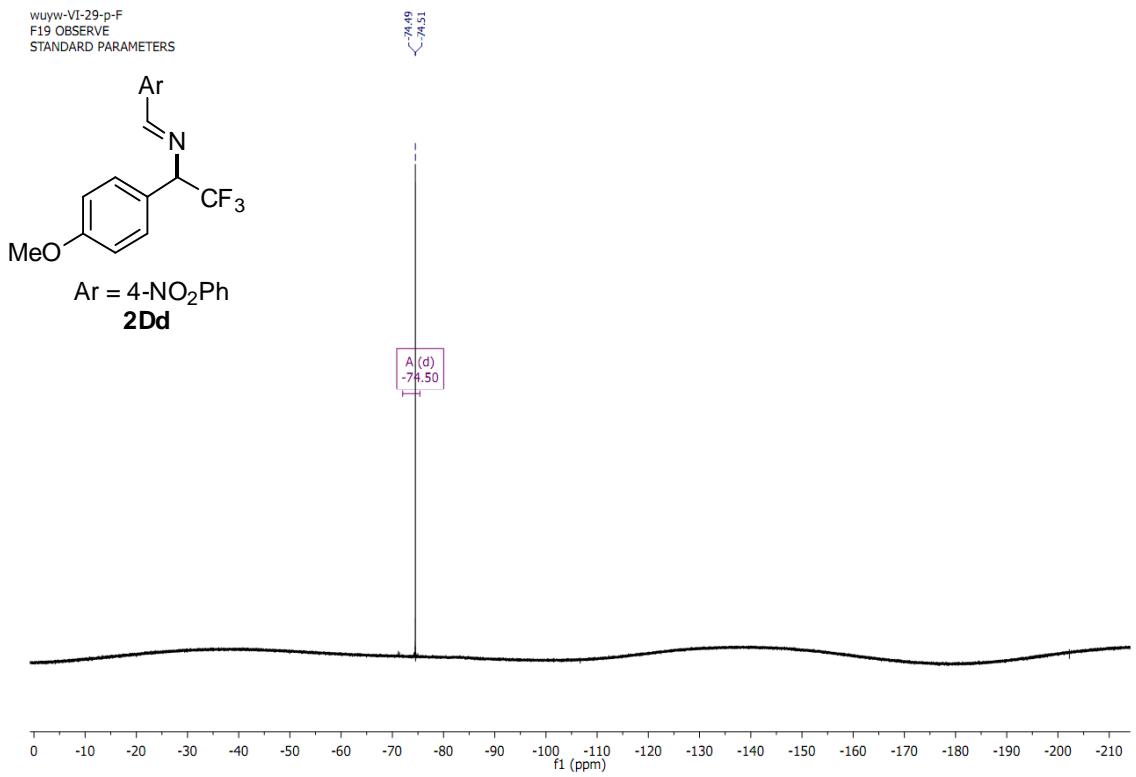

Data File C:\CHEM32\1\DATA\WUYW\WUYW-VI-22-3-2.D  
Sample Name: wuyw-VI-22-3

-----  
Acq. Operator : wuyw Seq. Line : 1  
Acq. Instrument : Instrument 1 Location : Vial 21  
Injection Date : 1/9/2012 5:58:10 PM Inj : 1  
Inj Volume : 5 µl  
Acq. Method : C:\CHEM32\1\METHODS\METHOD1.M  
Last changed : 1/9/2012 5:55:50 PM by wuyw  
Analysis Method : C:\CHEM32\1\METHODS\METHOD1.M  
Last changed : 5/1/2012 1:49:44 PM by DAVID  
(modified after loading)  
Sample Info : AD, Hex/IPA=80/20, 1.0 mL/min, 254nm, 25C, left, 28bar

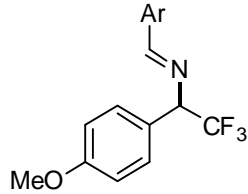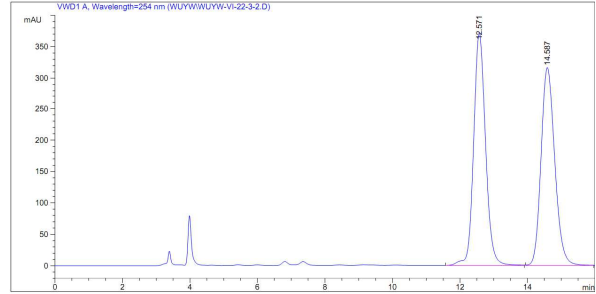

-----  
Area Percent Report  
-----  
Sorted By : Signal  
Multiplier : 1.0000  
Dilution : 1.0000  
Use Multiplier & Dilution Factor with ISTDs

Signal 1: VWD1 A, Wavelength=254 nm

| Peak # | RetTime [min] | Type | Width [min] | Area [mAU*s] | Height [mAU] | Area %  |
|--------|---------------|------|-------------|--------------|--------------|---------|
| 1      | 12.571        | BB   | 0.3779      | 9106.03809   | 371.25906    | 50.5790 |
| 2      | 14.587        | BB   | 0.4342      | 8897.56543   | 316.54193    | 49.4210 |

Totals : 1.80036e4 687.80099

-----  
\*\*\* End of Report \*\*\*

Instrument 1 5/1/2012 1:50:07 PM DAVID

Page 1 of 1

Data File C:\Chem32\1\DATA\X23\WUYW-VI-31-SEP-1.D  
Sample Name: wuyw-VI-31-sep

-----  
Acq. Operator : wuyw  
Acq. Instrument : Instrument 1 Location : Vial 21  
Injection Date : 1/19/2012 7:34:00 PM Inj Volume : 5 µl  
Acq. Method : C:\CHEM32\1\METHODS\METHOD1.M  
Last changed : 1/19/2012 7:28:19 PM by wuyw  
(modified after loading)  
Analysis Method : C:\CHEM32\1\METHODS\METHOD1.M  
Last changed : 1/19/2012 7:52:54 PM by wuyw  
(modified after loading)  
Sample Info : AD, Hex/IPA = 80/20, 1.0 mL/min, 254 nm, 28 bar, Left

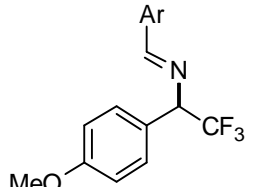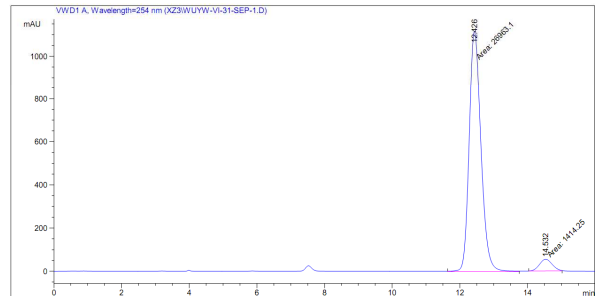

-----  
Area Percent Report  
-----  
Sorted By : Signal  
Multiplier : 1.0000  
Dilution : 1.0000  
Sample Amount : 1.00000 [ng/µl] (not used in calc.)  
Use Multiplier & Dilution Factor with ISTDs

Signal 1: VWD1 A, Wavelength=254 nm

| Peak # | RetTime [min] | Type | Width [min] | Area [mAU*s] | Height [mAU] | Area %  |
|--------|---------------|------|-------------|--------------|--------------|---------|
| 1      | 12.426        | NM   | 0.4023      | 2.69631e4    | 1117.13525   | 95.0163 |
| 2      | 14.532        | NM   | 0.4352      | 1414.24915   | 54.16494     | 4.9837  |

Totals : 2.83773e4 1171.30020

-----  
\*\*\* End of Report \*\*\*

Int: Created with novaPDF Printer ([www.novapdf.com](http://www.novapdf.com)). Please register to remove this message.

Page 1 of 1

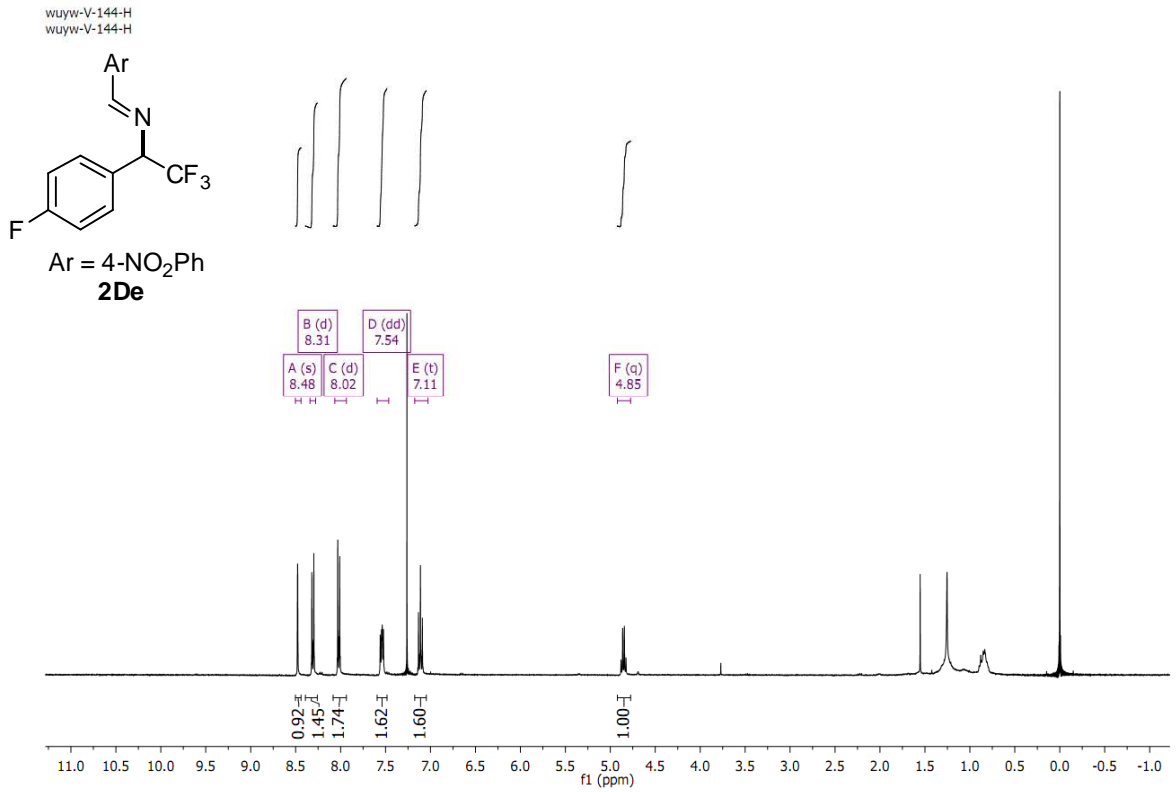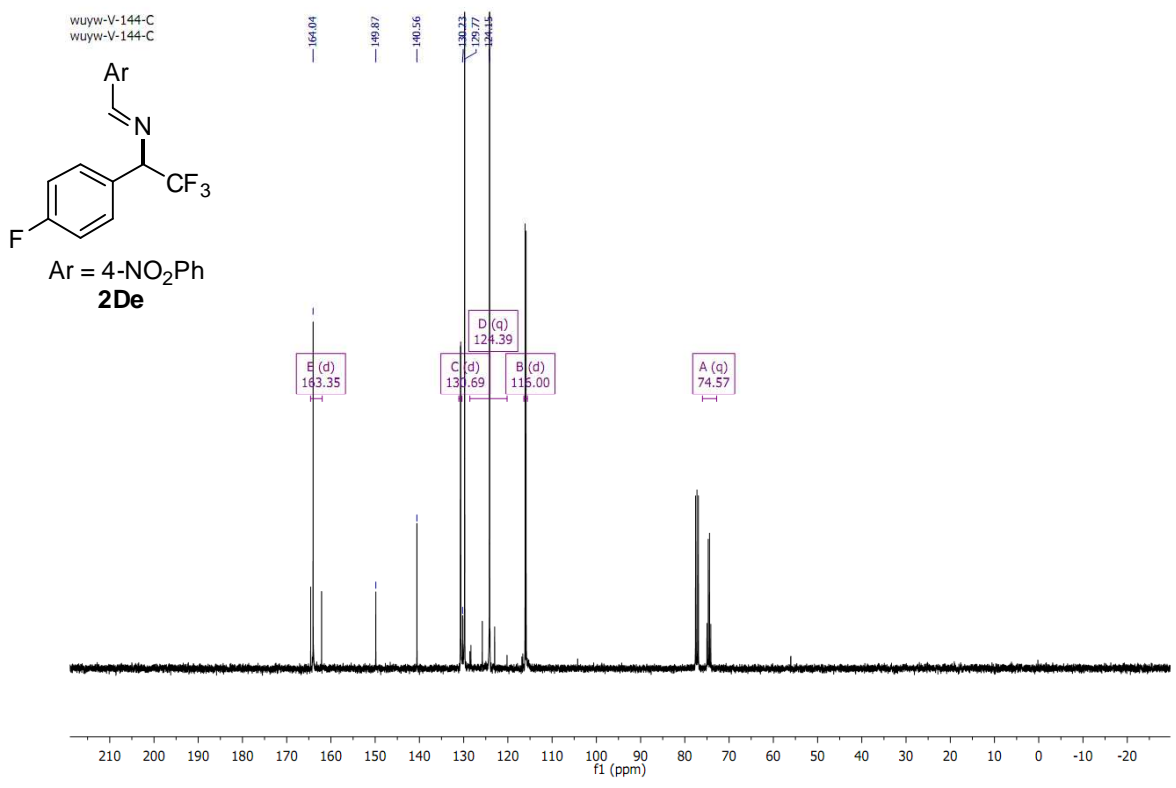



wuyw-V-144-F  
F19 OBSERVE  
STANDARD PARAMETERS

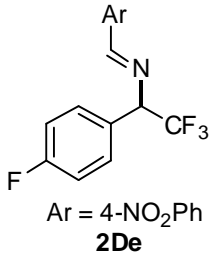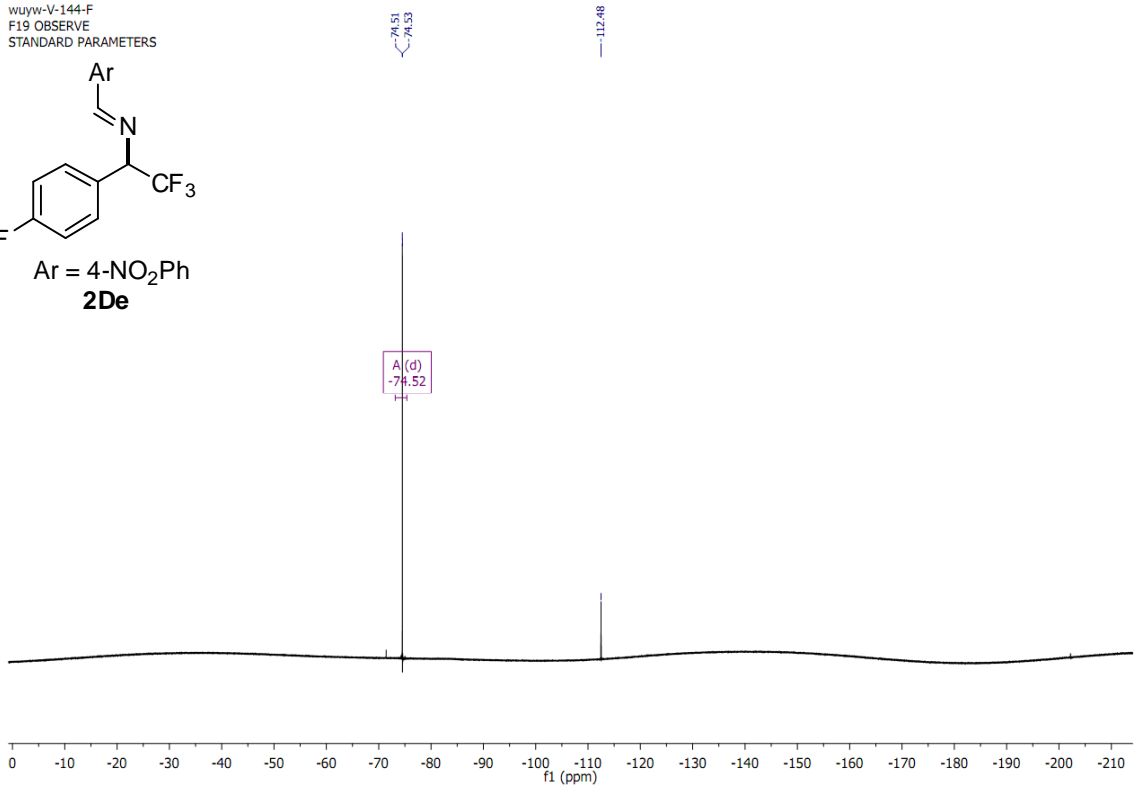

Data File C:\CHEM32\1\DATA\WUYW\WUYW-IV-91-RAC-1.D  
Sample Name: wuyw-IV-91-rac

```
-----
Acq. Operator   : wuyw                      Seq. Line : 1
Acq. Instrument : Instrument 1              Location  : Vial 21
Injection Date  : 12/22/2010 10:54:12 PM   Inj       : 1
                                           Inj Volume: 10 µl
Acq. Method     : C:\CHEM32\1\METHODS\METHOD1.M
Last changed    : 12/22/2010 10:56:26 PM by wuyw
                                           (modified after loading)
Analysis Method : C:\CHEM32\1\METHODS\METHOD1.M
Last changed    : 5/1/2012 1:53:25 PM by DAVID
                                           (modified after loading)
Sample Info     : O3-H, Hex:IPA = 70:30, 254nm, 1.0 mL/min, 67 bar, Left
-----
```

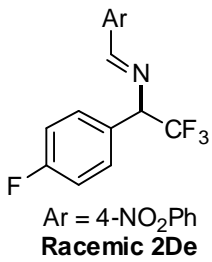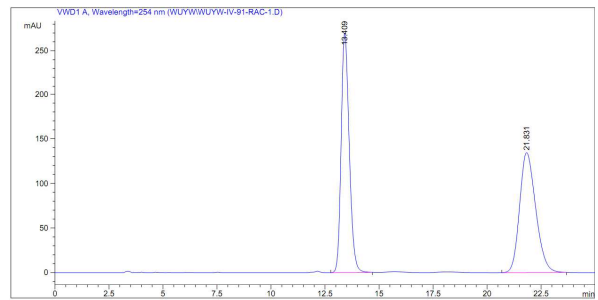

Area Percent Report

```
-----
Sorted By      : Signal
Multiplier     : 1.0000
Dilution       : 1.0000
Use Multiplier & Dilution Factor with ISTDs

Signal 1: VWD1 A, Wavelength=254 nm
-----
```

| Peak #   | RetTime [min] | Type | Width [min] | Area [mAU*s] | Height [mAU] | Area %  |
|----------|---------------|------|-------------|--------------|--------------|---------|
| 1        | 13.409        | BB   | 0.3959      | 6973.11279   | 270.04990    | 50.0055 |
| 2        | 21.831        | BB   | 0.7993      | 6971.58789   | 134.60960    | 49.9945 |
| Totals : |               |      |             | 1.39447e4    | 404.65950    |         |

\*\*\* End of Report \*\*\*

Instrument 1 5/1/2012 1:56:38 PM DAVID

Page 1 of 1

Data File C:\CHEM32\1\DATA\WUYW\WUYW-U-144-2.D  
 Sample Name: wuyw-V-144

-----  
 Acq. Operator : wuyw Seq. Line : 1  
 Acq. Instrument : Instrument 1 Location : Vial 21  
 Injection Date : 11/23/2011 10:24:54 PM Inj : 1  
 Different Inj Volume from Sequence 1 Actual Inj Volume : 8 µl  
 Acq. Method : C:\CHEM32\1\METHODS\METHOD1.M Inj Volume : 6 µl  
 Last changed : 11/23/2011 10:42:34 PM by wuyw  
 (modified after loading)  
 Analysis Method : C:\CHEM32\1\METHODS\METHOD1.M  
 Last changed : 11/23/2011 5:51:02 PM by wuyw  
 Sample Info : OJ-H, Hex/IPA = 70/30, 1.0ml/min, 254nm, 25C, left, 65b  
 az  
 -----

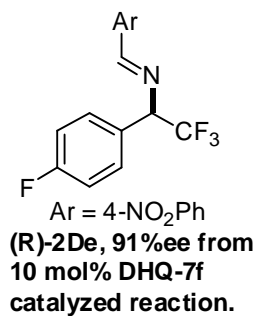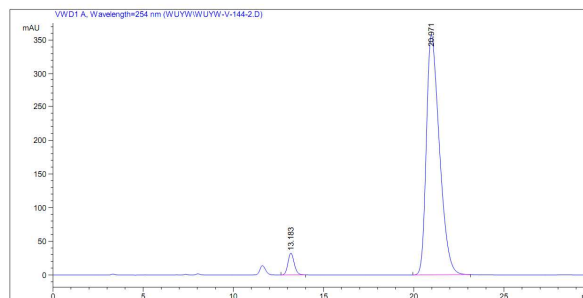

-----  
 Area Percent Report  
 -----  
 Sorted By : Signal  
 Multiplier : 1.0000  
 Dilution : 1.0000  
 Use Multiplier & Dilution Factor with ISTDs

Signal 1: WVD1 A, Wavelength=254 nm

| Peak #   | RetTime [min] | Type | Width [min] | Area [mAU*s] | Height [mAU] | Area %  |
|----------|---------------|------|-------------|--------------|--------------|---------|
| 1        | 13.183        | BB   | 0.3752      | 793.89240    | 32.50787     | 4.2260  |
| 2        | 20.971        | BB   | 0.7707      | 1.79920e4    | 357.49752    | 95.7740 |
| Totals : |               |      |             | 1.87859e4    | 389.96539    |         |

-----  
 \*\*\* End of Report \*\*\*  
 -----

Int: Created with novaPDF Printer ([www.novapdf.com](http://www.novapdf.com)). Please register to remove this message.

Page 1 of 1

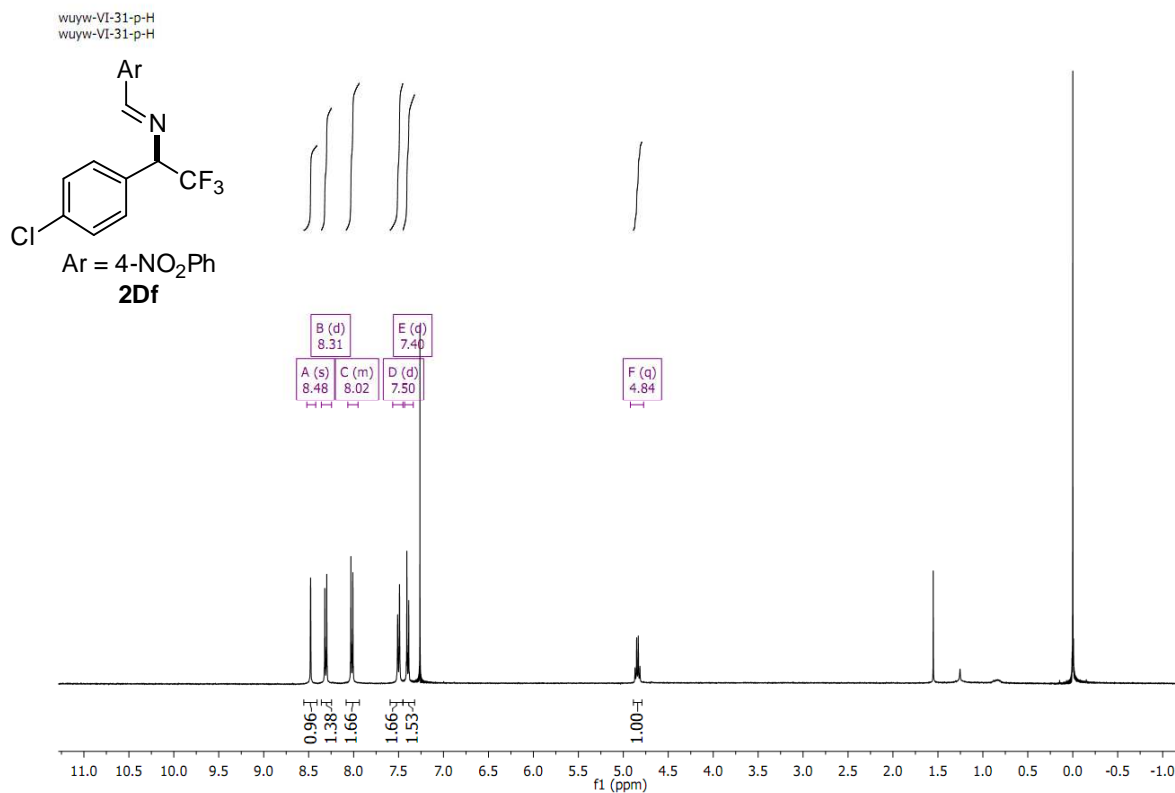

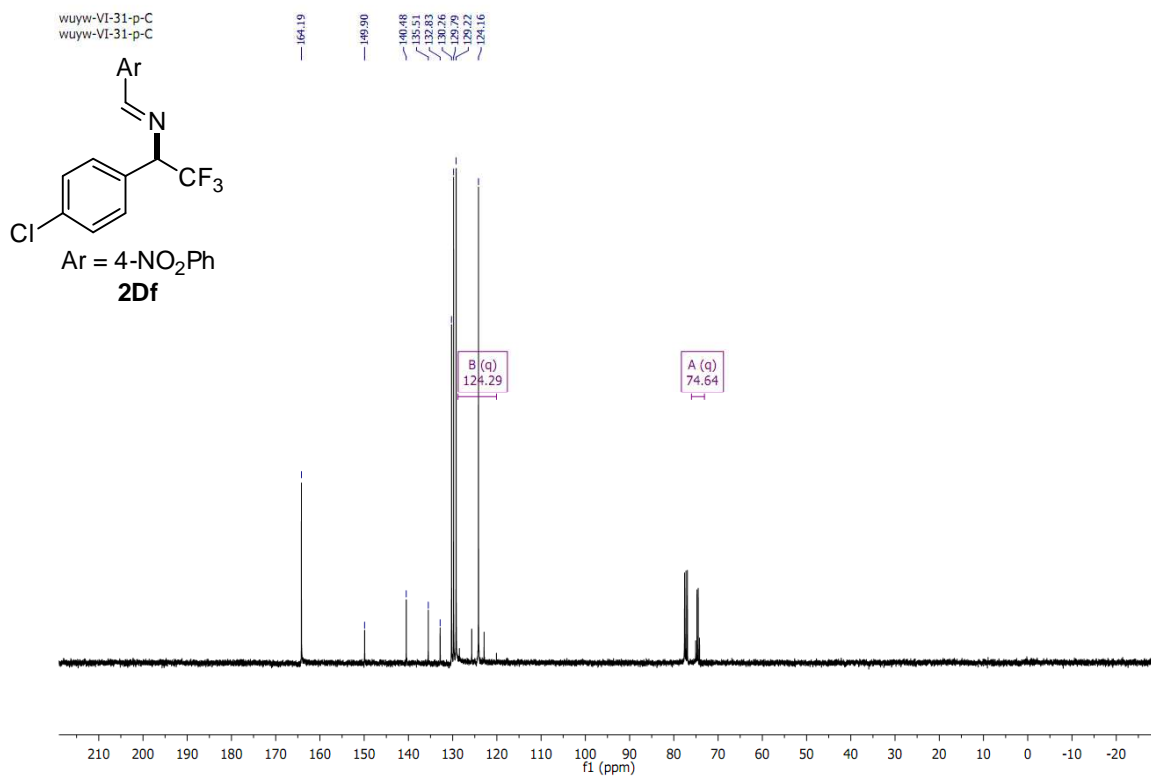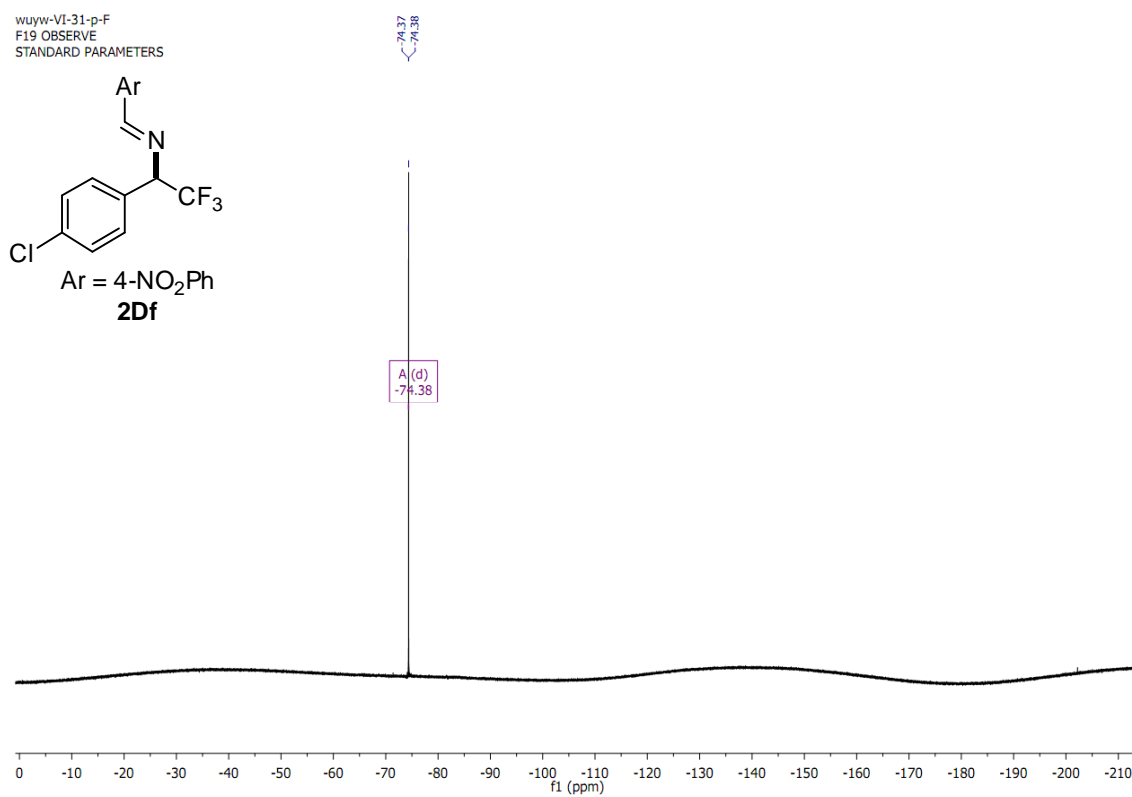

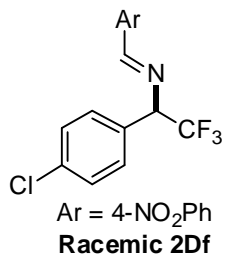

Data File C:\CHEM32\1\DATA\WUYW\WUYW-IV-96-RAC-2.D  
 Sample Name: wuyw-IV-96-rac

```
-----
Acq. Operator   : wuyw                      Seq. Line :    2
Acq. Instrument : Instrument 1                Location  : Vial 22
Injection Date  : 1/8/2012 2:44:07 PM      Inj       :    1
                                           Inj Volume: 10 µl
Acq. Method    : C:\CHEM32\1\METHODS\METHOD1.M
Last changed   : 1/8/2012 2:34:17 PM by wuyw
                                           (modified after loading)
Analysis Method: C:\CHEM32\1\METHODS\METHOD1.M
Last changed   : 5/1/2012 1:59:48 PM by DAVID
                                           (modified after loading)
Sample Info    : OJ-H, Hex:IPA = 80:20, 254nm, 1.0 mL/min, 56 bar, Left
-----
```

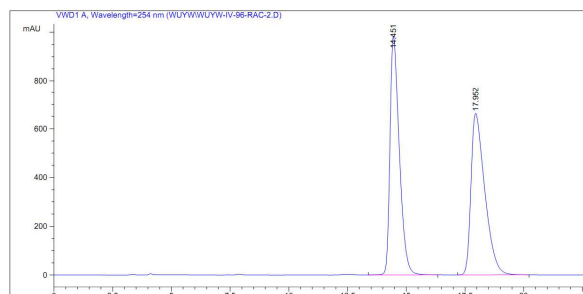

-----  
 Area Percent Report  
 -----

Sorted By : Signal  
 Multiplier : 1.0000  
 Dilution : 1.0000  
 Use Multiplier & Dilution Factor with ISTDs

Signal 1: VWD1 A, Wavelength=254 nm

| Peak #   | RetTime [min] | Type | Width [min] | Area [mAU * s] | Height [mAU] | Area %  |
|----------|---------------|------|-------------|----------------|--------------|---------|
| 1        | 14.451        | BB   | 0.4154      | 2.70673e4      | 984.37512    | 49.9789 |
| 2        | 17.952        | BB   | 0.6152      | 2.70901e4      | 662.74390    | 50.0211 |
| Totals : |               |      |             | 5.41574e4      | 1647.11902   |         |

-----  
 \*\*\* End of Report \*\*\*

Instrument 1 5/1/2012 2:04:43 PM DAVID Page 1 of 1  
 Data File C:\CHEM32\1\DATA\WUYW\WUYW-VI-31-3D-SEP-1.D  
 Sample Name: wuyw-VI-31-3D-SEP

```
-----
Acq. Operator   : wuyw                      Seq. Line :    1
Acq. Instrument : Instrument 1                Location  : Vial 21
Injection Date  : 1/23/2012 10:50:48 AM      Inj       :    1
                                           Inj Volume: 3 µl
Acq. Method    : C:\CHEM32\1\METHODS\METHOD1.M
Last changed   : 1/21/2012 5:28:07 PM by wuyw
Analysis Method: C:\CHEM32\1\METHODS\METHOD1.M
Last changed   : 5/1/2012 1:59:48 PM by DAVID
                                           (modified after loading)
Sample Info    : OJ-H, Hex:IPA=80/20, 1.0mL/min, 254nm, left, 25C, 54bar
-----
```

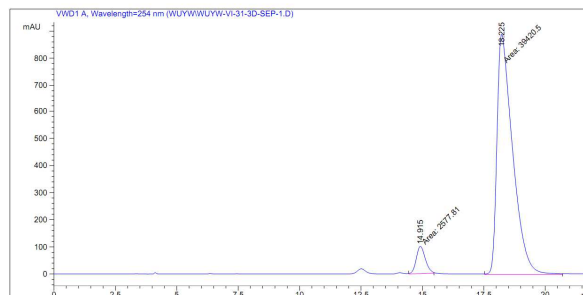

-----  
 Area Percent Report  
 -----

Sorted By : Signal  
 Multiplier : 1.0000  
 Dilution : 1.0000  
 Use Multiplier & Dilution Factor with ISTDs

Signal 1: VWD1 A, Wavelength=254 nm

| Peak #   | RetTime [min] | Type | Width [min] | Area [mAU * s] | Height [mAU] | Area %  |
|----------|---------------|------|-------------|----------------|--------------|---------|
| 1        | 14.915        | MM   | 0.4262      | 2577.81006     | 100.79835    | 6.1379  |
| 2        | 18.225        | MM   | 0.7379      | 3.94205e4      | 890.39227    | 93.8621 |
| Totals : |               |      |             | 4.19983e4      | 991.19062    |         |

-----  
 \*\*\* End of Report \*\*\*

Instrument 1 5/1/2012 2:01:59 PM DAVID Page 1 of 1

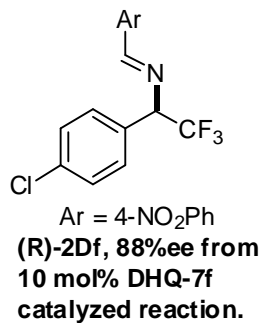

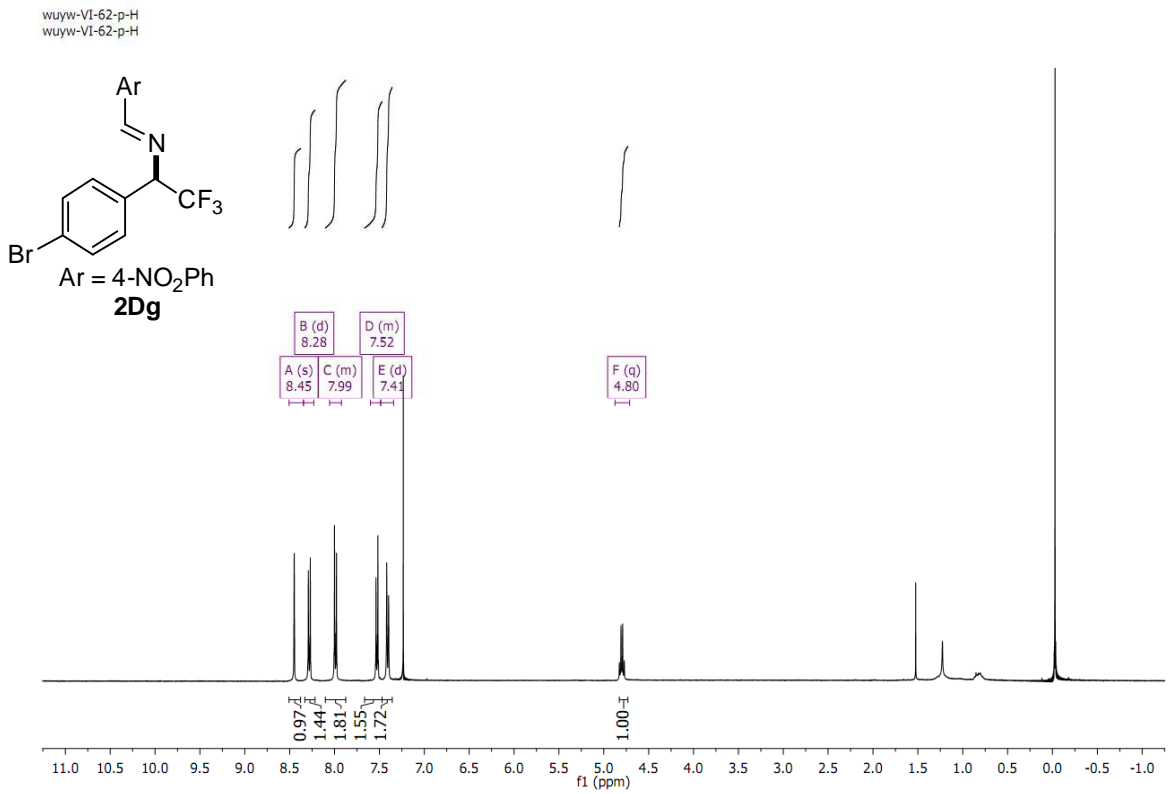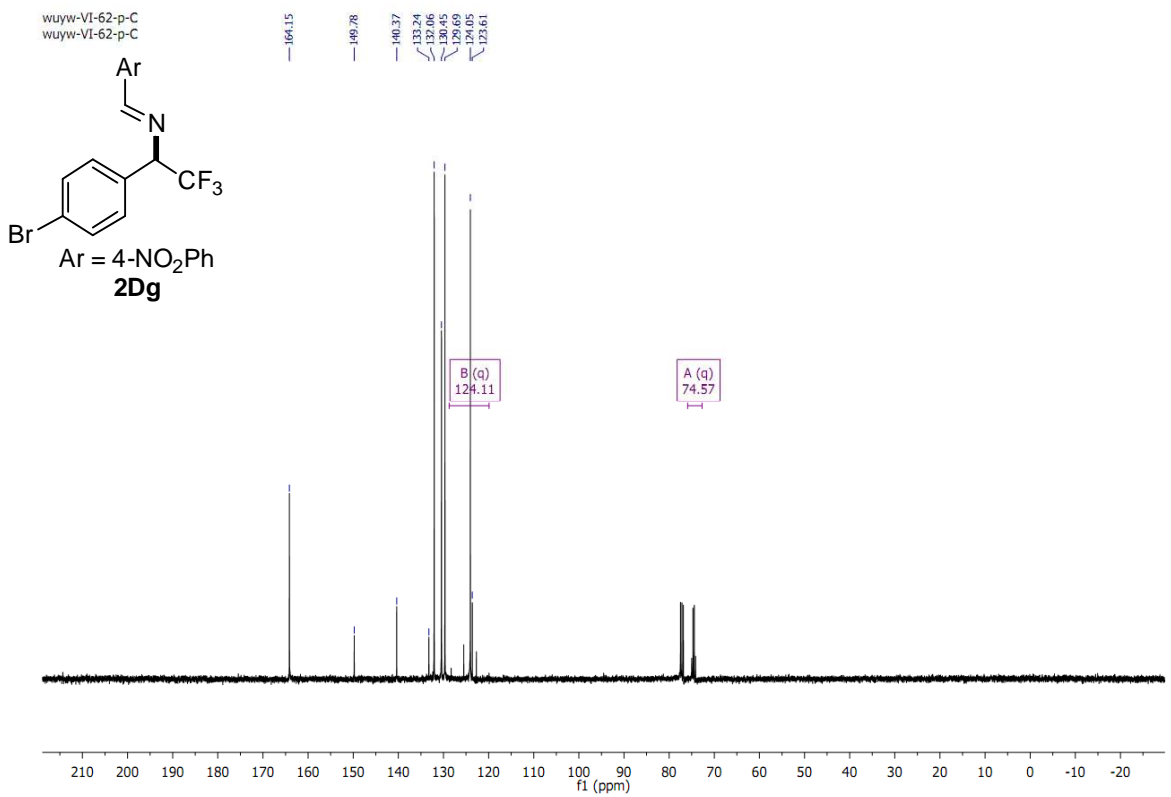

wuyw-VI-62-p-F  
F19 OBSERVE  
STANDARD PARAMETERS

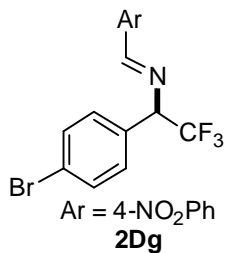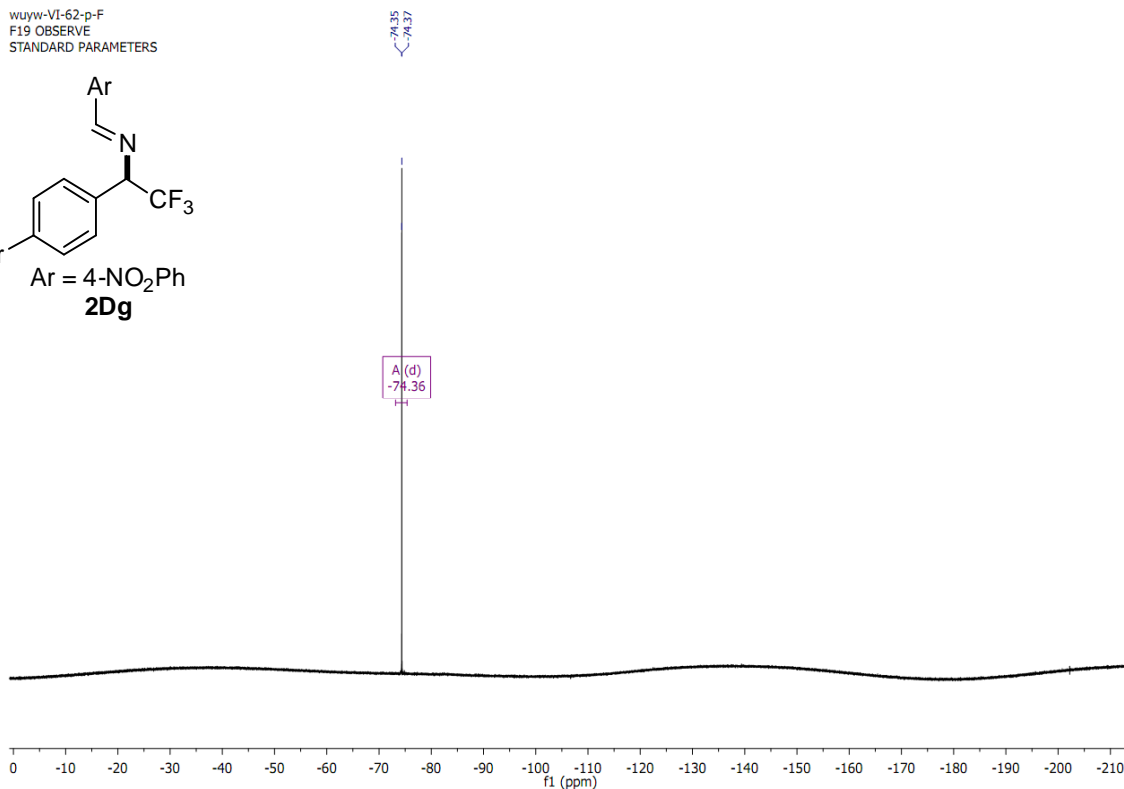

Data File C:\CHEM32\1\DATA\WUYW\WUYW-IV-114-RAC-2.D  
Sample Name: wuyw-IV-114-rac

```

=====
Acq. Operator   : wuyw
Acq. Instrument : Instrument 1          Location : Vial 21
Injection Date  : 2/8/2011 12:01:08 PM  Inj Volume : 5 µl
Acq. Method    : C:\CHEM32\1\METHODS\METHOD1.M
Last changed   : 2/8/2011 11:59:19 AM by wuyw
                (modified after loading)
Analysis Method : C:\CHEM32\1\METHODS\METHOD1.M
Last changed   : 5/1/2012 1:59:48 PM by DAVID
                (modified after loading)
Sample Info    : OJ-H, Hex:IPK=0:20, 1.0 mL/min, 254 nm, Left, 56 bar
=====
  
```

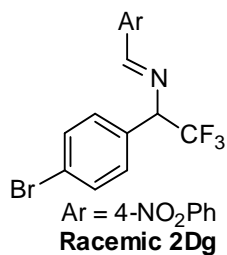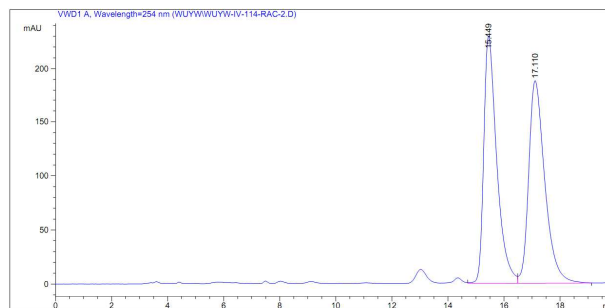

Area Percent Report

```

=====
Sorted By      : Signal
Multiplier    : 1.0000
Dilution      : 1.0000
Use Multiplier & Dilution Factor with ISTDs

Signal 1: VWD1 A, Wavelength=254 nm

Peak RetTime Type Width Area Height Area
# [min] [min] [min] mAU *s [mAU] %
-----|-----|-----|-----|-----|-----
1 15.449 VV 0.4784 7352.54102 229.63155 49.5728
2 17.110 VB 0.6007 7479.27197 188.11191 50.4272
Totals : 1.48318e4 417.74345
=====
*** End of Report ***
  
```

Instrument 1 5/1/2012 2:10:00 PM DAVID

Page 1 of 1



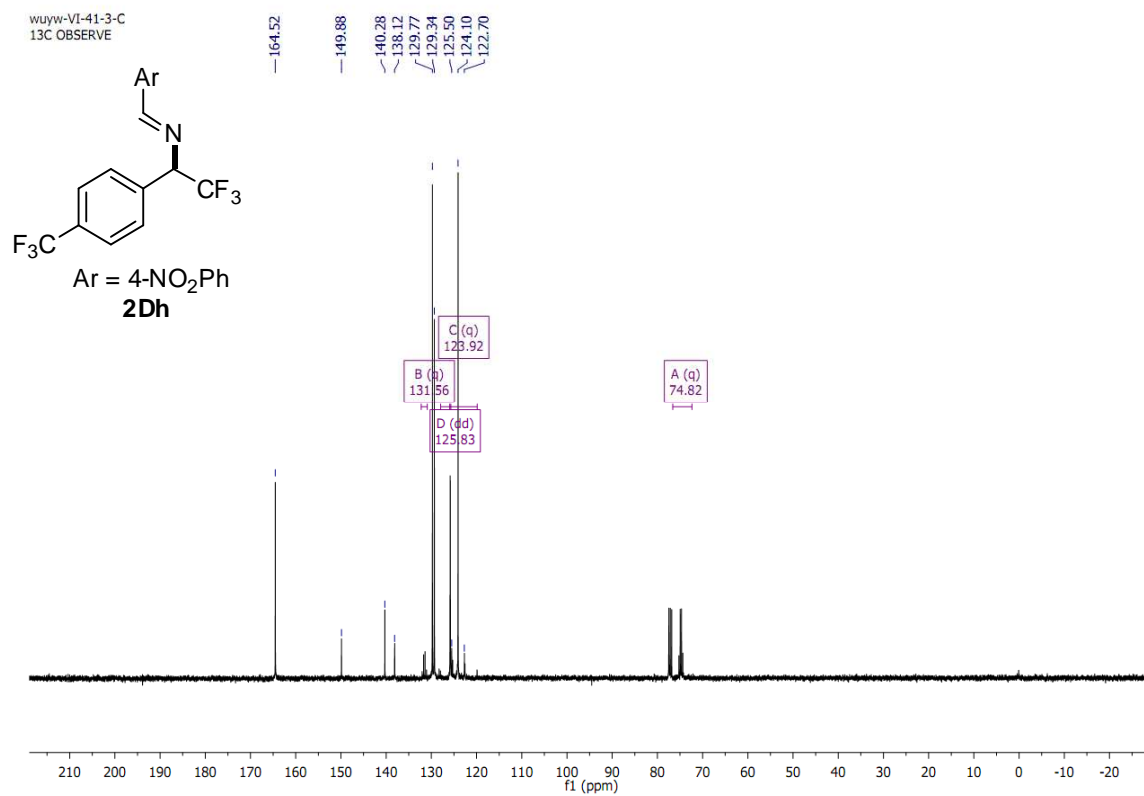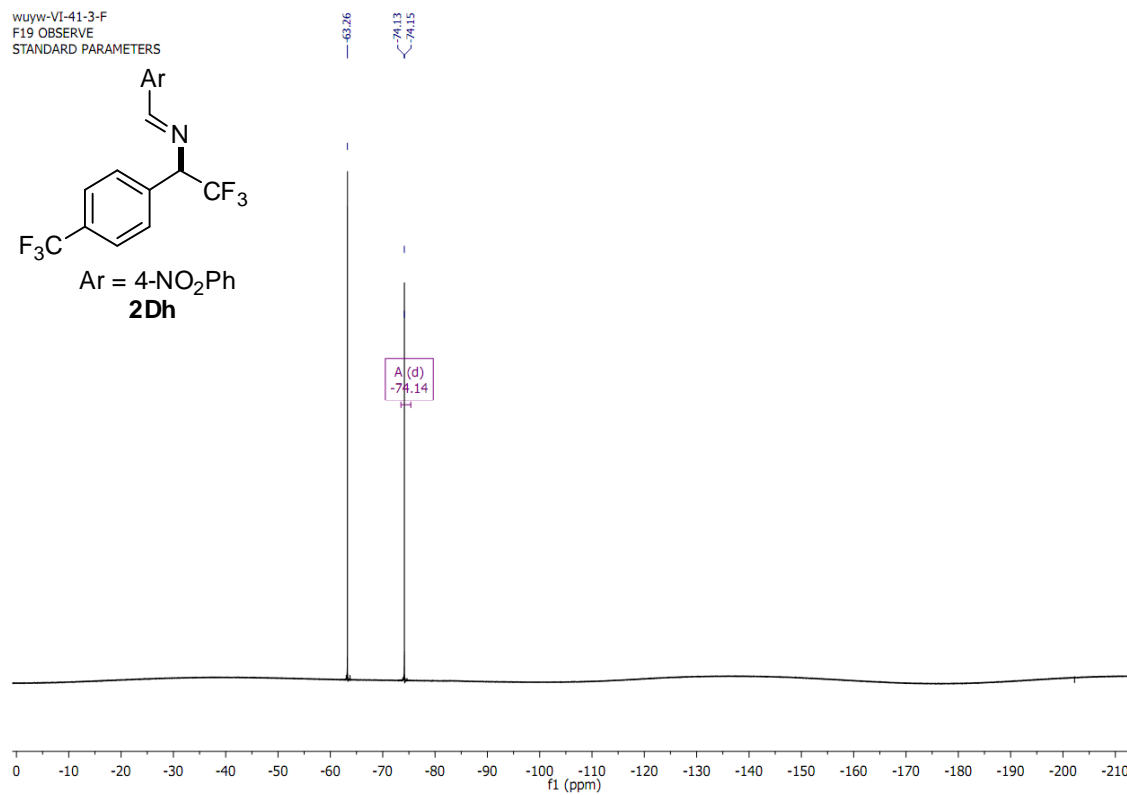



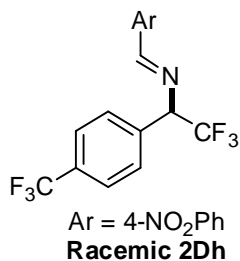

Data File C:\CHEM32\1\DATA\MUVW\MUVW-VI-41-RAC-5.D  
 Sample Name: wuyw-VI-41-rac

```
-----
Acq. Operator   : wuyw
Acq. Instrument : Instrument 1           Location : Vial 21
Injection Date  : 2/9/2012 3:16:09 PM   Inj Volume: 8 µl
Acq. Method    : C:\CHEM32\1\METHODS\METHOD1.M
Last changed   : 2/9/2012 3:13:51 PM by wuyw
                (modified after loading)
Analysis Method: C:\CHEM32\1\METHODS\METHOD1.M
Last changed   : 5/1/2012 3:59:48 PM by DAVID
                (modified after loading)
Sample Info    : AD, Hex/IPA = 90:10, 1.0 mL/min, 254 nm, 27bar, Left
-----
```

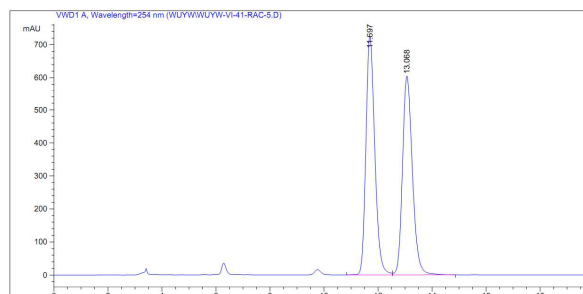

-----  
 Area Percent Report  
 -----

Sorted By : Signal  
 Multiplier : 1.0000  
 Dilution : 1.0000  
 Sample Amount : 1.00000 [ng/ul] (not used in calc.)  
 Use Multiplier & Dilution Factor with ISTDs

Signal 1: VWD1 A, Wavelength=254 nm

| Peak # | RetTime [min] | Type | Width [min] | Area [mAU] | Height [%] | Area [%] |
|--------|---------------|------|-------------|------------|------------|----------|
| 1      | 11.697        | VB   | 0.3502      | 1.65392e4  | 726.20599  | 51.8110  |
| 2      | 13.068        | VB   | 0.3913      | 1.53830e4  | 604.86804  | 46.1890  |

Totals : 3.19221e4 1331.07404

-----  
 \*\*\* End of Report \*\*\*

Instrument 1 5/1/2012 2:13:58 PM DAVID Page 1 of 1  
 Data File C:\Chem32\1\DATA\MUVW\MUVW-VI-41-3-SEP-2.D  
 Sample Name: MUVW-VI-41-3-sep

```
-----
Acq. Operator   : wuyw
Acq. Instrument : Instrument 1           Location : Vial 21
Injection Date  : 2/9/2012 10:15:27 AM   Inj Volume: 5 µl
Method         : C:\CHEM32\1\METHODS\METHOD1.M
Last changed   : 2/9/2012 10:52:03 PM by wuyw
                (modified after loading)
Sample Info    : AD, Hex/IPA=90/10, 1.0mL/min, 254nm, left, 25C, 25bar
-----
```

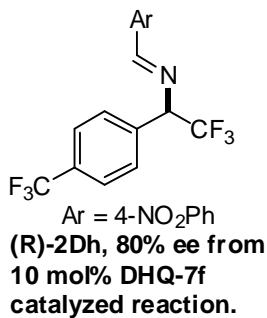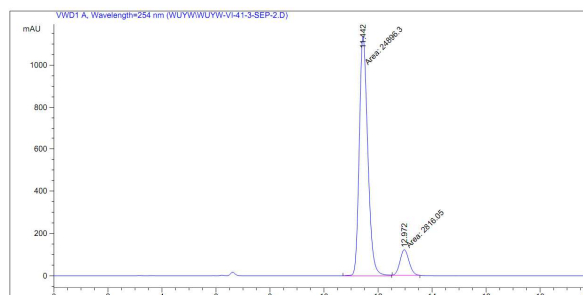

-----  
 Area Percent Report  
 -----

Sorted By : Signal  
 Multiplier : 1.0000  
 Dilution : 1.0000  
 Sample Amount : 5.00000 [ng/ul] (not used in calc.)  
 Use Multiplier & Dilution Factor with ISTDs

Signal 1: VWD1 A, Wavelength=254 nm

| Peak # | RetTime [min] | Type | Width [min] | Area [mAU] | Height [%] | Area [%] |
|--------|---------------|------|-------------|------------|------------|----------|
| 1      | 11.442        | MM   | 0.3646      | 2.48963e4  | 1137.95068 | 89.8383  |
| 2      | 12.972        | MM   | 0.3988      | 2816.05420 | 120.85689  | 10.1617  |

Totals : 2.77124e4 1258.80757

-----  
 \*\*\* End of Report \*\*\*

Int Created with novaPDF Printer ([www.novapdf.com](http://www.novapdf.com)). Please register to remove this message.

Page 1 of 1

wuyw-VI-38-4-H  
wuyw-VI-38-4-H

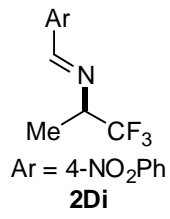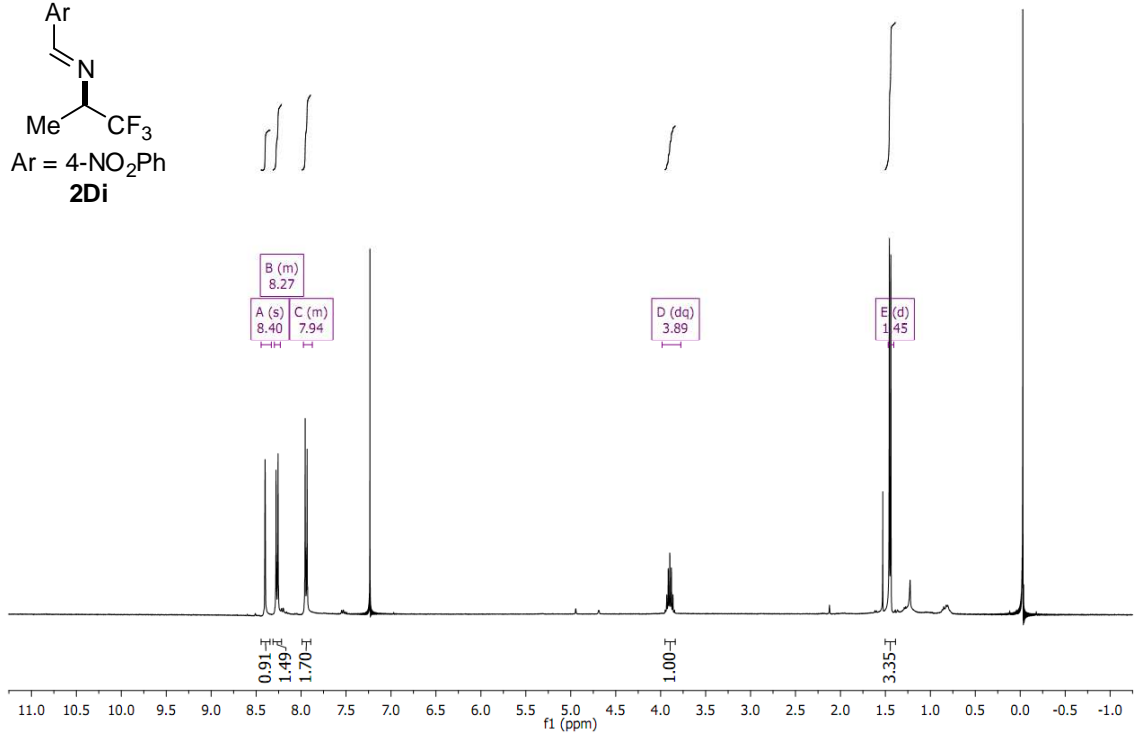

wuyw-VI-38-4-C  
wuyw-VI-38-4-C

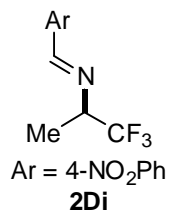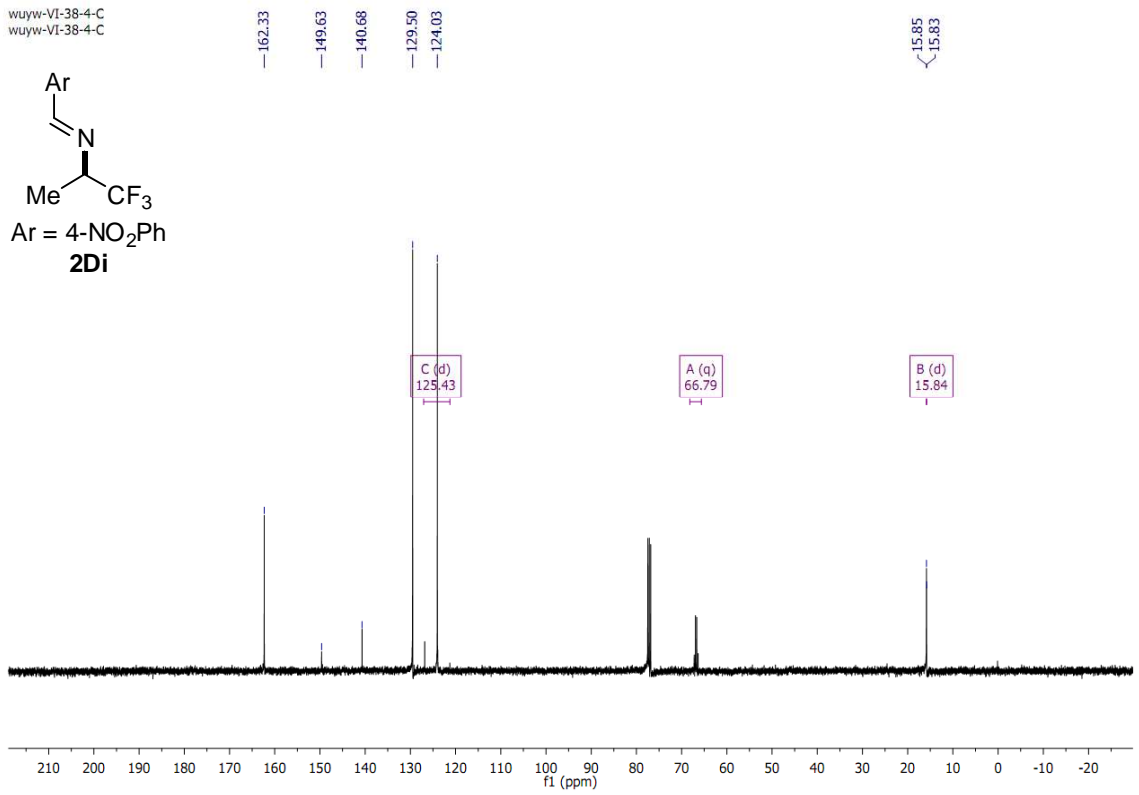

wuyw-VI-38-4-F  
F19 OBSERVE  
STANDARD PARAMETERS

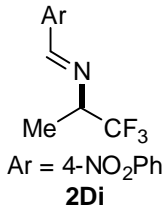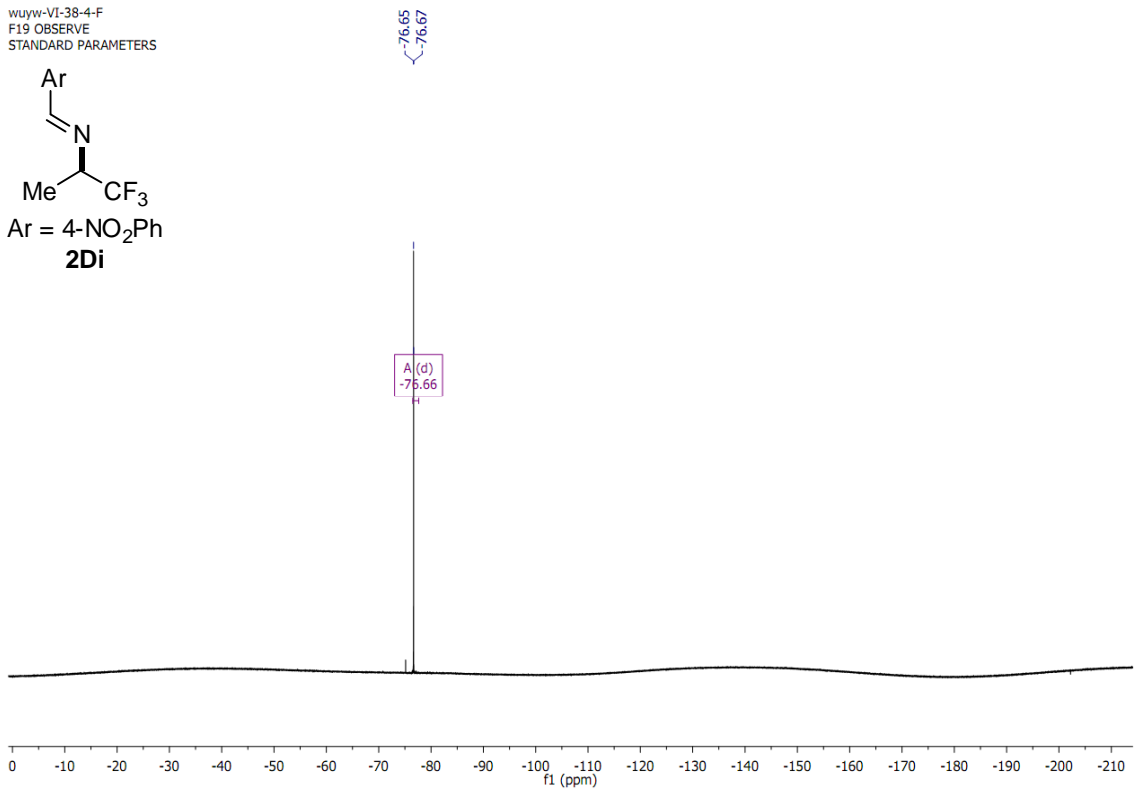

Data File C:\CHEM32\1\DATA\WUYW\WUYW-VI-36-RAC-2.D  
Sample Name: WUYW-VI-36-rac

```
-----
Acq. Operator   : wuyw
Acq. Instrument : Instrument 1
Injection Date  : 1/29/2012 2:33:16 PM
Location       : Vial 41
Inj Volume     : 5 µl
Acq. Method    : C:\CHEM32\1\METHODS\METHOD1.M
Last changed   : 1/29/2012 2:31:02 PM by wuyw
                (modified after loading)
Analysis Method: C:\CHEM32\1\METHODS\METHOD1.M
Last changed   : 5/1/2012 1:59:48 PM by DAVID
                (modified after loading)
Sample Info    : O3-H, Hex/IPA = 97/3, 1.0 mL/min, 254 nm, 25C, 45 bar,
                Left
-----
```

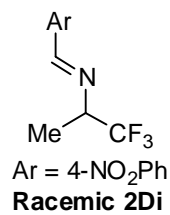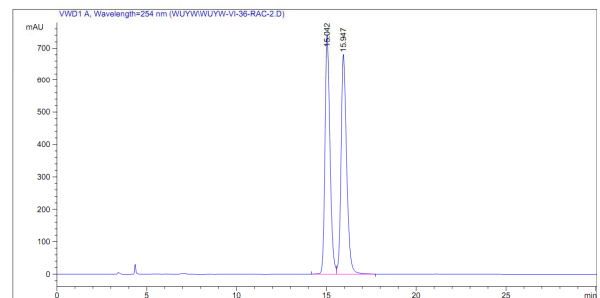

```
-----
Area Percent Report
-----
Sorted By      : Signal
Multiplier     : 1.0000
Dilution       : 1.0000
Sample Amount  : 1.00000 [ng/ul] (not used in calc.)
Use Multiplier & Dilution Factor with ISTDs

Signal 1: VWD1 A, Wavelength=254 nm

Peak RetTime Type Width Area Height Area
# [min] [min] mAU *s [mAU] %
-----
1 15.042 VB 0.2917 1.42307e4 741.89807 49.4448
2 15.947 VB 0.3231 1.46116e4 681.05408 50.5552
Totals : 2.89023e4 1422.95215
-----
*** End of Report ***
```

Instrument 1 5/1/2012 2:23:15 PM DAVID

Page 1 of 1

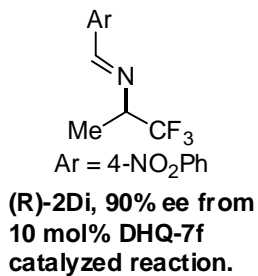

Data File C:\CHEM32\1\DATA\MUYW\MUYW-VI-38-3-SEP-1.D  
 Sample Name: MUYW-VI-38-3-sep

-----  
 Acq. Operator : wuyw  
 Acq. Instrument : Instrument 1 Location : Vial 21  
 Injection Date : 2/8/2012 3:24:03 PM Inj Volume : 5 µl  
 Acq. Method : C:\CHEM32\1\METHODS\METHOD1.M  
 Last changed : 2/8/2012 2:20:11 PM by wuyw  
 (modified after loading)  
 Analysis Method : C:\CHEM32\1\METHODS\METHOD1.M  
 Last changed : 5/1/2012 1:59:48 PM by DAVID  
 (modified after loading)  
 Sample Info : O2-H, Hex/IPA=97/3, 1.0mL/min, 254nm, left, 25C, 44bar

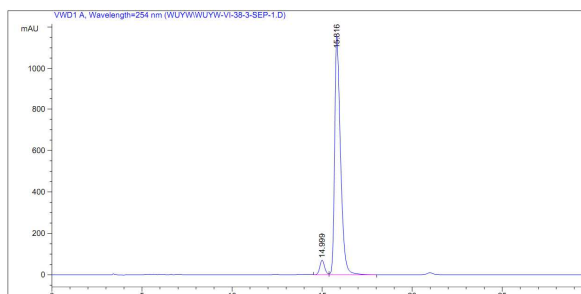

-----  
 Area Percent Report  
 -----

Sorted By : Signal  
 Multiplier : 1.0000  
 Dilution : 1.0000  
 Sample Amount : 5.00000 [ng/ul] (not used in calc.)  
 Use Multiplier & Dilution Factor with ISTDs

Signal 1: VWD1 A, Wavelength=254 nm

| Peak # | RetTime [min] | Type | Width [min] | Area [mAU*s] | Height [mAU] | Area %  |
|--------|---------------|------|-------------|--------------|--------------|---------|
| 1      | 14.999        | BV   | 0.2854      | 1326.43323   | 70.83799     | 4.8434  |
| 2      | 15.816        | VB   | 0.3387      | 2.60602e4    | 1156.42700   | 95.1566 |

Totals : 2.73867e4 1227.26499

-----  
 \*\*\* End of Report \*\*\*

Instrument 1 5/1/2012 2:20:32 PM DAVID

Page 1 of 1

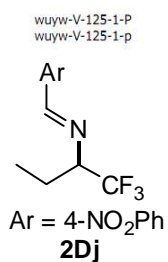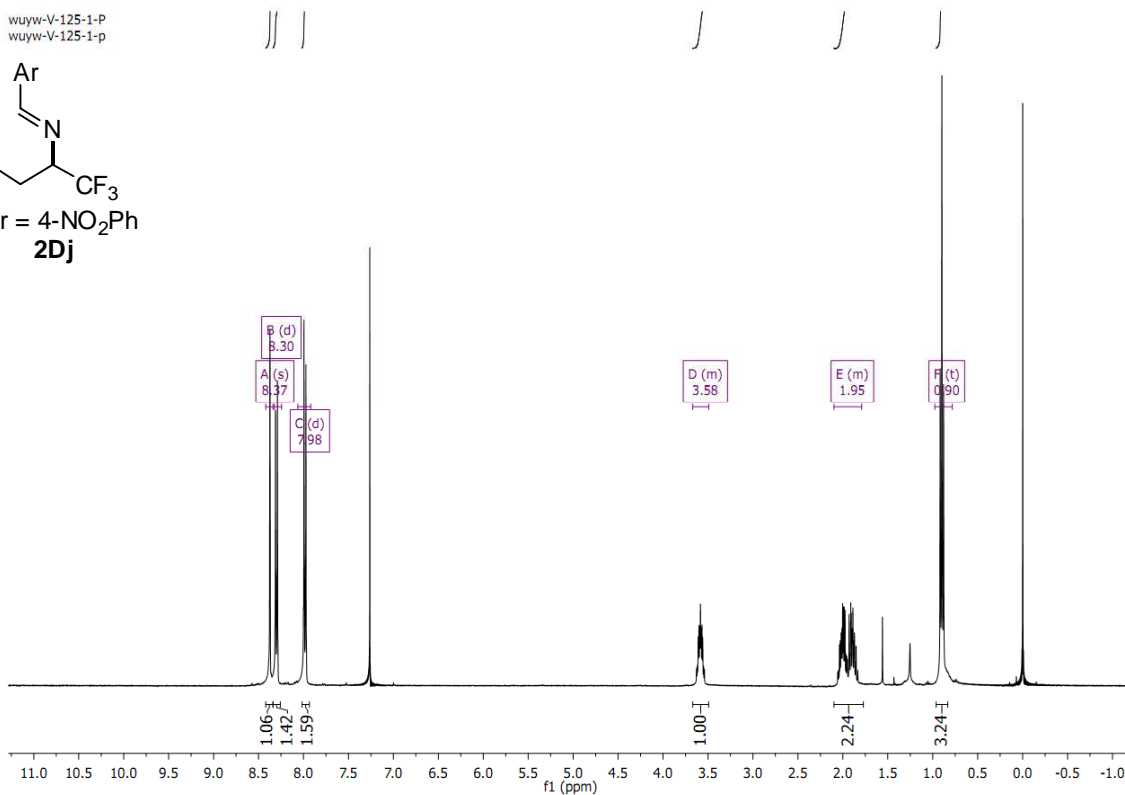

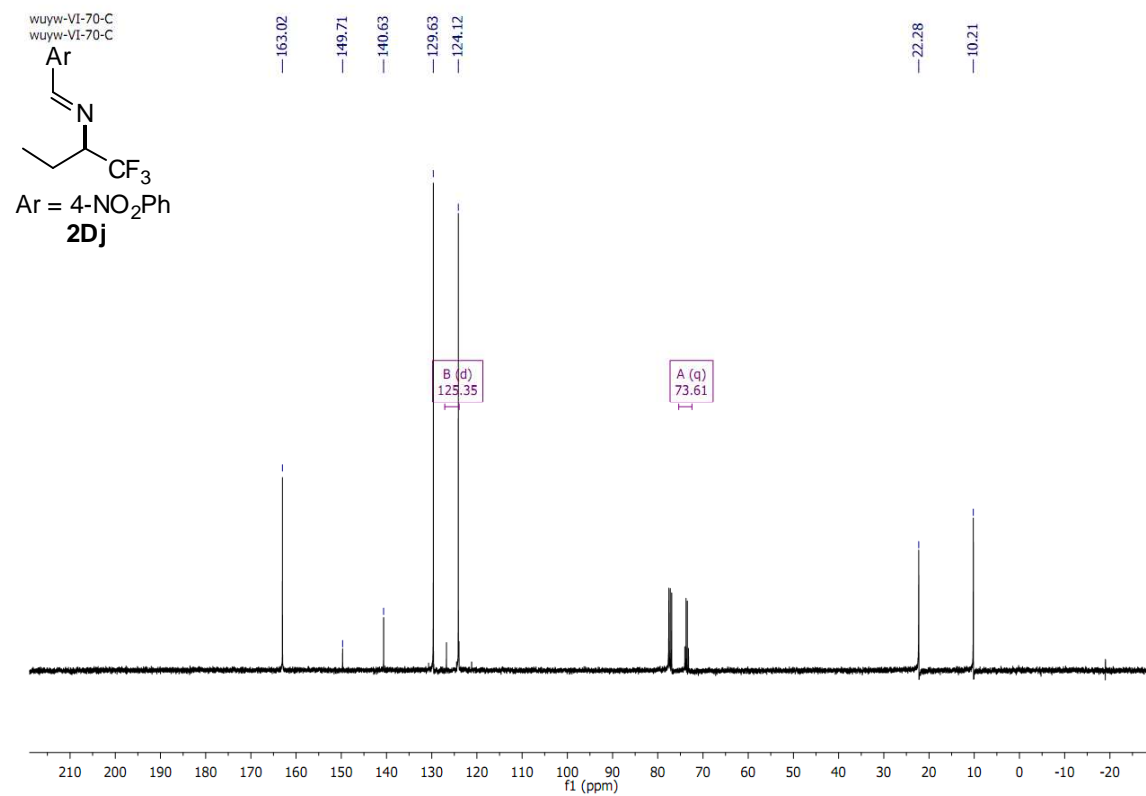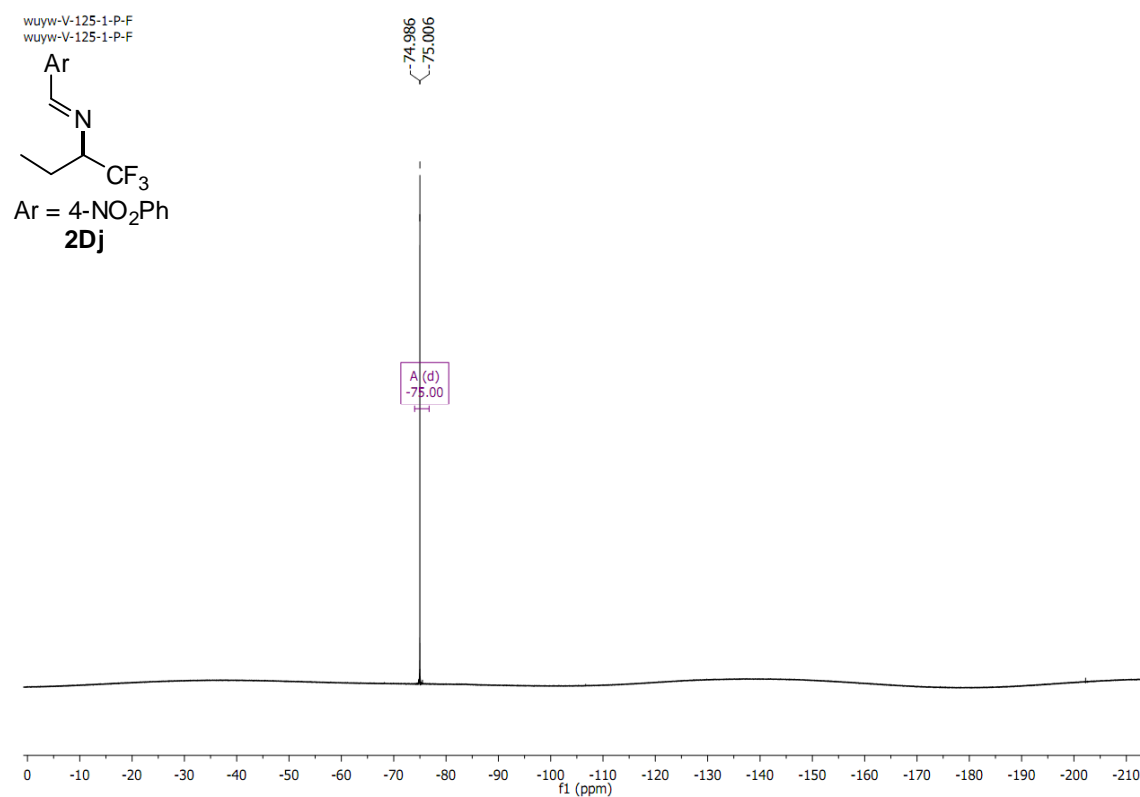

Data File C:\CHEM32\1\DATA\MUYW\WUYW-V-125-1-RAC-1.D  
Sample Name: WUYW-V-125-1-rac

-----  
Acq. Operator : wuyw  
Acq. Instrument : Instrument 1 Location : Vial 21  
Injection Date : 11/1/2011 11:09:12 AM Inj Volume : 3 µl  
Acq. Method : C:\CHEM32\1\METHODS\METHOD1.M  
Last changed : 11/1/2011 10:26:40 AM by wuyw  
(modified after loading)  
Analysis Method : C:\CHEM32\1\METHODS\METHOD1.M  
Last changed : 5/1/2012 1:59:48 PM by DAVID  
(modified after loading)  
Sample Info : AS-H, Hex:IPA = 90:10, 1.0 mL/min, 254 nm, 50 bar, 30C,  
left

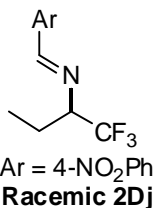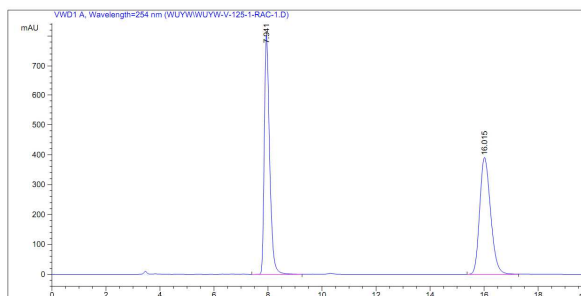

-----  
Area Percent Report  
-----

Sorted By : Signal  
Multiplier : 1.0000  
Dilution : 1.0000  
Sample Amount : 1.00000 [ng/ul] (not used in calc.)  
Use Multiplier & Dilution Factor with ISTDs

Signal 1: WVD1 A, Wavelength=254 nm

| Peak # | RetTime [min] | Type | Width [min] | Area [mAU * s] | Height [mAU] | Area %  |
|--------|---------------|------|-------------|----------------|--------------|---------|
| 1      | 7.941         | VB   | 0.2054      | 1.09212e4      | 802.28192    | 49.8892 |
| 2      | 16.015        | BB   | 0.4369      | 1.09697e4      | 390.53619    | 50.1108 |

Totals : 2.18909e4 1192.81812

Instrument 1 5/1/2012 2:40:32 PM DAVID

Page 1 of 1

Data File C:\Chem32\1\DATA\MUYW\WUYW-VI-70-SEP-3.D  
Sample Name: WUYW-VI-70-sep

-----  
Acq. Operator : wuyw  
Acq. Instrument : Instrument 1 Location : Vial 21  
Injection Date : 5/1/2012 6:34:39 PM Inj Volume : 8 µl  
Method : C:\CHEM32\1\METHODS\METHOD1.M  
Last changed : 5/1/2012 6:00:30 PM by wuyw  
(modified after loading)  
Sample Info : AS-H, Hex:IPA=90/10, 1.0 mL/min, 254nm, left, 30C, 50ba  
r

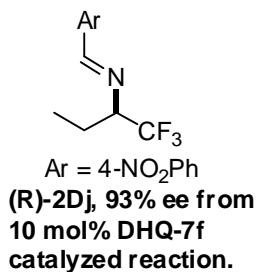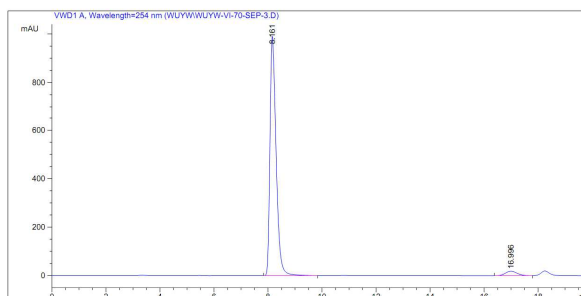

-----  
Area Percent Report  
-----

Sorted By : Signal  
Multiplier : 1.0000  
Dilution : 1.0000  
Sample Amount : 5.00000 [ng/ul] (not used in calc.)  
Use Multiplier & Dilution Factor with ISTDs

Signal 1: WVD1 A, Wavelength=254 nm

| Peak # | RetTime [min] | Type | Width [min] | Area [mAU * s] | Height [mAU] | Area %  |
|--------|---------------|------|-------------|----------------|--------------|---------|
| 1      | 8.161         | BB   | 0.2390      | 1.55981e4      | 990.53473    | 96.5770 |
| 2      | 16.898        | BB   | 0.4610      | 532.84106      | 18.48866     | 3.4230  |

Totals : 1.61509e4 1009.02339

\*\*\* End of Report \*\*\*

Instrument 1 5/1/2012 8:51:06 PM wuyw

Page 1 of 1

wuyw-VI-44-2-H  
wuyw-VI-44-2-H

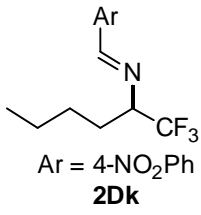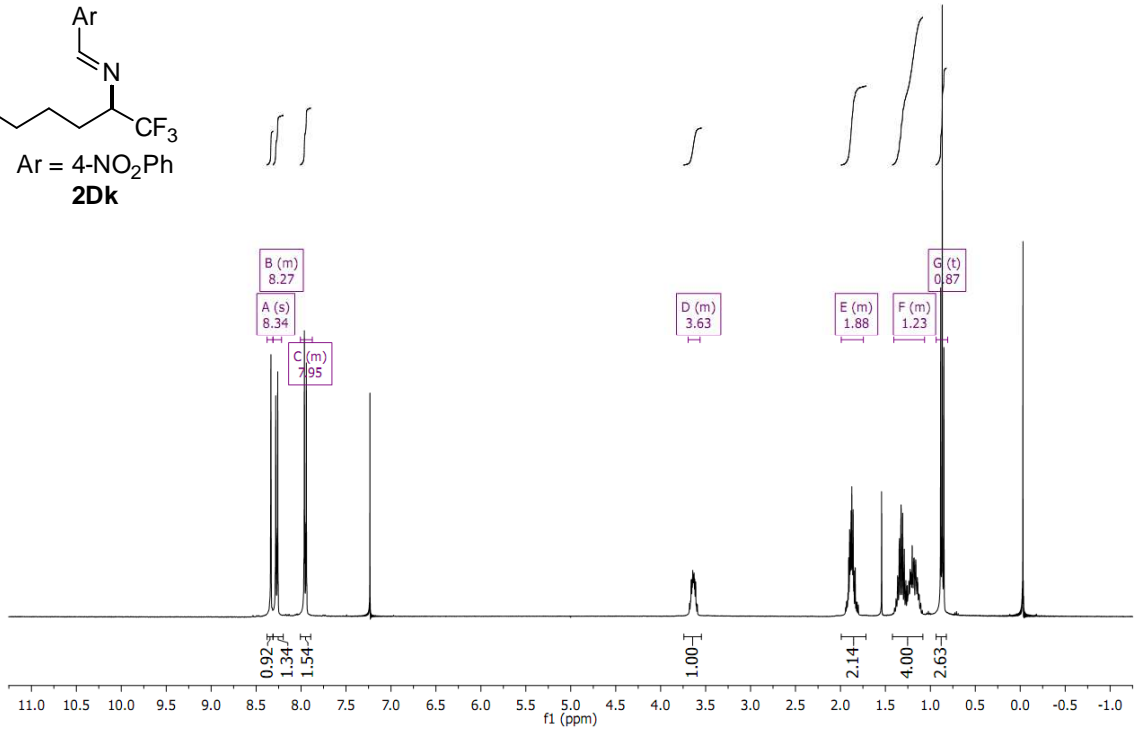

wuyw-VI-44-2-C  
13C OBSERVE

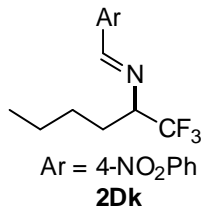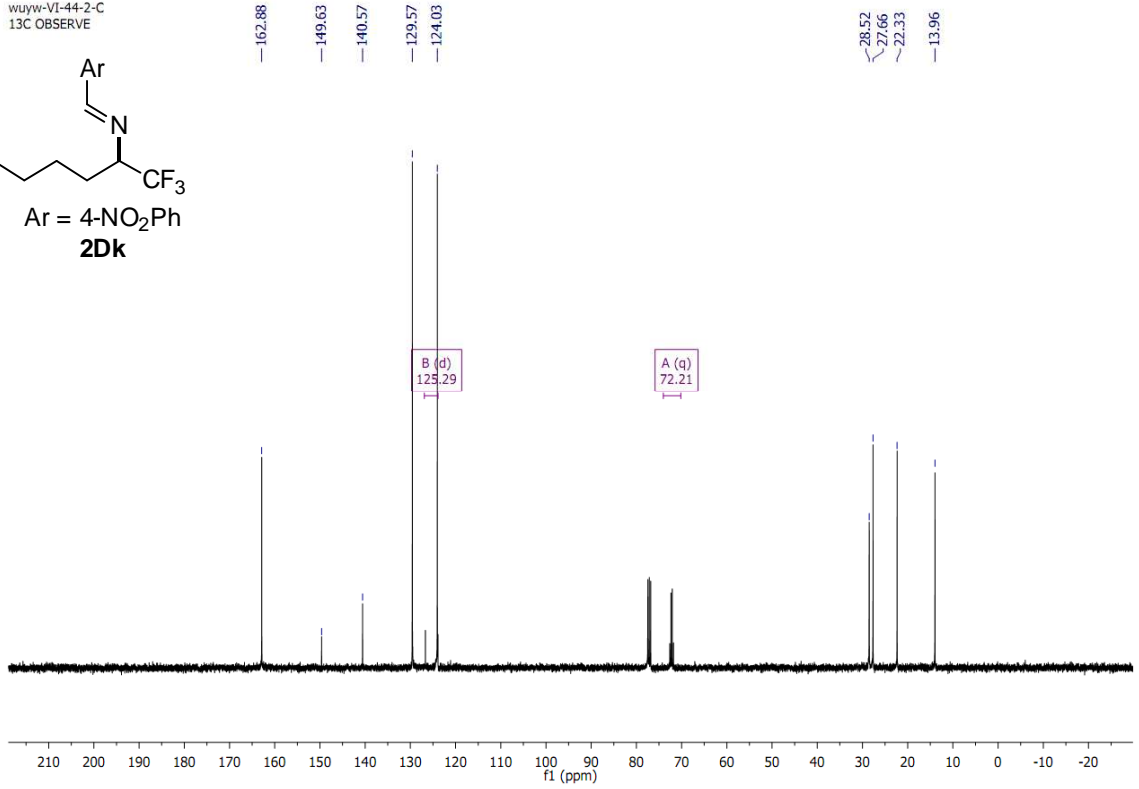

wuyw-VI-44-2-F  
F19 OBSERVE  
STANDARD PARAMETERS

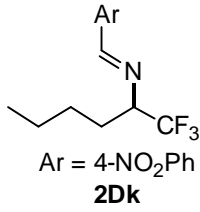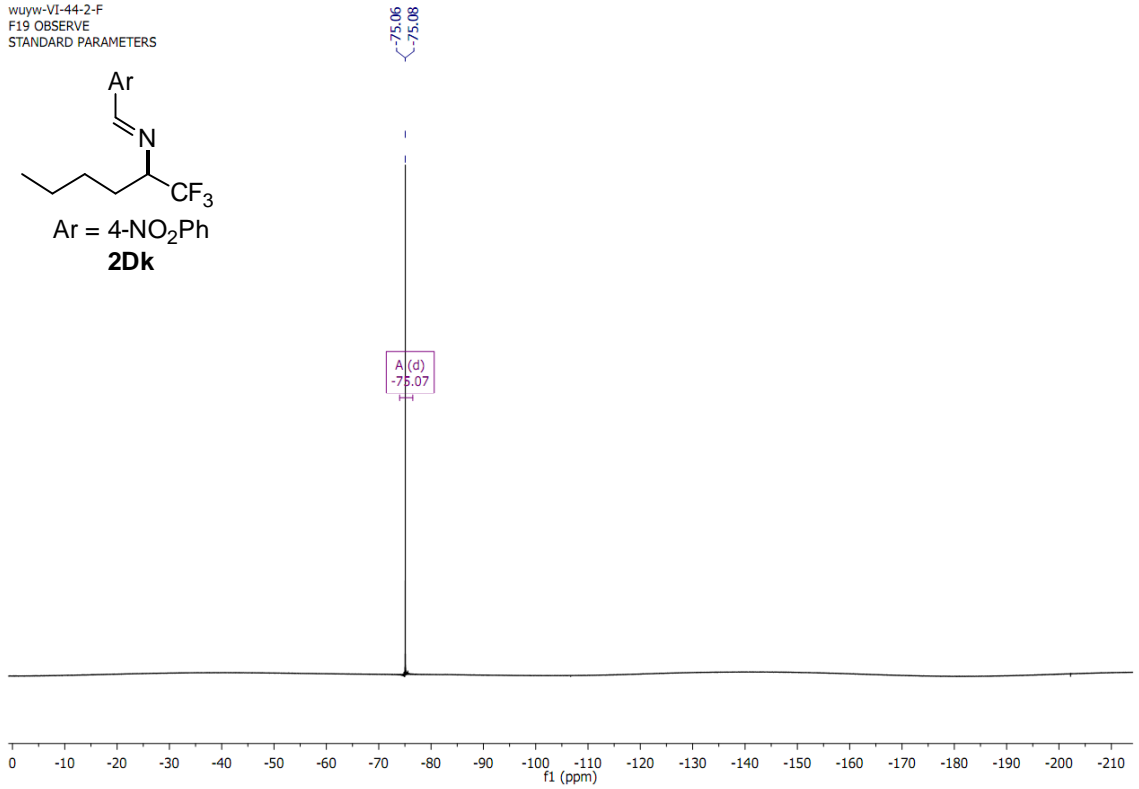

Data File C:\CHEM32\1\DATA\WUYW\WUYW-VI-43-RAC-2.D  
Sample Name: WUYW-VI-43-rac

```

-----
Acq. Operator   : wuyw                               Location   : Vial 21
Acq. Instrument : Instrument 1                         Inj Volume  : 5 µl
Injection Date  : 2/8/2012 5:24:43 PM
Acq. Method    : C:\CHEM32\1\METHODS\METHOD1.M
Last changed   : 2/8/2012 5:02:37 PM by wuyw
                (modified after loading)
Analysis Method: C:\CHEM32\1\METHODS\METHOD1.M
Last changed   : 5/1/2012 2:53:10 PM by DAVID
                (modified after loading)
Sample Info    : O2-H, Hex/IPA=95/5, 1.0mL/min, 254nm, left, 25C, 45bar
-----

```

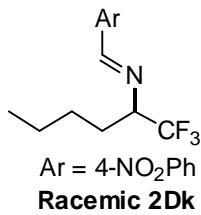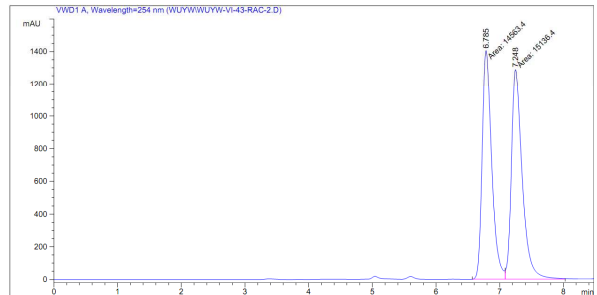

Area Percent Report

```

-----
Sorted By      : Signal
Multiplier     : 1.0000
Dilution       : 1.0000
Sample Amount  : 5.00000 [ng/ul] (not used in calc.)
Use Multiplier & Dilution Factor with ISTDs

Signal 1: VXD1 A, WaveLength=254 nm
-----
Peak RetTime Type Width Area Height Area
# [min] [min] mAU *s [mAU] %
-----|-----|-----|-----|-----|-----
1 6.785 MF 0.1728 1.45634e4 1404.46753 49.0354
2 7.248 FM 0.1959 1.51364e4 1287.48560 50.9646
-----|-----|-----|-----|-----|-----
Totals : 2.96999e4 2691.95313
-----
*** End of Report ***

```

Instrument 1 5/1/2012 2:54:00 PM DAVID

Page 1 of 1



Data File C:\CHEM32\1\DATA\MUVW\WUYW-VI-44-2-SEP-2.D  
 Sample Name: wuyw-VI-44-2-sep

-----  
 Acq. Operator : wuyw Seq. Line : 2  
 Acq. Instrument : Instrument 1 Location : Vial 21  
 Injection Date : 2/11/2012 7:10:49 PM Inj : 1  
 Inj Volume : 3 µl  
 Acq. Method : C:\CHEM32\1\METHODS\METHOD1.M  
 Last changed : 2/11/2012 6:57:01 PM by wuyw  
 (modified after loading)  
 Analysis Method : C:\CHEM32\1\METHODS\METHOD1.M  
 Last changed : 2/13/2012 10:02:42 AM by wuyw  
 (modified after loading)  
 Sample Info : 03-H, Hex/IPA=95/5, 1.0mL/min, 254nm, left, 25C, 45bar

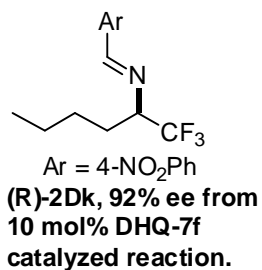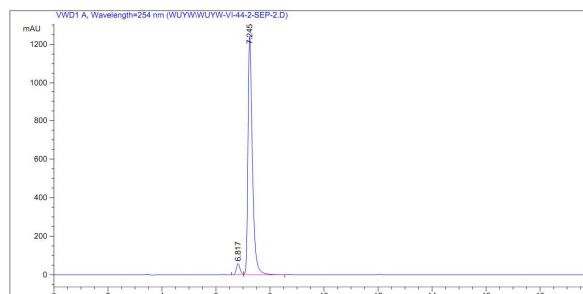

-----  
 Area Percent Report  
 -----

Sorted By : Signal  
 Multiplier : 1.0000  
 Dilution : 1.0000  
 Use Multiplier & Dilution Factor with ISTDs

Signal 1: VWD1 A, Wavelength=254 nm

| Peak #   | RetTime [min] | Type | Width [min] | Area [mAU] | Area %     | Height [mAU] | Area % |
|----------|---------------|------|-------------|------------|------------|--------------|--------|
| 1        | 6.817         | VB   | 0.1481      | 564.92944  | 58.26552   | 3.8930       |        |
| 2        | 7.245         | VB   | 0.1708      | 1.41737e4  | 1243.48376 | 96.1670      |        |
| Totals : |               |      |             | 1.47386e4  | 1301.74929 |              |        |

-----  
 \*\*\* End of Report \*\*\*

Created with novaPDF Printer ([www.novapdf.com](http://www.novapdf.com)). Please register to remove this message.

Page 1 of 1

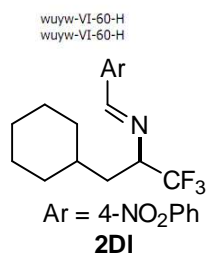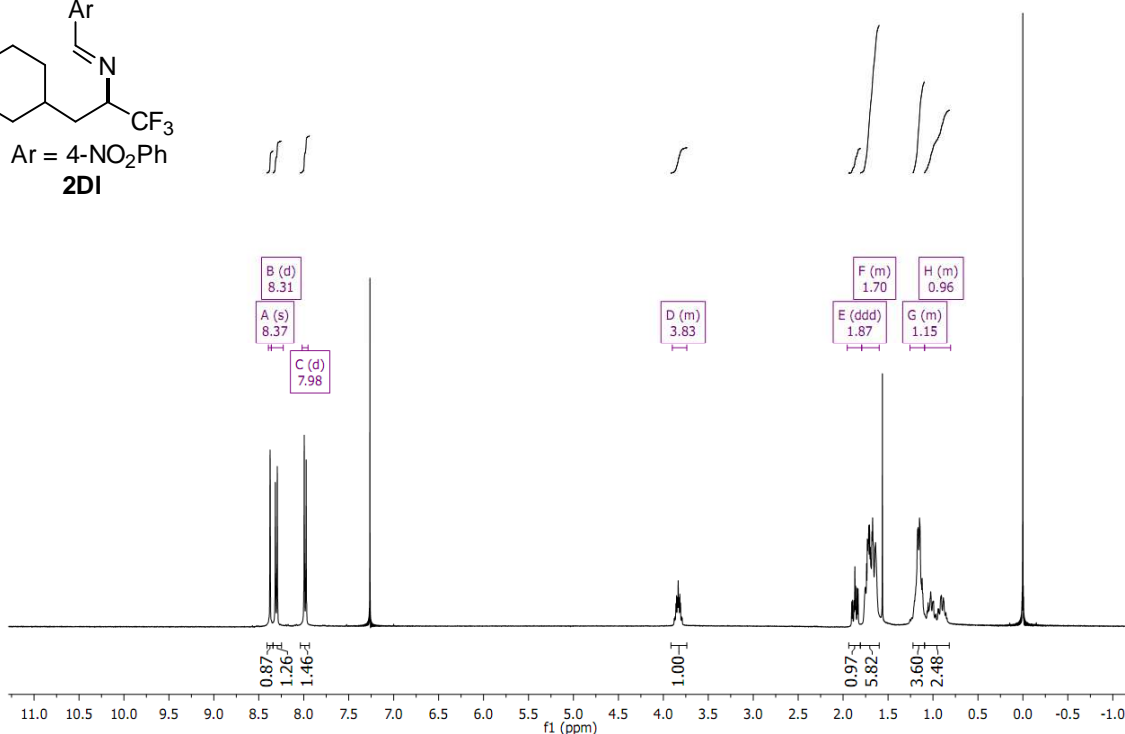

wuyw-VI-60-C  
13C OBSERVE

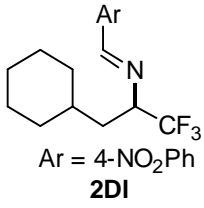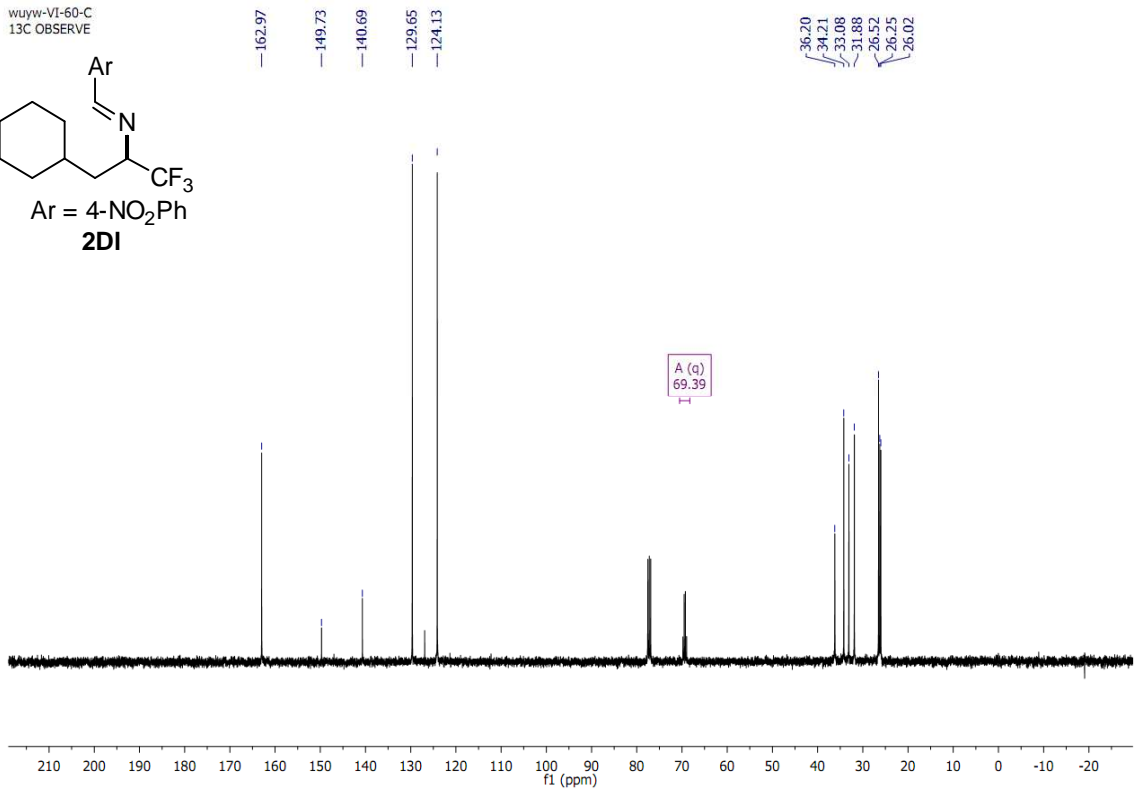

wuyw-VI-60-F  
F19 OBSERVE  
STANDARD PARAMETERS

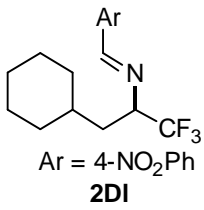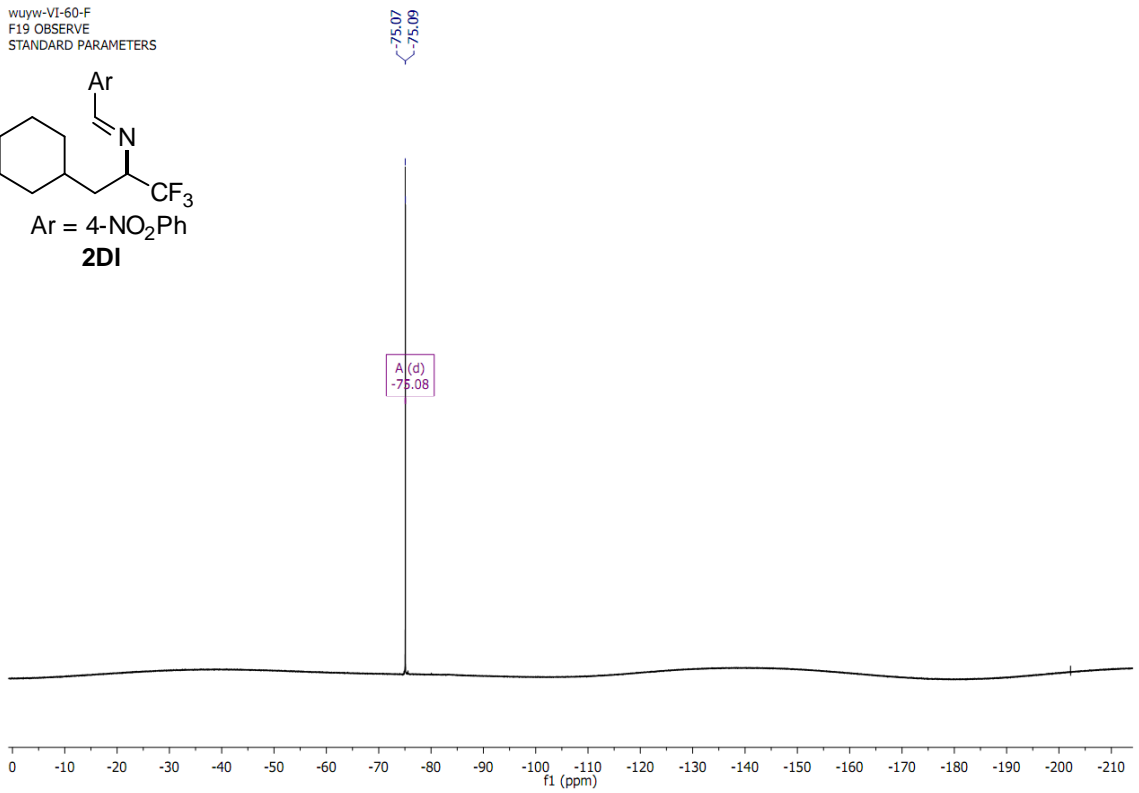

Data File C:\CHEM32\1\DATA\MUYW\WUYW-VI-60-RAC-2.D  
 Sample Name: wuyw-VI-60-rac

-----  
 Acq. Operator : wuyw  
 Acq. Instrument : Instrument 1 Location : Vial 21  
 Injection Date : 3/14/2012 1:34:49 PM Inj Volume : 5 µl  
 Acq. Method : C:\CHEM32\1\METHODS\METHOD1.M  
 Last changed : 3/14/2012 11:32:00 PM by wuyw  
 (modified after loading)  
 Analysis Method : C:\CHEM32\1\METHODS\METHOD1.M  
 Last changed : 3/13/2012 9:51:41 PM by xiao  
 Sample Info : AS-H, Hep/IPA-90/10, 1.0 mL/min, 254 nm, left, 25C, 51b  
 at

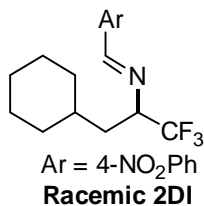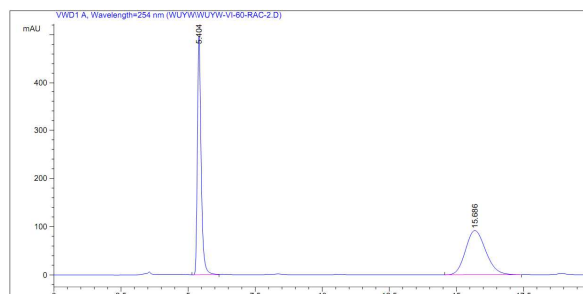

-----  
 Area Percent Report  
 -----  
 Sorted By : Signal  
 Multiplier : 1.0000  
 Dilution : 1.0000  
 Use Multiplier & Dilution Factor with ISTDs

Signal 1: VWD1 A, Wavelength=254 nm

| Peak #   | RetTime [min] | Type | Width [min] | Area [mAU] | Height [mAU] | Area %  |
|----------|---------------|------|-------------|------------|--------------|---------|
| 1        | 5.404         | VB   | 0.1455      | 4773.54492 | 497.40454    | 49.8012 |
| 2        | 15.686        | BB   | 0.8152      | 4811.64892 | 91.81660     | 50.1988 |
| Totals : |               |      |             | 9585.19385 | 589.22115    |         |

-----  
 \*\*\* End of Report \*\*\*

Instrument 1 3/20/2012 9:26:29 AM jpchen Page 1 of 1  
 Data File C:\CHEM32\1\DATA\MUYW\WUYW-VI-60-1-SEP-1.D  
 Sample Name: WUYW-VI-60-1-sep

-----  
 Acq. Operator : wuyw  
 Acq. Instrument : Instrument 1 Location : Vial 21  
 Injection Date : 3/19/2012 9:42:27 PM Inj Volume : 10 µl  
 Acq. Method : C:\CHEM32\1\METHODS\METHOD1.M  
 Last changed : 3/19/2012 9:38:49 PM by wuyw  
 (modified after loading)  
 Analysis Method : C:\CHEM32\1\METHODS\METHOD1.M  
 Last changed : 3/13/2012 9:51:41 PM by xiao  
 Sample Info : OJ-H, Hep/IPA-90/10, 1.0 mL/min, 254nm, left, 25C, 51ba  
 r

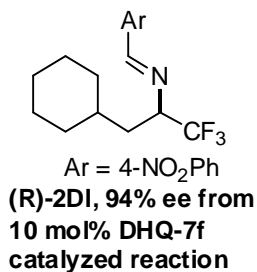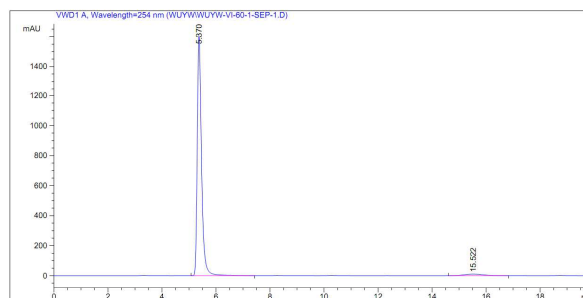

-----  
 Area Percent Report  
 -----  
 Sorted By : Signal  
 Multiplier : 1.0000  
 Dilution : 1.0000  
 Use Multiplier & Dilution Factor with ISTDs

Signal 1: VWD1 A, Wavelength=254 nm

| Peak #   | RetTime [min] | Type | Width [min] | Area [mAU] | Height [mAU] | Area %  |
|----------|---------------|------|-------------|------------|--------------|---------|
| 1        | 5.370         | VB   | 0.1662      | 1.76486e4  | 1604.89795   | 97.0981 |
| 2        | 15.522        | BB   | 0.7618      | 527.44861  | 10.58724     | 2.9019  |
| Totals : |               |      |             | 1.81760e4  | 1615.48519   |         |

-----  
 \*\*\* End of Report \*\*\*

Instrument 1 3/20/2012 9:27:45 AM jpchen Page 1 of 1

wuyw-VI-69-2-H  
wuyw-VI-69-2-H

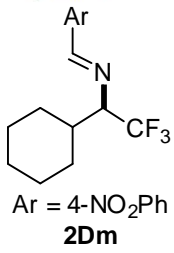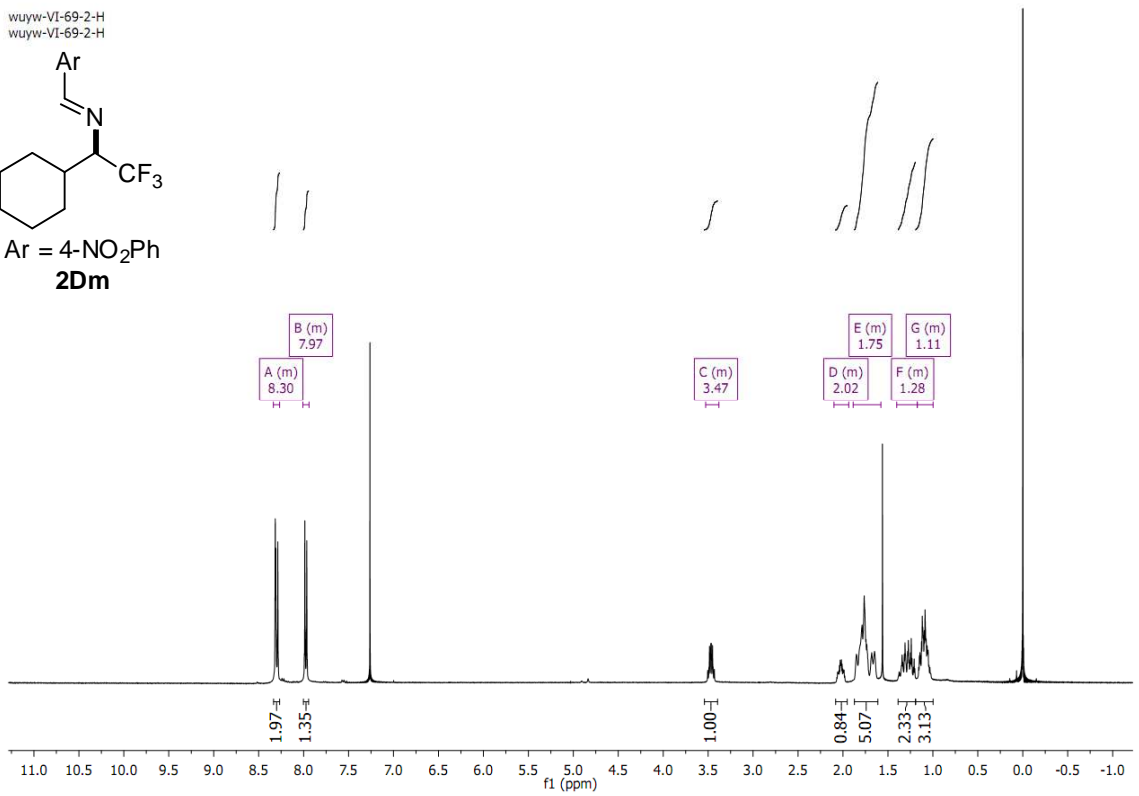

wuyw-VI-69-2-C  
wuyw-VI-69-2-C

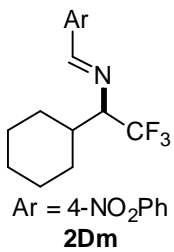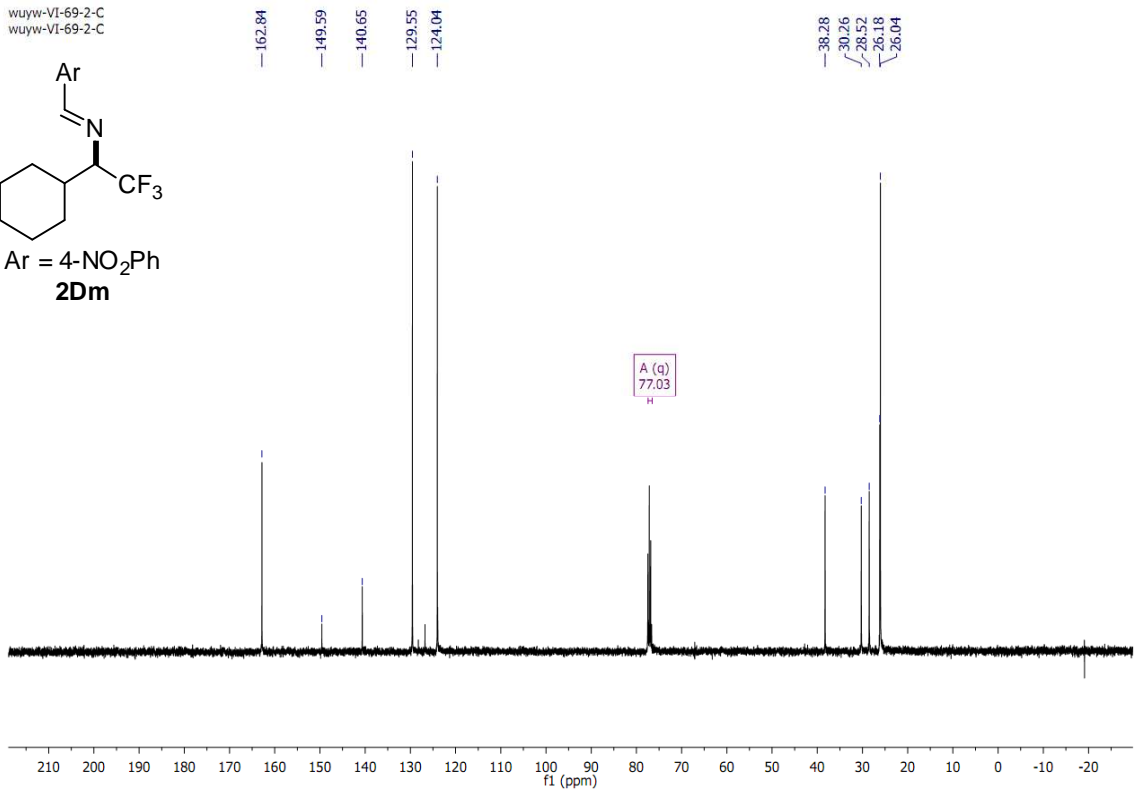

wuyw-VI-69-2-F  
F19 OBSERVE  
STANDARD PARAMETERS

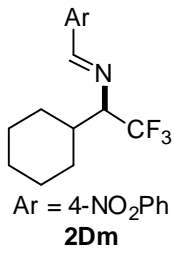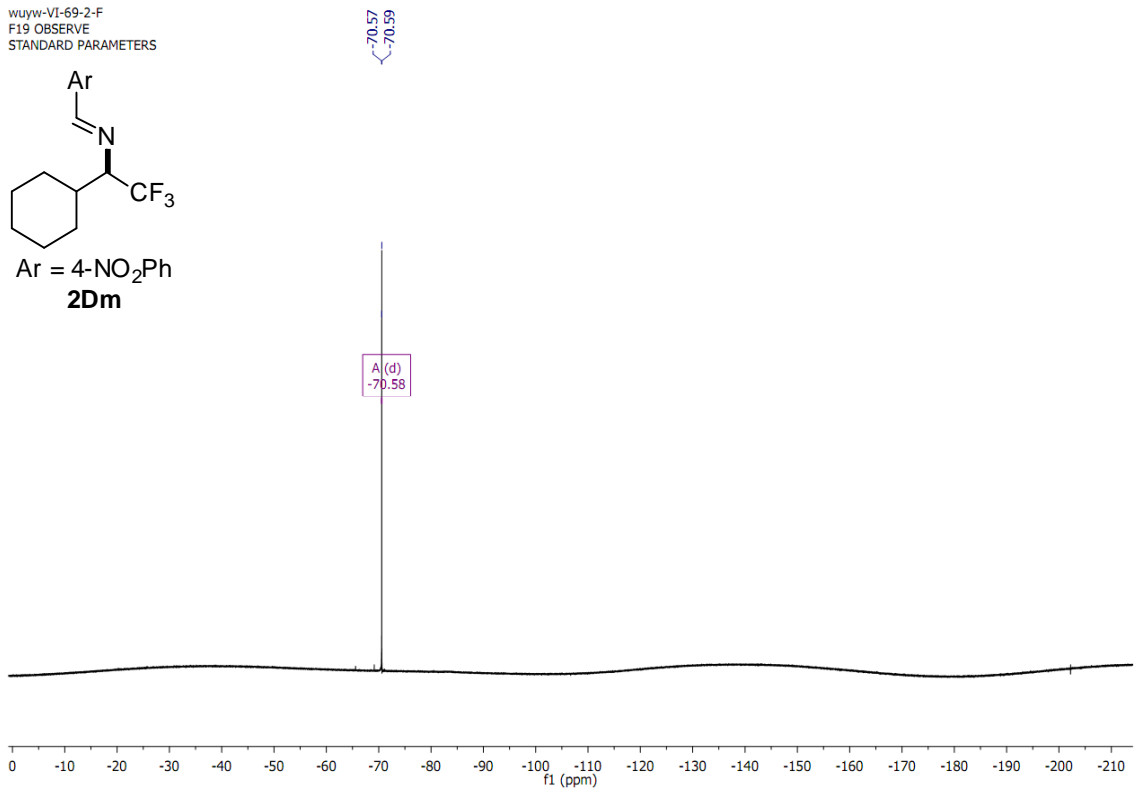

Data File C:\CHEM32\1\DATA\WUYW\WUYW-VI-65-S1-2.D  
Sample Name: wuyw-VI-65-S1

```
-----
Acq. Operator   : wuyw                      Seq. Line :    1
Acq. Instrument : Instrument 1              Location  : Vial 21
Injection Date  : 3/24/2012 6:50:48 PM     Inj       :    1
                                           Inj Volume: 6 µl
Acq. Method    : C:\CHEM32\1\METHODS\METHOD1.M
Last changed   : 3/24/2012 6:40:19 PM by wuyw
Analysis Method : C:\CHEM32\1\METHODS\METHOD1.M
Last changed   : 5/2/2012 10:52:57 AM by DAVID
                (modified after loading)
Sample Info    : AS-H, Hex/IPA-90/10, 1.0ml/min, left, 51bar, 254nm, 25C
-----
```

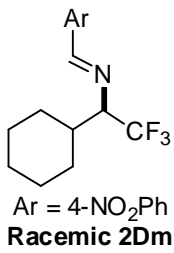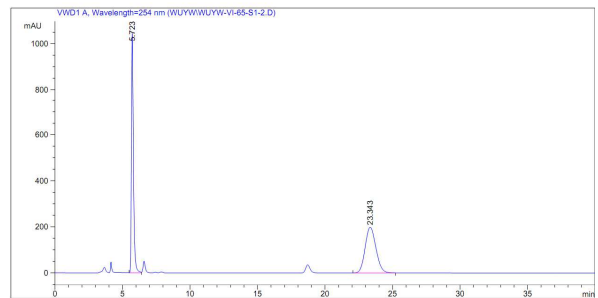

Area Percent Report

```
-----
Sorted By      : Signal
Multiplier     : 1.0000
Dilution       : 1.0000
Use Multiplier & Dilution Factor with ISTDs

Signal 1: VWD1 A, Wavelength=254 nm
Peak RetTime Type Width Area Height Area
# [min] [min] [min] mAU *s [mAU] %
-----|-----|-----|-----|-----|-----
1 5.723 BV 0.1539 1.07376e4 1045.21301 49.3427
2 23.343 BB 0.8639 1.10234e4 198.79279 50.6573
Totals : 2.17607e4 1244.00580
-----
```

\*\*\* End of Report \*\*\*

Data File C:\CHEM32\1\DATA\MUVW\MUVW-VI-69-2-SEP-1.D  
 Sample Name: wuyw-VI-69-2-sep

-----  
 Acq. Operator : wuyw Seq. Line : 1  
 Acq. Instrument : Instrument 1 Location : Vial 21  
 Injection Date : 3/30/2012 6:05:31 PM Inj : 1  
 Inj Volume : 10 µl  
 Acq. Method : C:\CHEM32\1\METHODS\METHOD1.M  
 Last changed : 3/30/2012 6:02:17 PM by wuyw  
 Analysis Method : C:\CHEM32\1\METHODS\METHOD1.M  
 Last changed : 5/2/2012 10:52:57 AM by DAVID  
 (modified after loading)  
 Sample Info : AS-H, Hex/IPA-90/10, 1.0ml/min, left, 51bar, 254nm, 25C

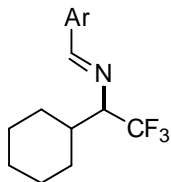

Ar = 4-NO<sub>2</sub>Ph  
**(R)-2Dm, 91% ee from  
 10 mol% DHQ-7f  
 catalyzed reaction.**

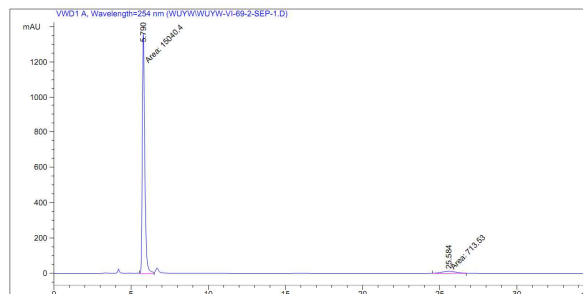

Area Percent Report

Sorted By : Signal  
 Multiplier : 1.0000  
 Dilution : 1.0000  
 Use Multiplier & Dilution Factor with ISTDs

Signal 1: VWD1 A, Wavelength=254 nm

| Peak # | RetTime [min] | Type | Width [min] | Area [mAU*s] | Height [mAU] | Area %  |
|--------|---------------|------|-------------|--------------|--------------|---------|
| 1      | 5.790         | MM   | 0.1847      | 1.5040464    | 1357.48755   | 96.4708 |
| 2      | 25.584        | MM   | 1.0283      | 713.52979    | 11.56446     | 4.5292  |

Totals : 1.5753964 1369.05201

\*\*\* End of Report \*\*\*

Instrument 1 5/2/2012 10:59:24 AM DAVID

Page 1 of 1

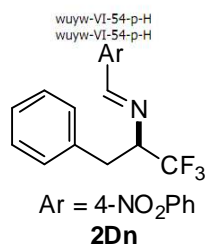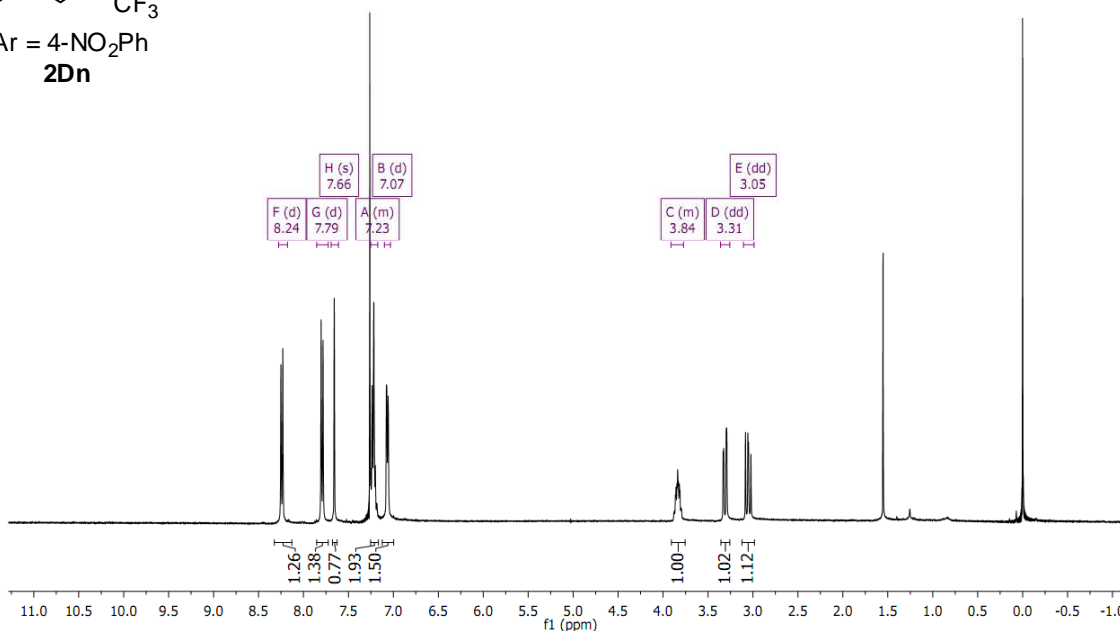

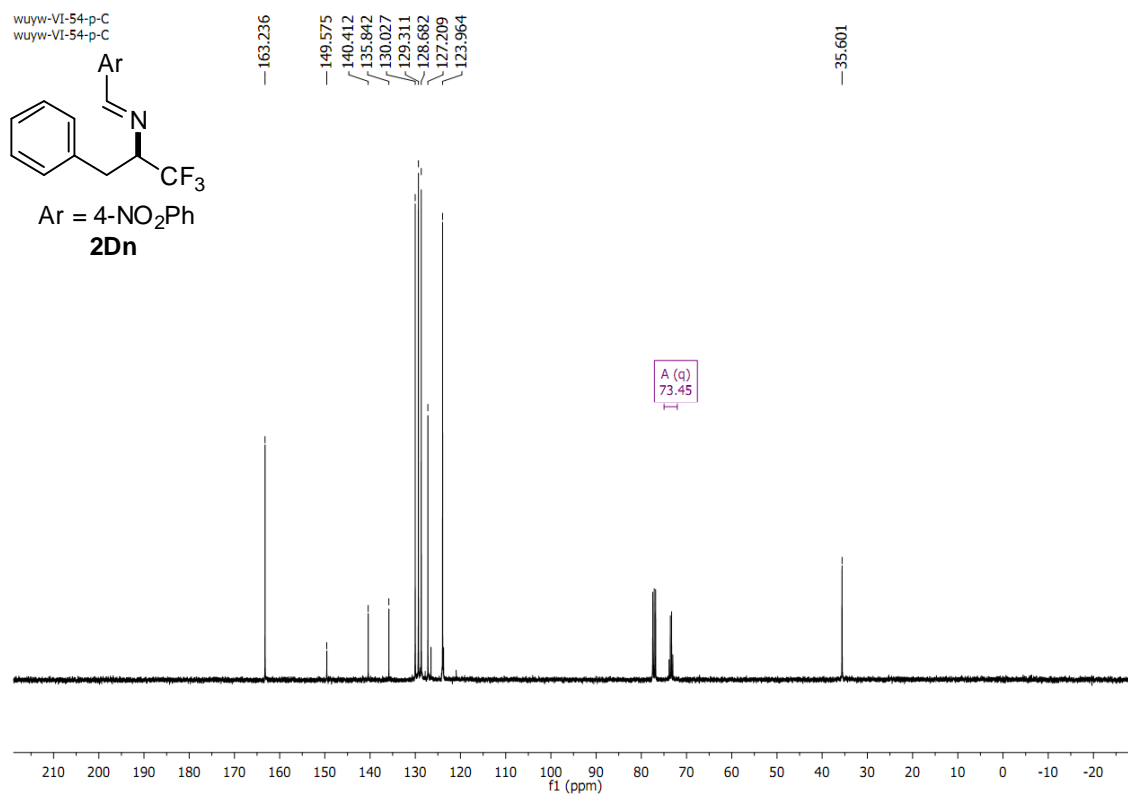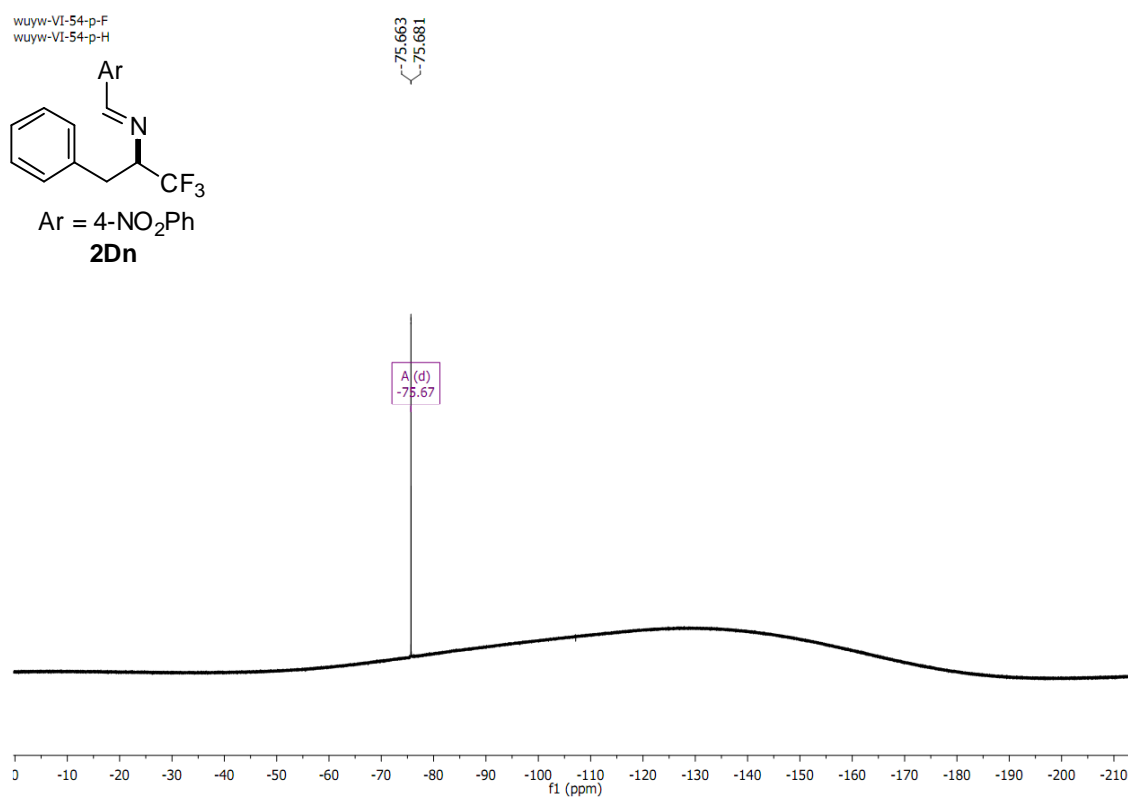

Data File C:\CHEM32\1\DATA\WUYW\WUYW-VI-40-1-3.D  
Sample Name: wuyw-VI-40-1

-----  
Acq. Operator : wuyw  
Acq. Instrument : Instrument 1 Location : Vial 21  
Injection Date : 3/29/2012 10:40:24 AM Inj Volume : 5 µl  
Acq. Method : C:\CHEM32\1\METHODS\METHOD1.M  
Last changed : 3/29/2012 10:37:46 AM by wuyw  
(modified after loading)  
Analysis Method : C:\CHEM32\1\METHODS\METHOD1.M  
Last changed : 5/2/2012 10:52:17 AM by DAVID  
(modified after loading)  
Sample Info : O3-H, Hep/IPA=90/10, 1.0 mL/min, 254nm, left, 25C, 47ba  
-----

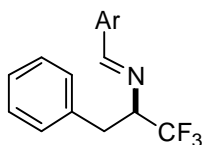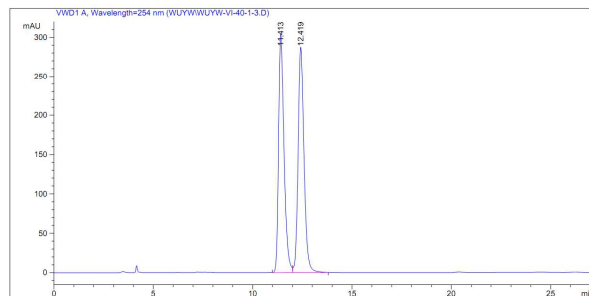

-----  
Area Percent Report  
-----  
Sorted By : Signal  
Multiplier : 1.0000  
Dilution : 1.0000  
Use Multiplier & Dilution Factor with ISTDs  
-----  
Signal 1: WVD1 A, Wavelength=254 nm  
-----  
Peak RetTime Type Width Area Height Area  
# [min] [min] [mAU] \*s [mAU] %  
-----  
1 11.413 BV 0.2877 5798.15088 304.49158 49.4558  
2 12.419 VB 0.3134 5925.74316 287.33719 50.5442  
-----  
Totals : 1.17239e4 591.82877  
-----  
\*\*\* End of Report \*\*\*

Instrument 1 5/2/2012 11:12:32 AM DAVID

Page 1 of 1

Data File C:\CHEM32\1\DATA\WUYW\WUYW-VI-54-SEP-2.D  
Sample Name: wuyw-VI-54-sep

-----  
Acq. Operator : wuyw  
Acq. Instrument : Instrument 1 Seq. Line : 1  
Injection Date : 3/6/2012 12:14:42 PM Location : Vial 21  
Inj : 1  
Inj Volume : 15 µl  
Acq. Method : C:\CHEM32\1\METHODS\METHOD1.M  
Last changed : 3/6/2012 12:12:15 PM by wuyw  
Analysis Method : C:\CHEM32\1\METHODS\METHOD1.M  
Last changed : 5/26/2012 4:20:13 PM by wuyw  
Sample Info : O3-H, Hex/IPA=90/10, 1.0mL/min, 254nm, 25C, left, 47bar  
-----

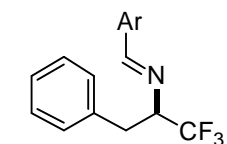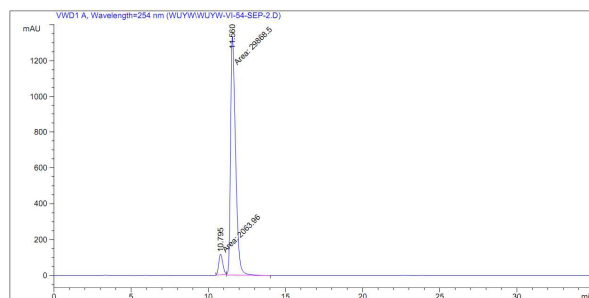

-----  
Area Percent Report  
-----  
Sorted By : Signal  
Multiplier : 1.0000  
Dilution : 1.0000  
Use Multiplier & Dilution Factor with ISTDs  
-----  
Signal 1: WVD1 A, Wavelength=254 nm  
-----  
Peak RetTime Type Width Area Height Area  
# [min] [min] [mAU] \*s [mAU] %  
-----  
1 10.795 MM 0.3003 2063.96069 114.55701 6.4635  
2 11.560 MM 0.3739 2.9868564 1331.34167 93.5365  
-----  
Totals : 3.19325e4 1445.89868  
-----  
\*\*\* End of Report \*\*\*

Instrument 1 6/8/2012 2:38:26 PM xiao

Page 1 of 1



# $^1\text{H}$ and $^{13}\text{C}$ NMR spectra and HPLC spectra for Amine salts **8**

wuyw-VI-81-2-p  
wuyw-VI-81-2-p

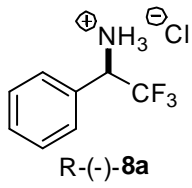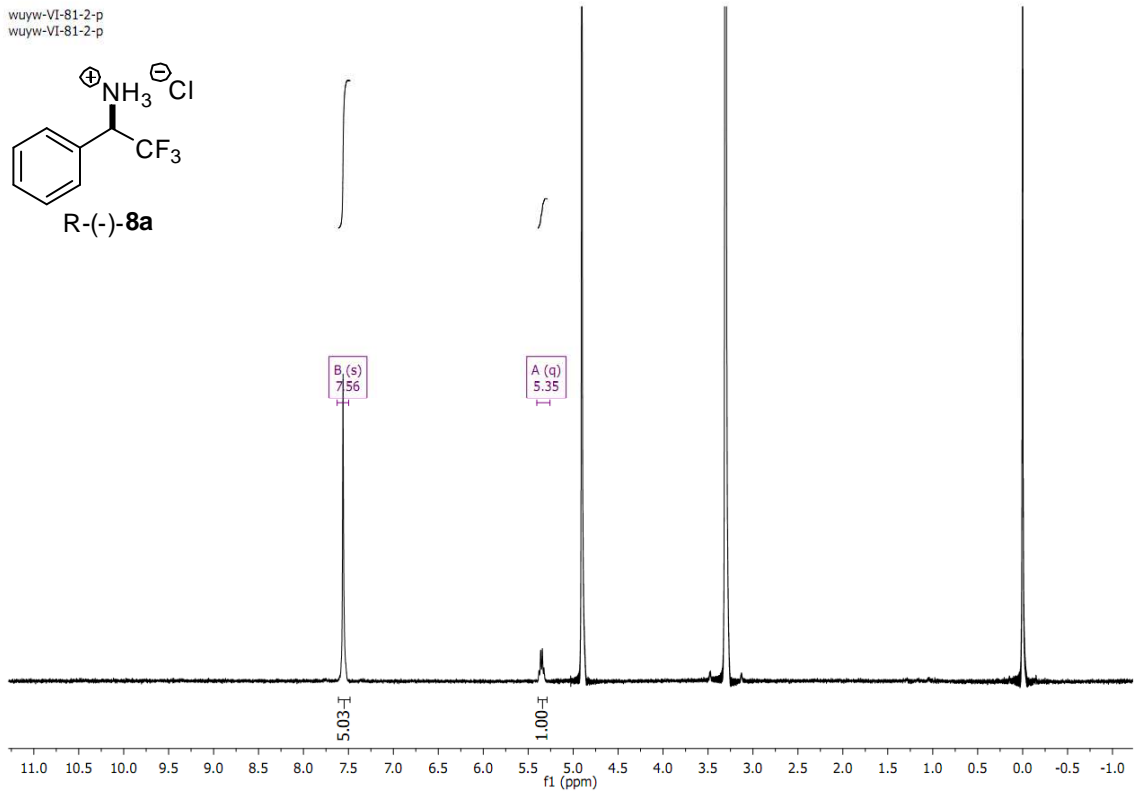

wuyw-VI-81-2-p-F  
F19 OBSERVE  
STANDARD PARAMETERS

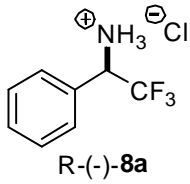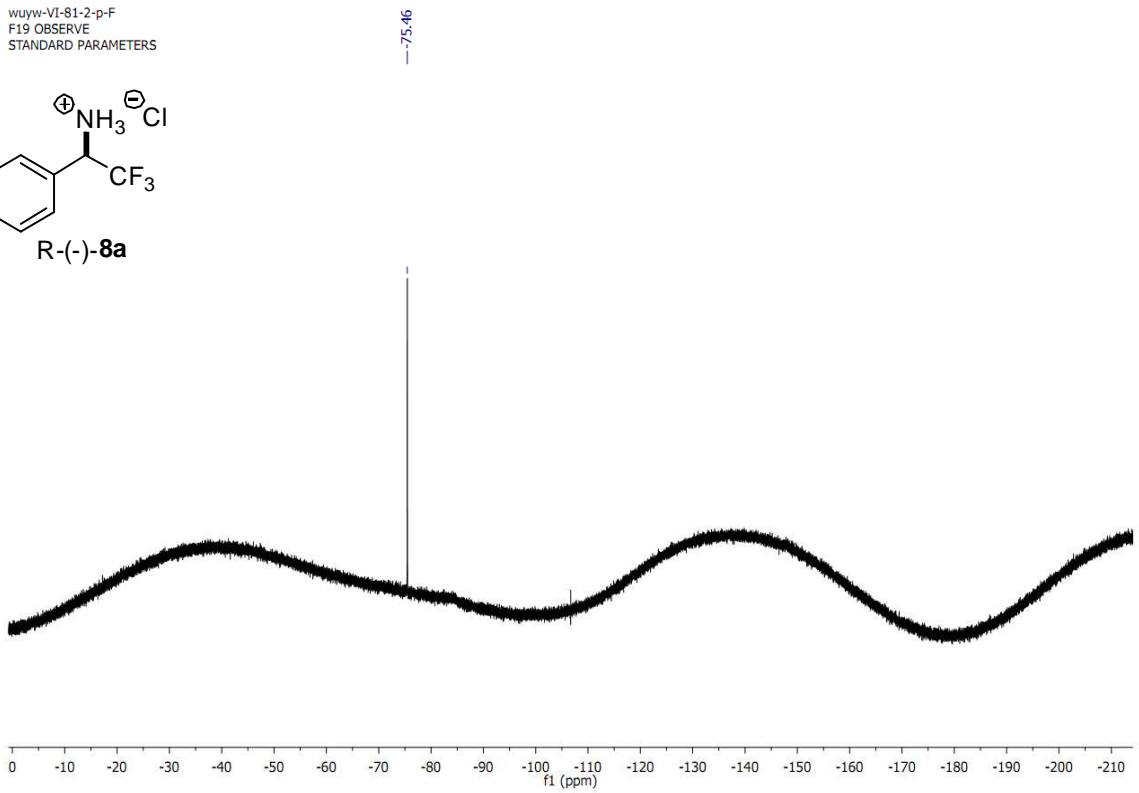

wuyw-VI-87-H  
wuyw-VI-87-H

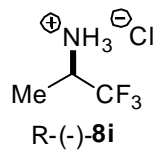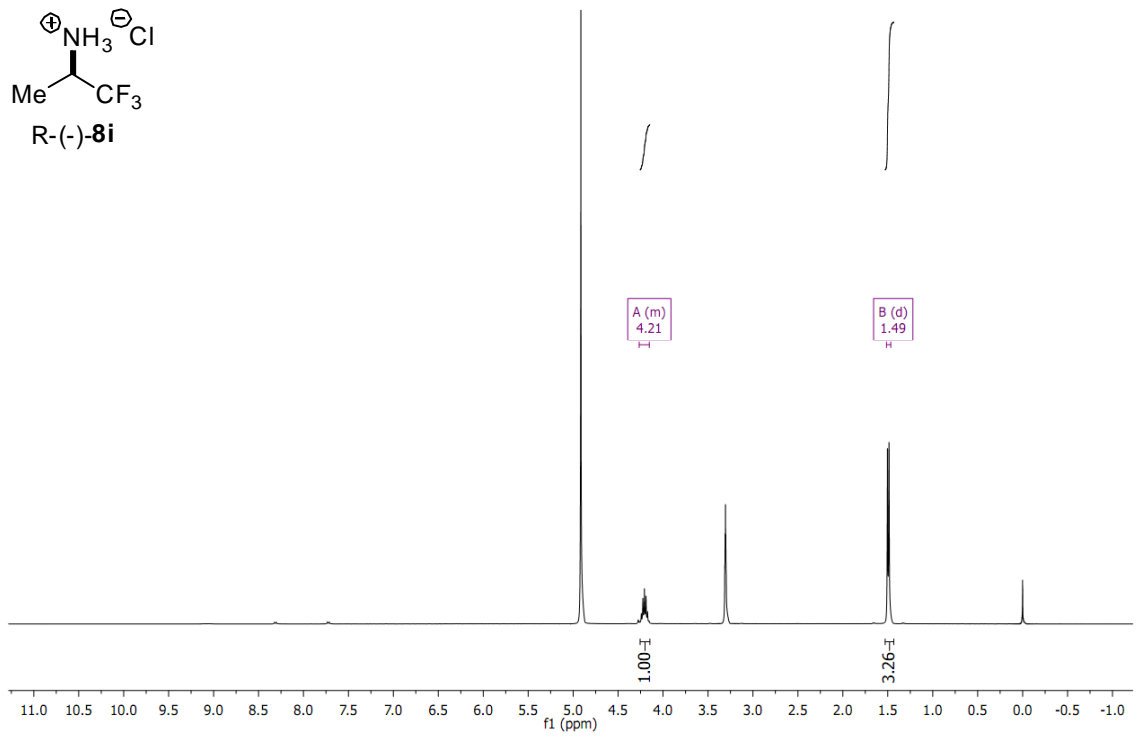

wuyw-VI-87-F  
F19 OBSERVE  
STANDARD PARAMETERS

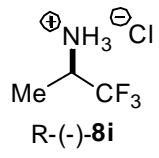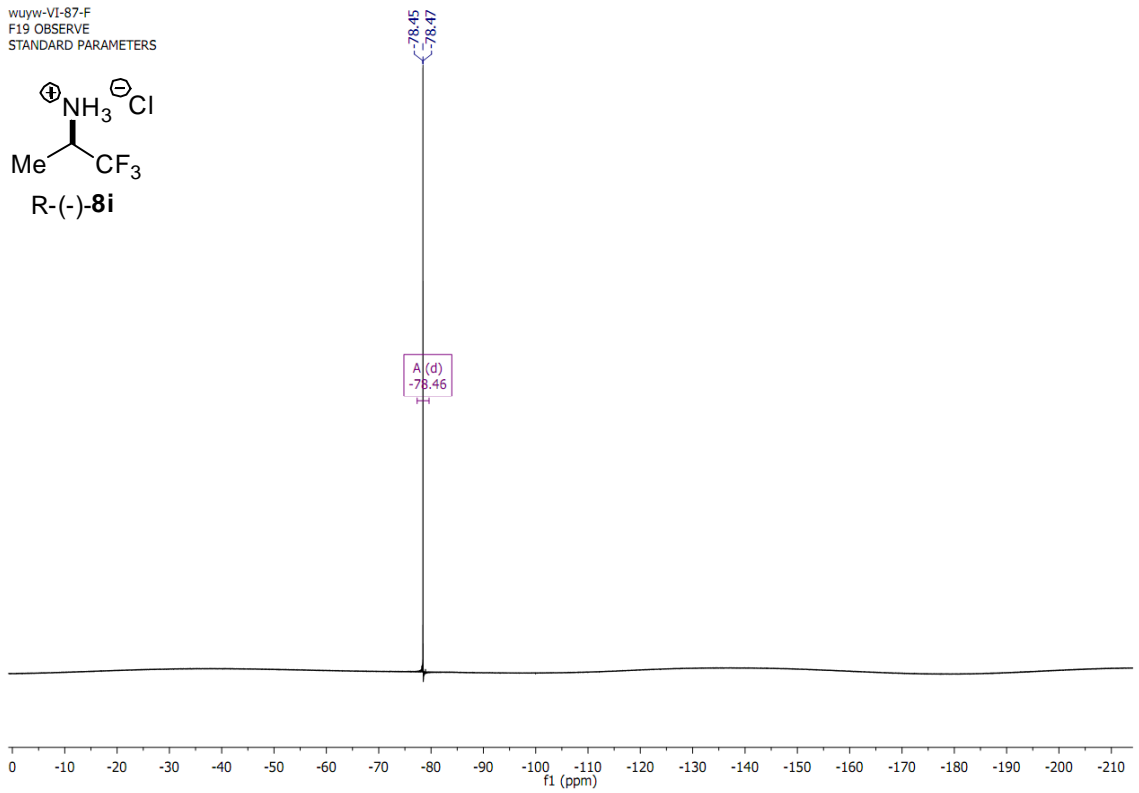

wuyw-VI-111-H  
wuyw-VI-111

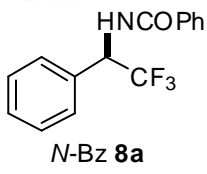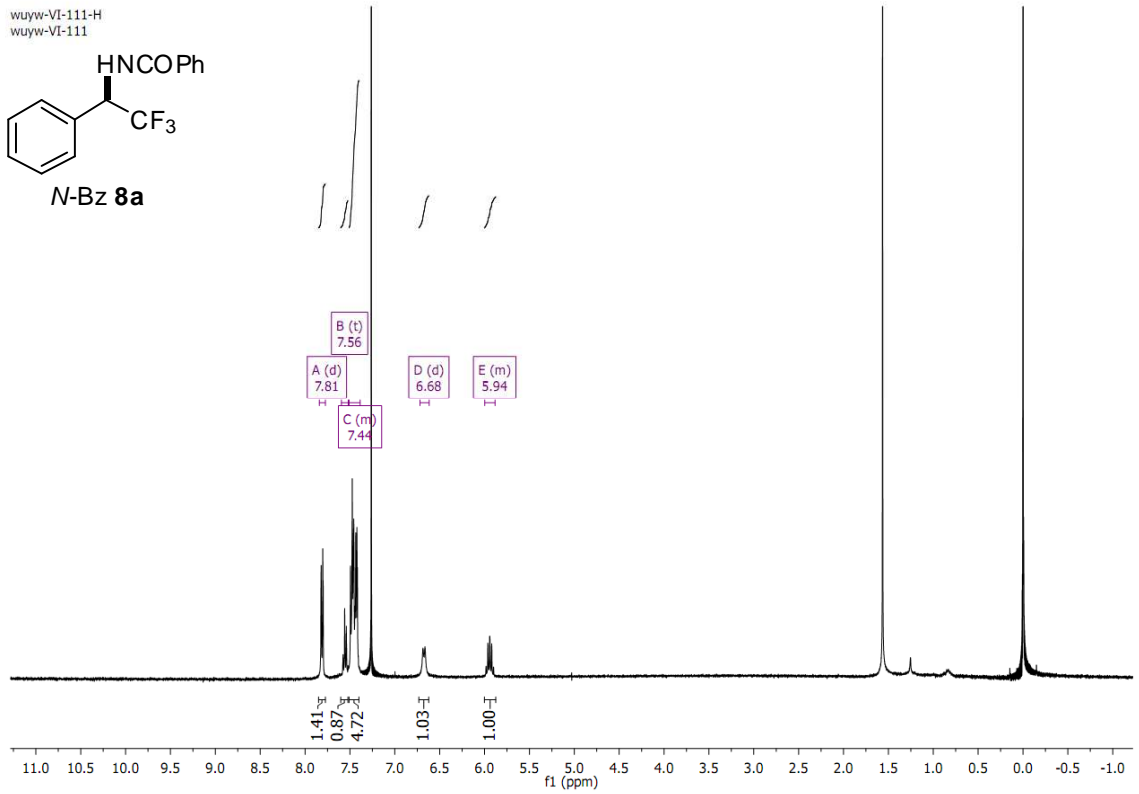

wuyw-VI-111-F  
F19 OBSERVE  
STANDARD PARAMETERS

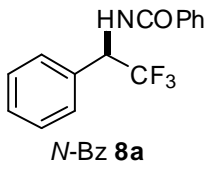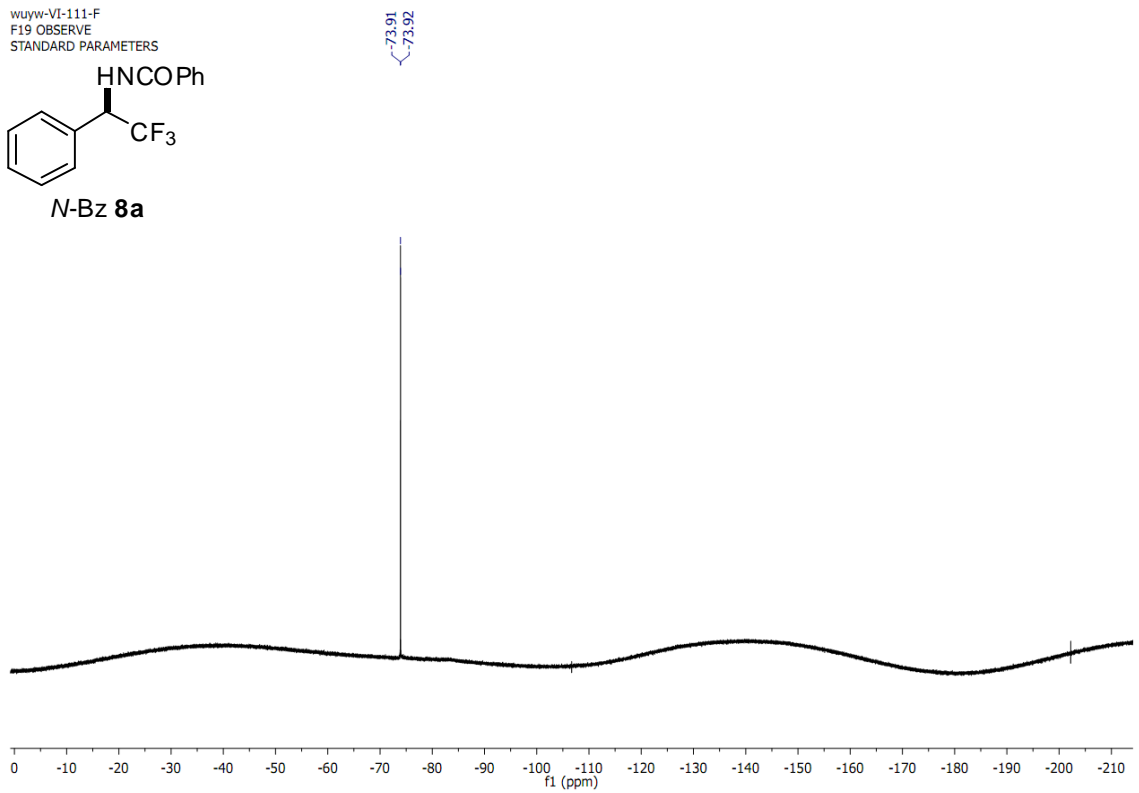

Data File C:\CHEM32\1\DATA\WUYW\WUYW-VI-111-RAC-1.D  
Sample Name: wuyw-VI-111-rac-1

=====  
Acq. Operator : wuyw Seq. Line : 1  
Acq. Instrument : Instrument 1 Location : Vial 21  
Injection Date : 6/20/2012 2:57:38 PM Inj : 1  
Inj Volume : 10 µl  
Different Inj Volume from Sequence ! Actual Inj Volume : 5 µl  
Acq. Method : C:\CHEM32\1\METHODS\METHOD1.M  
Last changed : 6/20/2012 3:13:59 PM by wuyw  
(modified after loading)  
Analysis Method : C:\CHEM32\1\METHODS\METHOD1.M  
Last changed : 6/18/2012 3:42:28 PM by wuyw  
(modified after loading)  
Sample Info : OJ-H, Hex/IPA=80/20, 1.0 mL/min, 220nm, 54bar, left

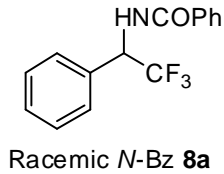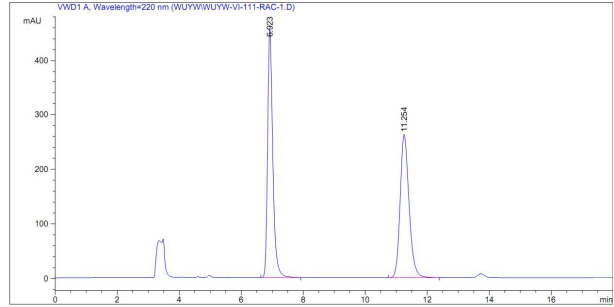

=====  
Area Percent Report  
=====  
Sorted By : Signal  
Multiplier : 1.0000  
Dilution : 1.0000  
Use Multiplier & Dilution Factor with ISTDs

Signal 1: VWD1 A, Wavelength=220 nm

| Peak # | RetTime [min] | Type | Width [min] | Area [mAU * s] | Height [mAU] | Area %  |
|--------|---------------|------|-------------|----------------|--------------|---------|
| 1      | 6.293         | BB   | 0.1739      | 5267.27197     | 456.59460    | 50.2084 |
| 2      | 11.254        | BB   | 0.3057      | 5223.55566     | 261.63541    | 49.7916 |

Totals : 1.04908e4 718.23001

=====  
\*\*\* End of Report \*\*\*

Instrument 1 6/21/2012 11:36:57 AM wuyw

Page 1 of 1

Data File C:\CHEM32\1\DATA\WUYW\WUYW-VI-111-2.D  
Sample Name: wuyw-VI-111

=====  
Acq. Operator : wuyw Seq. Line : 2  
Acq. Instrument : Instrument 1 Location : Vial 22  
Injection Date : 6/20/2012 3:18:12 PM Inj : 1  
Inj Volume : 10 µl  
Different Inj Volume from Sequence ! Actual Inj Volume : 8 µl  
Acq. Method : C:\CHEM32\1\METHODS\METHOD1.M  
Last changed : 6/20/2012 3:13:59 PM by wuyw  
(modified after loading)  
Analysis Method : C:\CHEM32\1\METHODS\METHOD1.M  
Last changed : 6/18/2012 3:42:28 PM by wuyw  
(modified after loading)  
Sample Info : OJ-H, Hex/IPA=80/20, 1.0 mL/min, 220nm, 54bar, left

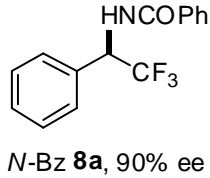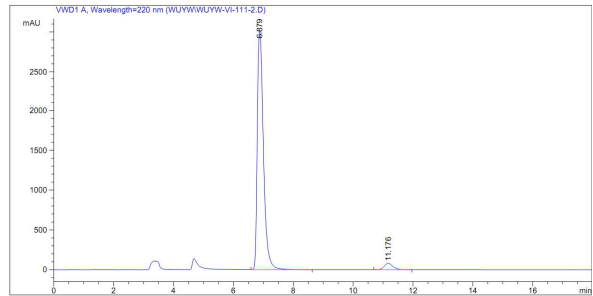

=====  
Area Percent Report  
=====  
Sorted By : Signal  
Multiplier : 1.0000  
Dilution : 1.0000  
Use Multiplier & Dilution Factor with ISTDs

Signal 1: VWD1 A, Wavelength=220 nm

| Peak # | RetTime [min] | Type | Width [min] | Area [mAU * s] | Height [mAU] | Area %  |
|--------|---------------|------|-------------|----------------|--------------|---------|
| 1      | 6.879         | BB   | 0.2192      | 4.27329e4      | 3014.76904   | 96.3566 |
| 2      | 11.176        | BB   | 0.3038      | 1616.81470     | 80.20593     | 3.6434  |

Totals : 4.43487e4 3094.97499

=====  
\*\*\* End of Report \*\*\*

Instrument 1 6/21/2012 1:11:53 PM wuyw

Page 1 of 1

wuyw-VI-112-rac-2  
wuyw-VI-112-rac-2

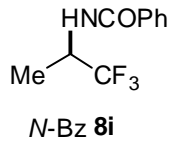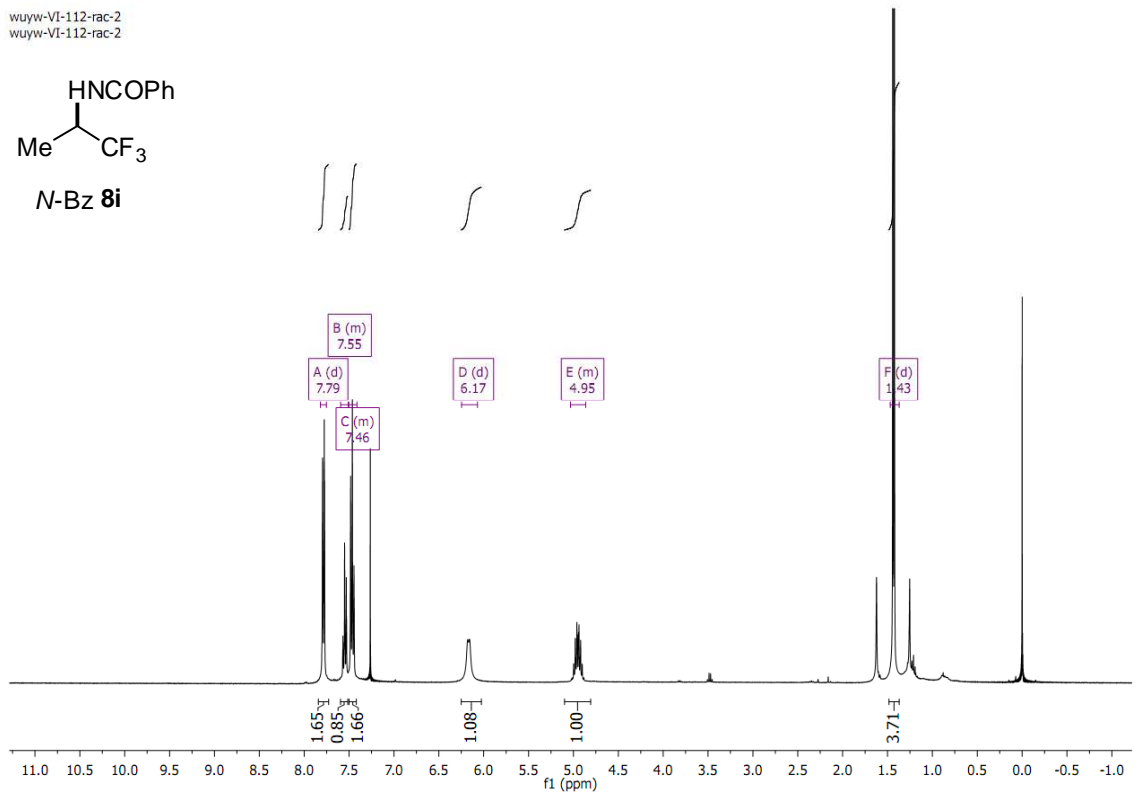

wuyw-VI-112-rac-2-F  
F19 OBSERVE  
STANDARD PARAMETERS

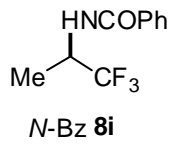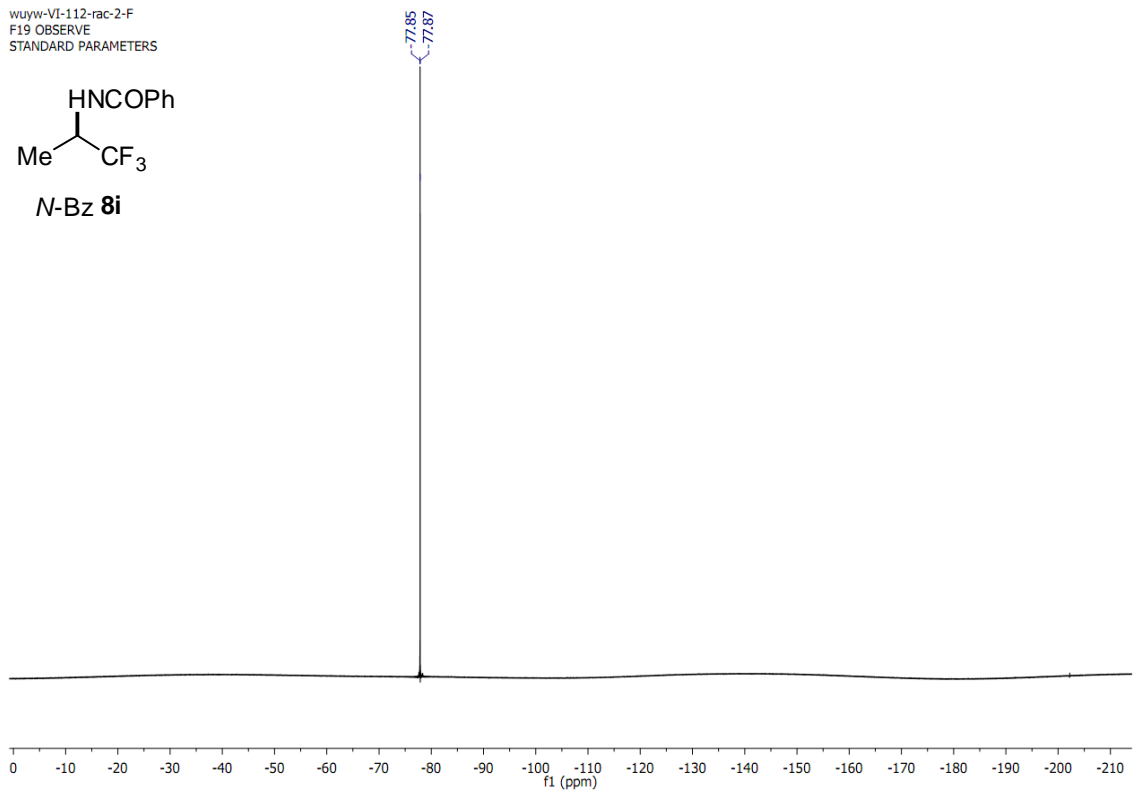

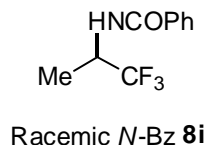

Data File C:\CHEM32\1\DATA\WUYW\WUYW-VI-112-RAC-4.D  
 Sample Name: WUYW-VI-112-rac

```

=====
Acq. Operator   : wuyw
Acq. Instrument : Instrument 1          Location : Vial 21
Injection Date  : 6/20/2012 10:22:20 AM Inj Volume : 5 µl
Acq. Method    : C:\CHEM32\1\METHODS\METHOD1.M
Last changed   : 6/20/2012 10:22:08 AM by wuyw
                (modified after loading)
Analysis Method: C:\CHEM32\1\METHODS\METHOD1.M
Last changed   : 6/20/2012 11:48:54 AM by wuyw
                (modified after loading)
Sample Info    : O2-H, Hex/IPA=95/5, 1.0 mL/min, 220nm, left, 47 bar, 25
                C
    
```

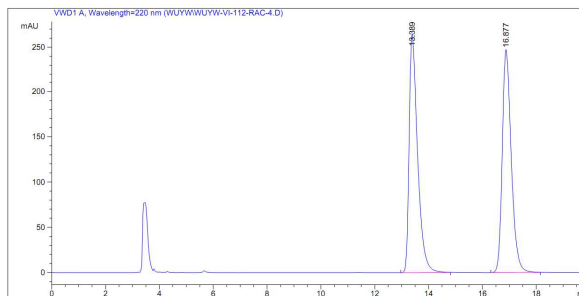

=====  
 Area Percent Report  
 =====

```

Sorted By      : Signal
Multiplier     : 1.0000
Dilution       : 1.0000
Sample Amount  : 1.00000 [ng/ul] (not used in calc.)
Use Multiplier & Dilution Factor with ISTDs

Signal 1: VWD1 A, Wavelength=220 nm

Peak RetTime Type Width Area Height Area
# [min] [min] [min] mAU *s [mAU] %
-----|-----|-----|-----|-----|-----|
1 13.389 BB 0.3238 5733.17334 264.94153 50.0171
2 16.877 BB 0.3519 5729.24414 247.25912 49.9829
Totals : 1.14624e4 512.20065
    
```

\*\*\* End of Report \*\*\*

Instrument 1 6/20/2012 2:21:43 PM wuyw Page 1 of 1  
 Data File C:\Chem32\1\DATA\WUYW\WUYW-VI-112-2.D  
 Sample Name: WUYW-VI-112

```

=====
Acq. Operator   : wuyw
Acq. Instrument : Instrument 1          Location : Vial 21
Injection Date  : 6/20/2012 11:52:00 AM Inj Volume : 10 µl
Method         : C:\CHEM32\1\METHODS\METHOD1.M
Last changed   : 6/20/2012 11:48:54 AM by wuyw
                (modified after loading)
Sample Info    : O2-H, Hex/IPA=95/5, 1.8 mL/min, 220nm, left, 47 bar, 25
                C
    
```

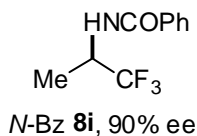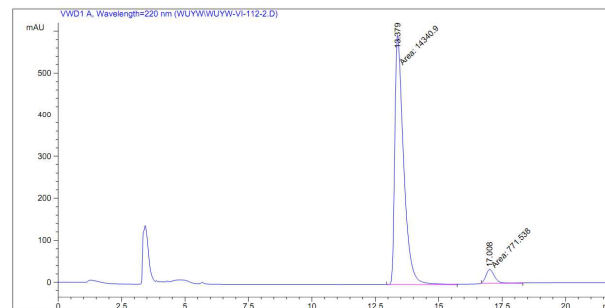

=====  
 Area Percent Report  
 =====

```

Sorted By      : Signal
Multiplier     : 1.0000
Dilution       : 1.0000
Sample Amount  : 1.00000 [ng/ul] (not used in calc.)
Use Multiplier & Dilution Factor with ISTDs

Signal 1: VWD1 A, Wavelength=220 nm

Peak RetTime Type Width Area Height Area
# [min] [min] [min] mAU *s [mAU] %
-----|-----|-----|-----|-----|-----|
1 13.379 MM 0.4016 1.43409e4 595.17163 94.8947
2 17.008 MM 0.3939 771.53839 32.64733 5.1053
Totals : 1.51124e4 627.81896
    
```

\*\*\* End of Report \*\*\*

Instrument 1 6/20/2012 2:21:05 PM wuyw Page 1 of 1
